# Supplementary material for: Spin Berry curvature-enhanced orbital Zeeman effect in a kagome metal
Source: Springer Nature journal article supplement (doi:10.1038/s41567-024-02487-z), 2024-04-22
Supplement: MOESM2 [file 41567_2024_2487_MOESM2_ESM%20%281%29.xlsx]

## Sheet: band cut and Berry curvature
Band index	k value along Γ-K-M-Γ	Energy	Berry Curvature
	Inverse angstrom	eV	angstrom^2
1	0	-10.6112	-0.0749
1	0.00765672	-10.611	-0.07485
1	0.0153134	-10.6103	-0.07471
1	0.0229702	-10.6092	-0.07447
1	0.0306269	-10.6077	-0.07413
1	0.0382836	-10.6058	-0.07371
1	0.0459403	-10.6034	-0.07319
1	0.053597	-10.6005	-0.07258
1	0.0612537	-10.5972	-0.07189
1	0.0689104	-10.5935	-0.07112
1	0.0765672	-10.5893	-0.07026
1	0.0842239	-10.5847	-0.06934
1	0.0918806	-10.5796	-0.06834
1	0.0995373	-10.5741	-0.06728
1	0.107194	-10.5681	-0.06617
1	0.114851	-10.5617	-0.065
1	0.122507	-10.5548	-0.06378
1	0.130164	-10.5474	-0.06253
1	0.137821	-10.5396	-0.06125
1	0.145478	-10.5312	-0.05994
1	0.153134	-10.5225	-0.05861
1	0.160791	-10.5132	-0.05727
1	0.168448	-10.5035	-0.05593
1	0.176104	-10.4933	-0.05459
1	0.183761	-10.4826	-0.05325
1	0.191418	-10.4714	-0.05193
1	0.199075	-10.4598	-0.05062
1	0.206731	-10.4476	-0.04933
1	0.214388	-10.435	-0.04806
1	0.222045	-10.4219	-0.04681
1	0.229701	-10.4082	-0.04559
1	0.237358	-10.3941	-0.04439
1	0.245015	-10.3795	-0.04321
1	0.252672	-10.3644	-0.04205
1	0.260328	-10.3488	-0.0409
1	0.267985	-10.3327	-0.03976
1	0.275642	-10.3161	-0.03863
1	0.283298	-10.299	-0.03751
1	0.290955	-10.2814	-0.03637
1	0.298612	-10.2632	-0.03523
1	0.306269	-10.2446	-0.03406
1	0.313925	-10.2255	-0.03288
1	0.321582	-10.2059	-0.03165
1	0.329239	-10.1857	-0.03039
1	0.336896	-10.1651	-0.02908
1	0.344552	-10.144	-0.02771
1	0.352209	-10.1224	-0.02627
1	0.359866	-10.1004	-0.02475
1	0.367522	-10.0779	-0.02315
1	0.375179	-10.0549	-0.02145
1	0.382836	-10.0314	-0.01965
1	0.390493	-10.0075	-0.01774
1	0.398149	-9.98321	-0.01571
1	0.405806	-9.95846	-0.01355
1	0.413463	-9.93329	-0.01126
1	0.421119	-9.90772	-0.008825
1	0.428776	-9.88174	-0.006249
1	0.436433	-9.85538	-0.003526
1	0.44409	-9.82864	-0.0006533
1	0.451746	-9.80153	0.00237
1	0.459403	-9.77405	0.005544
1	0.46706	-9.74621	0.008868
1	0.474716	-9.71802	0.01234
1	0.482373	-9.68949	0.01597
1	0.49003	-9.66061	0.01975
1	0.497687	-9.63139	0.02368
1	0.505343	-9.60183	0.02777
1	0.513	-9.57193	0.03203
1	0.520657	-9.5417	0.03648
1	0.528313	-9.51113	0.04112
1	0.53597	-9.48022	0.04601
1	0.543627	-9.44897	0.05116
1	0.551284	-9.41739	0.05664
1	0.55894	-9.38546	0.0625
1	0.566597	-9.35318	0.06885
1	0.574254	-9.32056	0.07578
1	0.58191	-9.2876	0.08345
1	0.589567	-9.25428	0.09204
1	0.597224	-9.22062	0.1018
1	0.604881	-9.18661	0.113
1	0.612537	-9.15226	0.1262
1	0.620194	-9.11756	0.1418
1	0.627851	-9.08251	0.1606
1	0.635507	-9.04713	0.1836
1	0.643164	-9.01141	0.2122
1	0.650821	-8.97536	0.2484
1	0.658478	-8.93899	0.2953
1	0.666134	-8.90231	0.3571
1	0.673791	-8.86532	0.4408
1	0.681448	-8.82804	0.5574
1	0.689104	-8.79049	0.7258
1	0.696761	-8.75268	0.98
1	0.704418	-8.71463	1.387
1	0.712075	-8.67637	2.089
1	0.719731	-8.63794	3.44
1	0.727388	-8.59939	6.486
1	0.735045	-8.56084	15.38
1	0.742701	-8.52252	57.22
1	0.750358	-8.48535	665.2
1	0.758015	-8.45919	103500
1	0.758015	-8.45919	103500
1	0.761843	-8.46573	16950
1	0.765672	-8.47568	4467
1	0.7695	-8.48596	2035
1	0.773328	-8.49627	1197
1	0.777157	-8.50653	806.3
1	0.780985	-8.51672	588.2
1	0.784813	-8.52682	451.7
1	0.788642	-8.53683	359.3
1	0.79247	-8.54674	293.1
1	0.796298	-8.55655	243.8
1	0.800127	-8.56626	205.9
1	0.803955	-8.57587	176
1	0.807784	-8.58537	152.1
1	0.811612	-8.59477	132.5
1	0.81544	-8.60406	116.4
1	0.819269	-8.61325	103
1	0.823097	-8.62233	91.72
1	0.826925	-8.6313	82.16
1	0.830754	-8.64017	74.03
1	0.834582	-8.64892	67.06
1	0.83841	-8.65757	61.08
1	0.842239	-8.6661	55.92
1	0.846067	-8.67452	51.46
1	0.849895	-8.68284	47.6
1	0.853724	-8.69104	44.26
1	0.857552	-8.69913	41.36
1	0.861381	-8.7071	38.84
1	0.865209	-8.71497	36.66
1	0.869037	-8.72272	34.77
1	0.872866	-8.73036	33.13
1	0.876694	-8.73788	31.72
1	0.880522	-8.74529	30.51
1	0.884351	-8.75259	29.46
1	0.888179	-8.75977	28.57
1	0.892007	-8.76684	27.81
1	0.895836	-8.77379	27.16
1	0.899664	-8.78063	26.62
1	0.903492	-8.78735	26.16
1	0.907321	-8.79396	25.77
1	0.911149	-8.80046	25.45
1	0.914978	-8.80684	25.18
1	0.918806	-8.81311	24.95
1	0.922634	-8.81926	24.76
1	0.926463	-8.8253	24.59
1	0.930291	-8.83123	24.45
1	0.934119	-8.83704	24.32
1	0.937948	-8.84274	24.2
1	0.941776	-8.84833	24.08
1	0.945604	-8.85381	23.96
1	0.949433	-8.85918	23.83
1	0.953261	-8.86443	23.69
1	0.957089	-8.86957	23.53
1	0.960918	-8.87461	23.36
1	0.964746	-8.87953	23.16
1	0.968575	-8.88435	22.94
1	0.972403	-8.88905	22.7
1	0.976231	-8.89365	22.42
1	0.98006	-8.89814	22.12
1	0.983888	-8.90252	21.78
1	0.987716	-8.9068	21.41
1	0.991545	-8.91096	21.01
1	0.995373	-8.91502	20.58
1	0.999201	-8.91898	20.11
1	1.00303	-8.92282	19.62
1	1.00686	-8.92656	19.09
1	1.01069	-8.9302	18.52
1	1.01451	-8.93373	17.93
1	1.01834	-8.93715	17.31
1	1.02217	-8.94047	16.67
1	1.026	-8.94368	16
1	1.02983	-8.94679	15.31
1	1.03366	-8.94978	14.6
1	1.03749	-8.95268	13.88
1	1.04131	-8.95547	13.14
1	1.04514	-8.95815	12.39
1	1.04897	-8.96072	11.64
1	1.0528	-8.96319	10.88
1	1.05663	-8.96555	10.12
1	1.06046	-8.9678	9.365
1	1.06428	-8.96995	8.618
1	1.06811	-8.97199	7.881
1	1.07194	-8.97392	7.159
1	1.07577	-8.97574	6.456
1	1.0796	-8.97746	5.774
1	1.08343	-8.97906	5.117
1	1.08725	-8.98056	4.489
1	1.09108	-8.98194	3.893
1	1.09491	-8.98322	3.332
1	1.09874	-8.98439	2.81
1	1.10257	-8.98544	2.328
1	1.1064	-8.98639	1.889
1	1.11022	-8.98722	1.497
1	1.11405	-8.98795	1.152
1	1.11788	-8.98856	0.8569
1	1.12171	-8.98906	0.6133
1	1.12554	-8.98945	0.4225
1	1.12937	-8.98973	0.2854
1	1.13319	-8.9899	0.2029
1	1.13702	-8.98996	0.1753
1	1.13702	-8.98996	0.1753
1	1.14365	-9.00002	0.1283
1	1.15028	-9.02258	0.08587
1	1.15692	-9.04965	0.06616
1	1.16355	-9.07835	0.05531
1	1.17018	-9.10769	0.0482
1	1.17681	-9.13725	0.04301
1	1.18344	-9.16684	0.03896
1	1.19007	-9.19635	0.03564
1	1.1967	-9.22571	0.03283
1	1.20333	-9.25488	0.03038
1	1.20996	-9.28383	0.02819
1	1.21659	-9.31254	0.02619
1	1.22322	-9.34099	0.02432
1	1.22986	-9.36917	0.02256
1	1.23649	-9.39708	0.02087
1	1.24312	-9.42471	0.01923
1	1.24975	-9.45206	0.01762
1	1.25638	-9.47912	0.01604
1	1.26301	-9.50589	0.01447
1	1.26964	-9.53238	0.01291
1	1.27627	-9.55859	0.01135
1	1.2829	-9.58452	0.009793
1	1.28953	-9.61016	0.008234
1	1.29616	-9.63554	0.006673
1	1.3028	-9.66063	0.005111
1	1.30943	-9.68546	0.003548
1	1.31606	-9.71002	0.001985
1	1.32269	-9.73432	0.0004235
1	1.32932	-9.75835	-0.001135
1	1.33595	-9.78212	-0.002689
1	1.34258	-9.80563	-0.004238
1	1.34921	-9.82887	-0.005781
1	1.35584	-9.85185	-0.007316
1	1.36247	-9.87457	-0.008844
1	1.3691	-9.89702	-0.01036
1	1.37574	-9.91919	-0.01187
1	1.38237	-9.94109	-0.01337
1	1.389	-9.9627	-0.01486
1	1.39563	-9.98403	-0.01633
1	1.40226	-10.0051	-0.01779
1	1.40889	-10.0258	-0.01924
1	1.41552	-10.0462	-0.02068
1	1.42215	-10.0663	-0.0221
1	1.42878	-10.0861	-0.0235
1	1.43541	-10.1056	-0.02489
1	1.44204	-10.1247	-0.02625
1	1.44868	-10.1434	-0.0276
1	1.45531	-10.1618	-0.02893
1	1.46194	-10.1799	-0.03024
1	1.46857	-10.1976	-0.03153
1	1.4752	-10.2149	-0.03279
1	1.48183	-10.2318	-0.03404
1	1.48846	-10.2484	-0.03526
1	1.49509	-10.2646	-0.03646
1	1.50172	-10.2803	-0.03765
1	1.50835	-10.2957	-0.03881
1	1.51498	-10.3107	-0.03995
1	1.52162	-10.3253	-0.04108
1	1.52825	-10.3396	-0.04219
1	1.53488	-10.3534	-0.04328
1	1.54151	-10.3668	-0.04437
1	1.54814	-10.3799	-0.04544
1	1.55477	-10.3926	-0.0465
1	1.5614	-10.4048	-0.04755
1	1.56803	-10.4168	-0.0486
1	1.57466	-10.4283	-0.04964
1	1.58129	-10.4394	-0.05067
1	1.58792	-10.4502	-0.05171
1	1.59456	-10.4606	-0.05274
1	1.60119	-10.4707	-0.05377
1	1.60782	-10.4804	-0.0548
1	1.61445	-10.4897	-0.05583
1	1.62108	-10.4987	-0.05685
1	1.62771	-10.5073	-0.05788
1	1.63434	-10.5155	-0.0589
1	1.64097	-10.5234	-0.05991
1	1.6476	-10.531	-0.06092
1	1.65423	-10.5382	-0.06192
1	1.66086	-10.5451	-0.06291
1	1.6675	-10.5516	-0.06389
1	1.67413	-10.5577	-0.06485
1	1.68076	-10.5636	-0.06578
1	1.68739	-10.569	-0.0667
1	1.69402	-10.5742	-0.06758
1	1.70065	-10.579	-0.06843
1	1.70728	-10.5835	-0.06925
1	1.71391	-10.5876	-0.07003
1	1.72054	-10.5914	-0.07076
1	1.72717	-10.5948	-0.07144
1	1.7338	-10.5979	-0.07207
1	1.74044	-10.6007	-0.07264
1	1.74707	-10.6032	-0.07316
1	1.7537	-10.6053	-0.07361
1	1.76033	-10.6071	-0.074
1	1.76696	-10.6086	-0.07432
1	1.77359	-10.6097	-0.07457
1	1.78022	-10.6105	-0.07475
1	1.78685	-10.611	-0.07486
1	1.79348	-10.6112	-0.0749
2	0	-10.611	0.0749
2	0.00765672	-10.6108	0.07485
2	0.0153134	-10.6101	0.07471
2	0.0229702	-10.609	0.07447
2	0.0306269	-10.6075	0.07413
2	0.0382836	-10.6056	0.07371
2	0.0459403	-10.6032	0.07319
2	0.053597	-10.6003	0.07258
2	0.0612537	-10.597	0.07189
2	0.0689104	-10.5933	0.07112
2	0.0765672	-10.5891	0.07026
2	0.0842239	-10.5845	0.06934
2	0.0918806	-10.5794	0.06834
2	0.0995373	-10.5739	0.06728
2	0.107194	-10.5679	0.06617
2	0.114851	-10.5615	0.065
2	0.122507	-10.5546	0.06378
2	0.130164	-10.5472	0.06253
2	0.137821	-10.5394	0.06125
2	0.145478	-10.531	0.05994
2	0.153134	-10.5223	0.05861
2	0.160791	-10.513	0.05727
2	0.168448	-10.5033	0.05593
2	0.176104	-10.4931	0.05459
2	0.183761	-10.4824	0.05325
2	0.191418	-10.4712	0.05193
2	0.199075	-10.4596	0.05062
2	0.206731	-10.4474	0.04933
2	0.214388	-10.4348	0.04806
2	0.222045	-10.4217	0.04681
2	0.229701	-10.408	0.04559
2	0.237358	-10.3939	0.04439
2	0.245015	-10.3793	0.04321
2	0.252672	-10.3642	0.04205
2	0.260328	-10.3486	0.0409
2	0.267985	-10.3325	0.03976
2	0.275642	-10.3159	0.03863
2	0.283298	-10.2988	0.03751
2	0.290955	-10.2812	0.03637
2	0.298612	-10.263	0.03523
2	0.306269	-10.2444	0.03406
2	0.313925	-10.2253	0.03288
2	0.321582	-10.2057	0.03165
2	0.329239	-10.1855	0.03039
2	0.336896	-10.1649	0.02908
2	0.344552	-10.1438	0.02771
2	0.352209	-10.1222	0.02627
2	0.359866	-10.1002	0.02475
2	0.367522	-10.0777	0.02315
2	0.375179	-10.0547	0.02145
2	0.382836	-10.0312	0.01965
2	0.390493	-10.0073	0.01774
2	0.398149	-9.98301	0.01571
2	0.405806	-9.95826	0.01355
2	0.413463	-9.93309	0.01126
2	0.421119	-9.90752	0.008825
2	0.428776	-9.88154	0.006249
2	0.436433	-9.85518	0.003526
2	0.44409	-9.82844	0.0006532
2	0.451746	-9.80133	-0.00237
2	0.459403	-9.77385	-0.005544
2	0.46706	-9.74601	-0.008868
2	0.474716	-9.71782	-0.01234
2	0.482373	-9.68929	-0.01597
2	0.49003	-9.66041	-0.01975
2	0.497687	-9.63119	-0.02368
2	0.505343	-9.60163	-0.02777
2	0.513	-9.57173	-0.03203
2	0.520657	-9.5415	-0.03648
2	0.528313	-9.51093	-0.04112
2	0.53597	-9.48002	-0.04601
2	0.543627	-9.44877	-0.05116
2	0.551284	-9.41719	-0.05664
2	0.55894	-9.38526	-0.0625
2	0.566597	-9.35298	-0.06885
2	0.574254	-9.32036	-0.07578
2	0.58191	-9.2874	-0.08345
2	0.589567	-9.25408	-0.09204
2	0.597224	-9.22042	-0.1018
2	0.604881	-9.18641	-0.113
2	0.612537	-9.15206	-0.1262
2	0.620194	-9.11736	-0.1418
2	0.627851	-9.08231	-0.1606
2	0.635507	-9.04693	-0.1836
2	0.643164	-9.01121	-0.2122
2	0.650821	-8.97516	-0.2484
2	0.658478	-8.93879	-0.2953
2	0.666134	-8.90211	-0.3571
2	0.673791	-8.86512	-0.4408
2	0.681448	-8.82784	-0.5574
2	0.689104	-8.79029	-0.7258
2	0.696761	-8.75248	-0.98
2	0.704418	-8.71443	-1.387
2	0.712075	-8.67617	-2.089
2	0.719731	-8.63774	-3.44
2	0.727388	-8.59919	-6.486
2	0.735045	-8.56064	-15.38
2	0.742701	-8.52232	-57.22
2	0.750358	-8.48515	-665.2
2	0.758015	-8.45899	-103500
2	0.758015	-8.45899	-103500
2	0.761843	-8.46553	-16950
2	0.765672	-8.47548	-4467
2	0.7695	-8.48576	-2035
2	0.773328	-8.49607	-1197
2	0.777157	-8.50633	-806.3
2	0.780985	-8.51652	-588.2
2	0.784813	-8.52662	-451.7
2	0.788642	-8.53663	-359.3
2	0.79247	-8.54654	-293.1
2	0.796298	-8.55635	-243.8
2	0.800127	-8.56606	-205.9
2	0.803955	-8.57567	-176
2	0.807784	-8.58517	-152.1
2	0.811612	-8.59457	-132.5
2	0.81544	-8.60386	-116.4
2	0.819269	-8.61305	-103
2	0.823097	-8.62213	-91.72
2	0.826925	-8.6311	-82.16
2	0.830754	-8.63997	-74.03
2	0.834582	-8.64872	-67.06
2	0.83841	-8.65737	-61.08
2	0.842239	-8.6659	-55.92
2	0.846067	-8.67432	-51.46
2	0.849895	-8.68264	-47.6
2	0.853724	-8.69084	-44.26
2	0.857552	-8.69893	-41.36
2	0.861381	-8.7069	-38.84
2	0.865209	-8.71477	-36.66
2	0.869037	-8.72252	-34.77
2	0.872866	-8.73016	-33.13
2	0.876694	-8.73768	-31.72
2	0.880522	-8.74509	-30.51
2	0.884351	-8.75239	-29.46
2	0.888179	-8.75957	-28.57
2	0.892007	-8.76664	-27.81
2	0.895836	-8.77359	-27.16
2	0.899664	-8.78043	-26.62
2	0.903492	-8.78715	-26.16
2	0.907321	-8.79376	-25.77
2	0.911149	-8.80026	-25.45
2	0.914978	-8.80664	-25.18
2	0.918806	-8.81291	-24.95
2	0.922634	-8.81906	-24.76
2	0.926463	-8.8251	-24.59
2	0.930291	-8.83103	-24.45
2	0.934119	-8.83684	-24.32
2	0.937948	-8.84254	-24.2
2	0.941776	-8.84813	-24.08
2	0.945604	-8.85361	-23.96
2	0.949433	-8.85898	-23.83
2	0.953261	-8.86423	-23.69
2	0.957089	-8.86937	-23.53
2	0.960918	-8.87441	-23.36
2	0.964746	-8.87933	-23.16
2	0.968575	-8.88415	-22.94
2	0.972403	-8.88885	-22.7
2	0.976231	-8.89345	-22.42
2	0.98006	-8.89794	-22.12
2	0.983888	-8.90232	-21.78
2	0.987716	-8.9066	-21.41
2	0.991545	-8.91076	-21.01
2	0.995373	-8.91482	-20.58
2	0.999201	-8.91878	-20.11
2	1.00303	-8.92262	-19.62
2	1.00686	-8.92636	-19.09
2	1.01069	-8.93	-18.52
2	1.01451	-8.93353	-17.93
2	1.01834	-8.93695	-17.31
2	1.02217	-8.94027	-16.67
2	1.026	-8.94348	-16
2	1.02983	-8.94659	-15.31
2	1.03366	-8.94958	-14.6
2	1.03749	-8.95248	-13.88
2	1.04131	-8.95527	-13.14
2	1.04514	-8.95795	-12.39
2	1.04897	-8.96052	-11.64
2	1.0528	-8.96299	-10.88
2	1.05663	-8.96535	-10.12
2	1.06046	-8.9676	-9.365
2	1.06428	-8.96975	-8.618
2	1.06811	-8.97179	-7.881
2	1.07194	-8.97372	-7.159
2	1.07577	-8.97554	-6.456
2	1.0796	-8.97726	-5.774
2	1.08343	-8.97886	-5.117
2	1.08725	-8.98036	-4.489
2	1.09108	-8.98174	-3.893
2	1.09491	-8.98302	-3.332
2	1.09874	-8.98419	-2.81
2	1.10257	-8.98524	-2.328
2	1.1064	-8.98619	-1.889
2	1.11022	-8.98702	-1.497
2	1.11405	-8.98775	-1.152
2	1.11788	-8.98836	-0.8569
2	1.12171	-8.98886	-0.6133
2	1.12554	-8.98925	-0.4225
2	1.12937	-8.98953	-0.2854
2	1.13319	-8.9897	-0.2029
2	1.13702	-8.98976	-0.1753
2	1.13702	-8.98976	-0.1753
2	1.14365	-8.99982	-0.1284
2	1.15028	-9.02238	-0.08587
2	1.15692	-9.04945	-0.06617
2	1.16355	-9.07815	-0.05532
2	1.17018	-9.10749	-0.04821
2	1.17681	-9.13705	-0.04302
2	1.18344	-9.16664	-0.03896
2	1.19007	-9.19615	-0.03565
2	1.1967	-9.22551	-0.03283
2	1.20333	-9.25468	-0.03038
2	1.20996	-9.28363	-0.02819
2	1.21659	-9.31234	-0.02619
2	1.22322	-9.34079	-0.02432
2	1.22986	-9.36897	-0.02256
2	1.23649	-9.39688	-0.02087
2	1.24312	-9.42451	-0.01923
2	1.24975	-9.45186	-0.01762
2	1.25638	-9.47892	-0.01604
2	1.26301	-9.50569	-0.01447
2	1.26964	-9.53218	-0.01291
2	1.27627	-9.55839	-0.01135
2	1.2829	-9.58432	-0.009794
2	1.28953	-9.60996	-0.008234
2	1.29616	-9.63534	-0.006673
2	1.3028	-9.66043	-0.005111
2	1.30943	-9.68526	-0.003548
2	1.31606	-9.70982	-0.001985
2	1.32269	-9.73412	-0.0004235
2	1.32932	-9.75815	0.001135
2	1.33595	-9.78192	0.002689
2	1.34258	-9.80543	0.004238
2	1.34921	-9.82867	0.005781
2	1.35584	-9.85165	0.007316
2	1.36247	-9.87437	0.008844
2	1.3691	-9.89682	0.01036
2	1.37574	-9.91899	0.01187
2	1.38237	-9.94089	0.01337
2	1.389	-9.9625	0.01486
2	1.39563	-9.98383	0.01633
2	1.40226	-10.0049	0.01779
2	1.40889	-10.0256	0.01924
2	1.41552	-10.046	0.02068
2	1.42215	-10.0661	0.0221
2	1.42878	-10.0859	0.0235
2	1.43541	-10.1054	0.02489
2	1.44204	-10.1245	0.02625
2	1.44868	-10.1432	0.0276
2	1.45531	-10.1616	0.02893
2	1.46194	-10.1797	0.03024
2	1.46857	-10.1974	0.03153
2	1.4752	-10.2147	0.03279
2	1.48183	-10.2316	0.03404
2	1.48846	-10.2482	0.03526
2	1.49509	-10.2644	0.03646
2	1.50172	-10.2801	0.03765
2	1.50835	-10.2955	0.03881
2	1.51498	-10.3105	0.03995
2	1.52162	-10.3251	0.04108
2	1.52825	-10.3394	0.04219
2	1.53488	-10.3532	0.04328
2	1.54151	-10.3666	0.04437
2	1.54814	-10.3797	0.04544
2	1.55477	-10.3924	0.0465
2	1.5614	-10.4046	0.04755
2	1.56803	-10.4166	0.0486
2	1.57466	-10.4281	0.04964
2	1.58129	-10.4392	0.05067
2	1.58792	-10.45	0.05171
2	1.59456	-10.4604	0.05274
2	1.60119	-10.4705	0.05377
2	1.60782	-10.4802	0.0548
2	1.61445	-10.4895	0.05583
2	1.62108	-10.4985	0.05685
2	1.62771	-10.5071	0.05788
2	1.63434	-10.5153	0.0589
2	1.64097	-10.5232	0.05991
2	1.6476	-10.5308	0.06092
2	1.65423	-10.538	0.06192
2	1.66086	-10.5449	0.06291
2	1.6675	-10.5514	0.06389
2	1.67413	-10.5575	0.06485
2	1.68076	-10.5634	0.06578
2	1.68739	-10.5688	0.0667
2	1.69402	-10.574	0.06758
2	1.70065	-10.5788	0.06843
2	1.70728	-10.5833	0.06925
2	1.71391	-10.5874	0.07003
2	1.72054	-10.5912	0.07076
2	1.72717	-10.5946	0.07144
2	1.7338	-10.5977	0.07207
2	1.74044	-10.6005	0.07264
2	1.74707	-10.603	0.07316
2	1.7537	-10.6051	0.07361
2	1.76033	-10.6069	0.074
2	1.76696	-10.6084	0.07432
2	1.77359	-10.6095	0.07457
2	1.78022	-10.6103	0.07475
2	1.78685	-10.6108	0.07486
2	1.79348	-10.611	0.0749
3	0	-9.40736	-0.06117
3	0.00765672	-9.40716	-0.06109
3	0.0153134	-9.40655	-0.06085
3	0.0229702	-9.40554	-0.06045
3	0.0306269	-9.40412	-0.05991
3	0.0382836	-9.4023	-0.05923
3	0.0459403	-9.40006	-0.05843
3	0.053597	-9.39741	-0.05752
3	0.0612537	-9.39433	-0.05651
3	0.0689104	-9.39084	-0.05543
3	0.0765672	-9.38693	-0.05429
3	0.0842239	-9.38258	-0.05311
3	0.0918806	-9.37781	-0.05189
3	0.0995373	-9.3726	-0.05065
3	0.107194	-9.36696	-0.04941
3	0.114851	-9.36088	-0.04815
3	0.122507	-9.35436	-0.04689
3	0.130164	-9.34741	-0.04563
3	0.137821	-9.34003	-0.04435
3	0.145478	-9.33221	-0.04306
3	0.153134	-9.32396	-0.04174
3	0.160791	-9.31529	-0.04037
3	0.168448	-9.3062	-0.03894
3	0.176104	-9.29669	-0.03743
3	0.183761	-9.28677	-0.03581
3	0.191418	-9.27644	-0.03407
3	0.199075	-9.26572	-0.03219
3	0.206731	-9.2546	-0.03014
3	0.214388	-9.2431	-0.0279
3	0.222045	-9.23122	-0.02546
3	0.229701	-9.21896	-0.0228
3	0.237358	-9.20633	-0.01989
3	0.245015	-9.19334	-0.01674
3	0.252672	-9.17998	-0.01333
3	0.260328	-9.16626	-0.009649
3	0.267985	-9.15218	-0.005706
3	0.275642	-9.13775	-0.001494
3	0.283298	-9.12296	0.002984
3	0.290955	-9.10781	0.007724
3	0.298612	-9.09231	0.01272
3	0.306269	-9.07646	0.01798
3	0.313925	-9.06026	0.02348
3	0.321582	-9.0437	0.02922
3	0.329239	-9.0268	0.03522
3	0.336896	-9.00955	0.04146
3	0.344552	-8.99195	0.04796
3	0.352209	-8.97402	0.05473
3	0.359866	-8.95576	0.0618
3	0.367522	-8.93718	0.06919
3	0.375179	-8.91829	0.07696
3	0.382836	-8.89909	0.08515
3	0.390493	-8.87961	0.09383
3	0.398149	-8.85985	0.1031
3	0.405806	-8.83984	0.1131
3	0.413463	-8.81959	0.1238
3	0.421119	-8.79912	0.1356
3	0.428776	-8.77846	0.1485
3	0.436433	-8.75761	0.1628
3	0.44409	-8.73661	0.1788
3	0.451746	-8.71548	0.1967
3	0.459403	-8.69424	0.2169
3	0.46706	-8.6729	0.24
3	0.474716	-8.6515	0.2663
3	0.482373	-8.63005	0.2967
3	0.49003	-8.60858	0.3318
3	0.497687	-8.58711	0.3727
3	0.505343	-8.56565	0.4206
3	0.513	-8.54423	0.4772
3	0.520657	-8.52287	0.5445
3	0.528313	-8.50161	0.6252
3	0.53597	-8.48045	0.723
3	0.543627	-8.45945	0.8427
3	0.551284	-8.43862	0.9911
3	0.55894	-8.41803	1.178
3	0.566597	-8.39773	1.416
3	0.574254	-8.37779	1.727
3	0.58191	-8.3583	2.139
3	0.589567	-8.33939	2.699
3	0.597224	-8.32121	3.481
3	0.604881	-8.30397	4.602
3	0.612537	-8.28794	6.26
3	0.620194	-8.27347	8.798
3	0.627851	-8.26101	12.83
3	0.635507	-8.25106	19.48
3	0.643164	-8.24417	30.91
3	0.650821	-8.24082	51.28
3	0.658478	-8.24126	88.76
3	0.666134	-8.24544	159.9
3	0.673791	-8.253	300.5
3	0.681448	-8.26341	598
3	0.689104	-8.2761	1296
3	0.696761	-8.29055	3202
3	0.704418	-8.30644	9478
3	0.712075	-8.3238	30680
3	0.719731	-8.34328	45650
3	0.727388	-8.36487	19340
3	0.735045	-8.38713	7186
3	0.742701	-8.40931	3551
3	0.750358	-8.43095	2457
3	0.758015	-8.44712	-97680
3	0.758015	-8.44712	-97680
3	0.761843	-8.44598	-14510
3	0.765672	-8.45001	-4051
3	0.7695	-8.45684	-1933
3	0.773328	-8.4646	-1159
3	0.777157	-8.47269	-787.6
3	0.780985	-8.48093	-577.3
3	0.784813	-8.48923	-444.6
3	0.788642	-8.49752	-354.2
3	0.79247	-8.5058	-289.3
3	0.796298	-8.51404	-240.8
3	0.800127	-8.52223	-203.5
3	0.803955	-8.53037	-174.1
3	0.807784	-8.53845	-150.4
3	0.811612	-8.54646	-131.1
3	0.81544	-8.5544	-115.2
3	0.819269	-8.56226	-101.9
3	0.823097	-8.57005	-90.75
3	0.826925	-8.57776	-81.29
3	0.830754	-8.5854	-73.23
3	0.834582	-8.59295	-66.34
3	0.83841	-8.60042	-60.41
3	0.842239	-8.60781	-55.3
3	0.846067	-8.61511	-50.89
3	0.849895	-8.62233	-47.07
3	0.853724	-8.62946	-43.75
3	0.857552	-8.6365	-40.88
3	0.861381	-8.64345	-38.39
3	0.865209	-8.65032	-36.23
3	0.869037	-8.6571	-34.36
3	0.872866	-8.66379	-32.74
3	0.876694	-8.6704	-31.34
3	0.880522	-8.67691	-30.14
3	0.884351	-8.68333	-29.11
3	0.888179	-8.68967	-28.22
3	0.892007	-8.69591	-27.47
3	0.895836	-8.70207	-26.83
3	0.899664	-8.70813	-26.29
3	0.903492	-8.71411	-25.84
3	0.907321	-8.71999	-25.46
3	0.911149	-8.72579	-25.14
3	0.914978	-8.7315	-24.87
3	0.918806	-8.73711	-24.65
3	0.922634	-8.74264	-24.46
3	0.926463	-8.74807	-24.3
3	0.930291	-8.75342	-24.15
3	0.934119	-8.75868	-24.03
3	0.937948	-8.76384	-23.91
3	0.941776	-8.76892	-23.79
3	0.945604	-8.7739	-23.67
3	0.949433	-8.7788	-23.54
3	0.953261	-8.78361	-23.4
3	0.957089	-8.78832	-23.25
3	0.960918	-8.79294	-23.08
3	0.964746	-8.79748	-22.89
3	0.968575	-8.80192	-22.67
3	0.972403	-8.80627	-22.43
3	0.976231	-8.81053	-22.15
3	0.98006	-8.8147	-21.85
3	0.983888	-8.81878	-21.52
3	0.987716	-8.82277	-21.15
3	0.991545	-8.82666	-20.76
3	0.995373	-8.83046	-20.33
3	0.999201	-8.83416	-19.86
3	1.00303	-8.83778	-19.37
3	1.00686	-8.8413	-18.84
3	1.01069	-8.84472	-18.28
3	1.01451	-8.84805	-17.7
3	1.01834	-8.85129	-17.08
3	1.02217	-8.85443	-16.44
3	1.026	-8.85747	-15.78
3	1.02983	-8.86042	-15.09
3	1.03366	-8.86327	-14.39
3	1.03749	-8.86602	-13.67
3	1.04131	-8.86867	-12.94
3	1.04514	-8.87123	-12.19
3	1.04897	-8.87368	-11.44
3	1.0528	-8.87604	-10.69
3	1.05663	-8.87829	-9.935
3	1.06046	-8.88045	-9.185
3	1.06428	-8.8825	-8.442
3	1.06811	-8.88445	-7.71
3	1.07194	-8.8863	-6.992
3	1.07577	-8.88805	-6.293
3	1.0796	-8.88969	-5.615
3	1.08343	-8.89123	-4.962
3	1.08725	-8.89266	-4.338
3	1.09108	-8.89399	-3.745
3	1.09491	-8.89522	-3.187
3	1.09874	-8.89634	-2.668
3	1.10257	-8.89736	-2.188
3	1.1064	-8.89826	-1.752
3	1.11022	-8.89907	-1.362
3	1.11405	-8.89976	-1.019
3	1.11788	-8.90035	-0.7258
3	1.12171	-8.90083	-0.4836
3	1.12554	-8.90121	-0.2938
3	1.12937	-8.90148	-0.1575
3	1.13319	-8.90164	-0.07546
3	1.13702	-8.90169	-0.04805
3	1.13702	-8.90169	-0.04805
3	1.14365	-8.8915	0.001279
3	1.15028	-8.86857	0.05112
3	1.15692	-8.84091	0.08406
3	1.16355	-8.81142	0.1156
3	1.17018	-8.78115	0.1536
3	1.17681	-8.75056	0.2041
3	1.18344	-8.71997	0.2747
3	1.19007	-8.68961	0.3765
3	1.1967	-8.65977	0.527
3	1.20333	-8.63079	0.7524
3	1.20996	-8.60316	1.09
3	1.21659	-8.57754	1.581
3	1.22322	-8.55489	2.236
3	1.22986	-8.53639	2.957
3	1.23649	-8.52328	3.473
3	1.24312	-8.51633	3.501
3	1.24975	-8.51544	3.055
3	1.25638	-8.51973	2.412
3	1.26301	-8.52798	1.813
3	1.26964	-8.53911	1.346
3	1.27627	-8.55227	1.007
3	1.2829	-8.56687	0.7673
3	1.28953	-8.58249	0.5961
3	1.29616	-8.59884	0.4724
3	1.3028	-8.61573	0.3811
3	1.30943	-8.63298	0.3123
3	1.31606	-8.65051	0.2595
3	1.32269	-8.66821	0.2181
3	1.32932	-8.68603	0.1852
3	1.33595	-8.70391	0.1586
3	1.34258	-8.7218	0.1367
3	1.34921	-8.73966	0.1186
3	1.35584	-8.75748	0.1033
3	1.36247	-8.77521	0.0904
3	1.3691	-8.79285	0.0793
3	1.37574	-8.81035	0.0697
3	1.38237	-8.82772	0.06131
3	1.389	-8.84493	0.05392
3	1.39563	-8.86198	0.04737
3	1.40226	-8.87884	0.0415
3	1.40889	-8.8955	0.0362
3	1.41552	-8.91197	0.03139
3	1.42215	-8.92823	0.02699
3	1.42878	-8.94427	0.02292
3	1.43541	-8.96008	0.01916
3	1.44204	-8.97567	0.01564
3	1.44868	-8.99103	0.01233
3	1.45531	-9.00615	0.009218
3	1.46194	-9.02104	0.006265
3	1.46857	-9.03568	0.003456
3	1.4752	-9.05008	0.0007751
3	1.48183	-9.06424	-0.001789
3	1.48846	-9.07815	-0.004247
3	1.49509	-9.09181	-0.006605
3	1.50172	-9.10522	-0.008871
3	1.50835	-9.11839	-0.01105
3	1.51498	-9.13129	-0.01314
3	1.52162	-9.14395	-0.01516
3	1.52825	-9.15635	-0.01709
3	1.53488	-9.16848	-0.01895
3	1.54151	-9.18036	-0.02074
3	1.54814	-9.19197	-0.02245
3	1.55477	-9.20331	-0.0241
3	1.5614	-9.21438	-0.02569
3	1.56803	-9.22518	-0.02722
3	1.57466	-9.23569	-0.02869
3	1.58129	-9.24593	-0.0301
3	1.58792	-9.25587	-0.03148
3	1.59456	-9.26552	-0.03281
3	1.60119	-9.27488	-0.0341
3	1.60782	-9.28393	-0.03536
3	1.61445	-9.29267	-0.0366
3	1.62108	-9.30111	-0.03782
3	1.62771	-9.30923	-0.03902
3	1.63434	-9.31704	-0.04021
3	1.64097	-9.32452	-0.04139
3	1.6476	-9.33168	-0.04256
3	1.65423	-9.33852	-0.04374
3	1.66086	-9.34503	-0.04491
3	1.6675	-9.35121	-0.04608
3	1.67413	-9.35706	-0.04724
3	1.68076	-9.36258	-0.0484
3	1.68739	-9.36777	-0.04955
3	1.69402	-9.37264	-0.05069
3	1.70065	-9.37717	-0.0518
3	1.70728	-9.38138	-0.0529
3	1.71391	-9.38527	-0.05396
3	1.72054	-9.38883	-0.05498
3	1.72717	-9.39208	-0.05595
3	1.7338	-9.395	-0.05686
3	1.74044	-9.39761	-0.05771
3	1.74707	-9.39991	-0.05848
3	1.7537	-9.40189	-0.05917
3	1.76033	-9.40357	-0.05976
3	1.76696	-9.40493	-0.06026
3	1.77359	-9.406	-0.06066
3	1.78022	-9.40675	-0.06094
3	1.78685	-9.40721	-0.06111
3	1.79348	-9.40736	-0.06117
4	0	-9.40716	0.06117
4	0.00765672	-9.40696	0.06109
4	0.0153134	-9.40635	0.06085
4	0.0229702	-9.40534	0.06045
4	0.0306269	-9.40392	0.05991
4	0.0382836	-9.4021	0.05923
4	0.0459403	-9.39986	0.05843
4	0.053597	-9.39721	0.05752
4	0.0612537	-9.39413	0.05651
4	0.0689104	-9.39064	0.05543
4	0.0765672	-9.38673	0.05429
4	0.0842239	-9.38238	0.05311
4	0.0918806	-9.37761	0.05189
4	0.0995373	-9.3724	0.05065
4	0.107194	-9.36676	0.0494
4	0.114851	-9.36068	0.04815
4	0.122507	-9.35416	0.04689
4	0.130164	-9.34721	0.04563
4	0.137821	-9.33983	0.04435
4	0.145478	-9.33201	0.04306
4	0.153134	-9.32376	0.04174
4	0.160791	-9.31509	0.04037
4	0.168448	-9.306	0.03894
4	0.176104	-9.29649	0.03743
4	0.183761	-9.28657	0.03581
4	0.191418	-9.27624	0.03407
4	0.199075	-9.26552	0.03219
4	0.206731	-9.2544	0.03014
4	0.214388	-9.2429	0.0279
4	0.222045	-9.23102	0.02546
4	0.229701	-9.21876	0.02279
4	0.237358	-9.20613	0.01989
4	0.245015	-9.19314	0.01674
4	0.252672	-9.17978	0.01332
4	0.260328	-9.16606	0.009648
4	0.267985	-9.15198	0.005705
4	0.275642	-9.13755	0.001493
4	0.283298	-9.12276	-0.002985
4	0.290955	-9.10761	-0.007725
4	0.298612	-9.09211	-0.01272
4	0.306269	-9.07626	-0.01798
4	0.313925	-9.06006	-0.02348
4	0.321582	-9.0435	-0.02923
4	0.329239	-9.0266	-0.03522
4	0.336896	-9.00935	-0.04146
4	0.344552	-8.99175	-0.04796
4	0.352209	-8.97382	-0.05473
4	0.359866	-8.95556	-0.0618
4	0.367522	-8.93698	-0.06919
4	0.375179	-8.91809	-0.07696
4	0.382836	-8.89889	-0.08515
4	0.390493	-8.87941	-0.09383
4	0.398149	-8.85965	-0.1031
4	0.405806	-8.83964	-0.1131
4	0.413463	-8.81939	-0.1238
4	0.421119	-8.79892	-0.1356
4	0.428776	-8.77826	-0.1485
4	0.436433	-8.75741	-0.1628
4	0.44409	-8.73641	-0.1788
4	0.451746	-8.71528	-0.1967
4	0.459403	-8.69404	-0.2169
4	0.46706	-8.6727	-0.24
4	0.474716	-8.6513	-0.2663
4	0.482373	-8.62985	-0.2967
4	0.49003	-8.60838	-0.3318
4	0.497687	-8.58691	-0.3727
4	0.505343	-8.56545	-0.4206
4	0.513	-8.54403	-0.4772
4	0.520657	-8.52267	-0.5445
4	0.528313	-8.50141	-0.6252
4	0.53597	-8.48025	-0.723
4	0.543627	-8.45925	-0.8427
4	0.551284	-8.43842	-0.9911
4	0.55894	-8.41783	-1.178
4	0.566597	-8.39753	-1.416
4	0.574254	-8.37759	-1.727
4	0.58191	-8.3581	-2.139
4	0.589567	-8.33919	-2.699
4	0.597224	-8.32101	-3.481
4	0.604881	-8.30377	-4.602
4	0.612537	-8.28774	-6.26
4	0.620194	-8.27327	-8.798
4	0.627851	-8.26081	-12.83
4	0.635507	-8.25086	-19.48
4	0.643164	-8.24397	-30.91
4	0.650821	-8.24062	-51.28
4	0.658478	-8.24106	-88.76
4	0.666134	-8.24524	-159.9
4	0.673791	-8.2528	-300.5
4	0.681448	-8.26321	-598
4	0.689104	-8.2759	-1296
4	0.696761	-8.29035	-3202
4	0.704418	-8.30624	-9478
4	0.712075	-8.3236	-30680
4	0.719731	-8.34308	-45650
4	0.727388	-8.36467	-19340
4	0.735045	-8.38693	-7186
4	0.742701	-8.40911	-3551
4	0.750358	-8.43075	-2457
4	0.758015	-8.44692	97680
4	0.758015	-8.44692	97680
4	0.761843	-8.44578	14510
4	0.765672	-8.44981	4051
4	0.7695	-8.45664	1933
4	0.773328	-8.4644	1159
4	0.777157	-8.47249	787.6
4	0.780985	-8.48073	577.3
4	0.784813	-8.48903	444.6
4	0.788642	-8.49732	354.2
4	0.79247	-8.5056	289.3
4	0.796298	-8.51384	240.8
4	0.800127	-8.52203	203.5
4	0.803955	-8.53017	174.1
4	0.807784	-8.53825	150.4
4	0.811612	-8.54626	131.1
4	0.81544	-8.5542	115.2
4	0.819269	-8.56206	101.9
4	0.823097	-8.56985	90.75
4	0.826925	-8.57756	81.29
4	0.830754	-8.5852	73.23
4	0.834582	-8.59275	66.34
4	0.83841	-8.60022	60.41
4	0.842239	-8.60761	55.3
4	0.846067	-8.61491	50.89
4	0.849895	-8.62213	47.07
4	0.853724	-8.62926	43.75
4	0.857552	-8.6363	40.88
4	0.861381	-8.64325	38.39
4	0.865209	-8.65012	36.23
4	0.869037	-8.6569	34.36
4	0.872866	-8.66359	32.74
4	0.876694	-8.6702	31.34
4	0.880522	-8.67671	30.14
4	0.884351	-8.68313	29.11
4	0.888179	-8.68947	28.22
4	0.892007	-8.69571	27.47
4	0.895836	-8.70187	26.83
4	0.899664	-8.70793	26.29
4	0.903492	-8.71391	25.84
4	0.907321	-8.71979	25.46
4	0.911149	-8.72559	25.14
4	0.914978	-8.7313	24.87
4	0.918806	-8.73691	24.65
4	0.922634	-8.74244	24.46
4	0.926463	-8.74787	24.3
4	0.930291	-8.75322	24.15
4	0.934119	-8.75848	24.03
4	0.937948	-8.76364	23.91
4	0.941776	-8.76872	23.79
4	0.945604	-8.7737	23.67
4	0.949433	-8.7786	23.54
4	0.953261	-8.78341	23.4
4	0.957089	-8.78812	23.25
4	0.960918	-8.79274	23.08
4	0.964746	-8.79728	22.89
4	0.968575	-8.80172	22.67
4	0.972403	-8.80607	22.43
4	0.976231	-8.81033	22.15
4	0.98006	-8.8145	21.85
4	0.983888	-8.81858	21.52
4	0.987716	-8.82257	21.15
4	0.991545	-8.82646	20.76
4	0.995373	-8.83026	20.33
4	0.999201	-8.83396	19.86
4	1.00303	-8.83758	19.37
4	1.00686	-8.8411	18.84
4	1.01069	-8.84452	18.28
4	1.01451	-8.84785	17.7
4	1.01834	-8.85109	17.08
4	1.02217	-8.85423	16.44
4	1.026	-8.85727	15.78
4	1.02983	-8.86022	15.09
4	1.03366	-8.86307	14.39
4	1.03749	-8.86582	13.67
4	1.04131	-8.86847	12.94
4	1.04514	-8.87103	12.19
4	1.04897	-8.87348	11.44
4	1.0528	-8.87584	10.69
4	1.05663	-8.87809	9.935
4	1.06046	-8.88025	9.185
4	1.06428	-8.8823	8.442
4	1.06811	-8.88425	7.71
4	1.07194	-8.8861	6.992
4	1.07577	-8.88785	6.293
4	1.0796	-8.88949	5.615
4	1.08343	-8.89103	4.962
4	1.08725	-8.89246	4.338
4	1.09108	-8.8938	3.745
4	1.09491	-8.89502	3.187
4	1.09874	-8.89614	2.668
4	1.10257	-8.89716	2.188
4	1.1064	-8.89806	1.752
4	1.11022	-8.89887	1.362
4	1.11405	-8.89956	1.019
4	1.11788	-8.90015	0.7258
4	1.12171	-8.90063	0.4836
4	1.12554	-8.90101	0.2939
4	1.12937	-8.90128	0.1576
4	1.13319	-8.90144	0.07549
4	1.13702	-8.90149	0.04808
4	1.13702	-8.90149	0.04808
4	1.14365	-8.8913	-0.00126
4	1.15028	-8.86837	-0.05112
4	1.15692	-8.84071	-0.08405
4	1.16355	-8.81122	-0.1156
4	1.17018	-8.78095	-0.1536
4	1.17681	-8.75036	-0.2041
4	1.18344	-8.71977	-0.2747
4	1.19007	-8.68941	-0.3765
4	1.1967	-8.65957	-0.527
4	1.20333	-8.63059	-0.7524
4	1.20996	-8.60296	-1.09
4	1.21659	-8.57734	-1.581
4	1.22322	-8.55469	-2.236
4	1.22986	-8.53619	-2.957
4	1.23649	-8.52308	-3.473
4	1.24312	-8.51613	-3.501
4	1.24975	-8.51524	-3.055
4	1.25638	-8.51953	-2.412
4	1.26301	-8.52778	-1.813
4	1.26964	-8.53891	-1.346
4	1.27627	-8.55207	-1.007
4	1.2829	-8.56667	-0.7673
4	1.28953	-8.58229	-0.5961
4	1.29616	-8.59864	-0.4724
4	1.3028	-8.61553	-0.3811
4	1.30943	-8.63278	-0.3123
4	1.31606	-8.65031	-0.2595
4	1.32269	-8.66801	-0.2181
4	1.32932	-8.68583	-0.1852
4	1.33595	-8.70371	-0.1586
4	1.34258	-8.7216	-0.1367
4	1.34921	-8.73946	-0.1186
4	1.35584	-8.75728	-0.1033
4	1.36247	-8.77501	-0.0904
4	1.3691	-8.79265	-0.0793
4	1.37574	-8.81015	-0.0697
4	1.38237	-8.82752	-0.06131
4	1.389	-8.84473	-0.05393
4	1.39563	-8.86178	-0.04737
4	1.40226	-8.87864	-0.0415
4	1.40889	-8.8953	-0.0362
4	1.41552	-8.91177	-0.03139
4	1.42215	-8.92803	-0.02699
4	1.42878	-8.94407	-0.02293
4	1.43541	-8.95988	-0.01916
4	1.44204	-8.97547	-0.01564
4	1.44868	-8.99083	-0.01234
4	1.45531	-9.00595	-0.009219
4	1.46194	-9.02084	-0.006266
4	1.46857	-9.03548	-0.003456
4	1.4752	-9.04988	-0.000776
4	1.48183	-9.06404	0.001788
4	1.48846	-9.07795	0.004246
4	1.49509	-9.09161	0.006604
4	1.50172	-9.10502	0.00887
4	1.50835	-9.11819	0.01105
4	1.51498	-9.13109	0.01314
4	1.52162	-9.14375	0.01516
4	1.52825	-9.15615	0.01709
4	1.53488	-9.16828	0.01895
4	1.54151	-9.18016	0.02074
4	1.54814	-9.19177	0.02245
4	1.55477	-9.20311	0.0241
4	1.5614	-9.21418	0.02569
4	1.56803	-9.22498	0.02721
4	1.57466	-9.23549	0.02868
4	1.58129	-9.24573	0.0301
4	1.58792	-9.25567	0.03148
4	1.59456	-9.26532	0.03281
4	1.60119	-9.27468	0.0341
4	1.60782	-9.28373	0.03536
4	1.61445	-9.29247	0.0366
4	1.62108	-9.30091	0.03782
4	1.62771	-9.30903	0.03902
4	1.63434	-9.31684	0.04021
4	1.64097	-9.32432	0.04139
4	1.6476	-9.33148	0.04256
4	1.65423	-9.33832	0.04374
4	1.66086	-9.34483	0.04491
4	1.6675	-9.35101	0.04607
4	1.67413	-9.35686	0.04724
4	1.68076	-9.36238	0.0484
4	1.68739	-9.36757	0.04955
4	1.69402	-9.37244	0.05069
4	1.70065	-9.37697	0.0518
4	1.70728	-9.38118	0.0529
4	1.71391	-9.38507	0.05396
4	1.72054	-9.38863	0.05498
4	1.72717	-9.39188	0.05595
4	1.7338	-9.3948	0.05686
4	1.74044	-9.39741	0.05771
4	1.74707	-9.39971	0.05848
4	1.7537	-9.40169	0.05917
4	1.76033	-9.40337	0.05976
4	1.76696	-9.40473	0.06026
4	1.77359	-9.4058	0.06066
4	1.78022	-9.40655	0.06094
4	1.78685	-9.40701	0.06111
4	1.79348	-9.40716	0.06117
5	0	-7.70643	0.004
5	0.00765672	-7.7062	0.003995
5	0.0153134	-7.70554	0.003978
5	0.0229702	-7.70443	0.003953
5	0.0306269	-7.70288	0.003918
5	0.0382836	-7.70089	0.003878
5	0.0459403	-7.69847	0.003833
5	0.053597	-7.69563	0.003787
5	0.0612537	-7.69237	0.003742
5	0.0689104	-7.68869	0.003701
5	0.0765672	-7.6846	0.003668
5	0.0842239	-7.68012	0.003646
5	0.0918806	-7.67524	0.003638
5	0.0995373	-7.66997	0.003645
5	0.107194	-7.66431	0.003671
5	0.114851	-7.65827	0.003717
5	0.122507	-7.65186	0.003783
5	0.130164	-7.64507	0.003871
5	0.137821	-7.63791	0.003979
5	0.145478	-7.63037	0.004106
5	0.153134	-7.62245	0.00425
5	0.160791	-7.61416	0.004407
5	0.168448	-7.60548	0.004574
5	0.176104	-7.59642	0.004745
5	0.183761	-7.58697	0.004915
5	0.191418	-7.57713	0.005077
5	0.199075	-7.5669	0.005224
5	0.206731	-7.55627	0.005348
5	0.214388	-7.54524	0.00544
5	0.222045	-7.53381	0.005491
5	0.229701	-7.52199	0.005491
5	0.237358	-7.50977	0.005429
5	0.245015	-7.49716	0.005294
5	0.252672	-7.48417	0.005073
5	0.260328	-7.4708	0.004751
5	0.267985	-7.45707	0.004312
5	0.275642	-7.44299	0.003738
5	0.283298	-7.42856	0.003008
5	0.290955	-7.41381	0.002099
5	0.298612	-7.39875	0.0009938
5	0.306269	-7.3834	-0.0003094
5	0.313925	-7.36777	-0.001761
5	0.321582	-7.35189	-0.003171
5	0.329239	-7.33578	-0.003958
5	0.336896	-7.31944	-0.00243
5	0.344552	-7.30292	0.006521
5	0.352209	-7.28621	0.03982
5	0.359866	-7.26935	0.1636
5	0.367522	-7.25236	0.7176
5	0.375179	-7.23526	4.648
5	0.382836	-7.21817	119.8
5	0.390493	-7.21741	-535.3
5	0.398149	-7.24132	-20.5
5	0.405806	-7.26565	-7.08
5	0.413463	-7.29023	-4.908
5	0.421119	-7.31502	-4.622
5	0.428776	-7.33999	-5.006
5	0.436433	-7.36511	-5.809
5	0.44409	-7.39036	-7.009
5	0.451746	-7.41572	-8.679
5	0.459403	-7.44116	-10.97
5	0.46706	-7.46665	-14.14
5	0.474716	-7.49218	-18.6
5	0.482373	-7.51771	-25.02
5	0.49003	-7.54323	-34.53
5	0.497687	-7.56869	-49.19
5	0.505343	-7.59409	-72.8
5	0.513	-7.61939	-113.1
5	0.520657	-7.64455	-187.2
5	0.528313	-7.66956	-337.7
5	0.53597	-7.69438	-689.6
5	0.543627	-7.71898	-1710
5	0.551284	-7.74338	-5952
5	0.55894	-7.76775	-39050
5	0.566597	-7.79389	-121200
5	0.574254	-7.82358	-14590
5	0.58191	-7.85381	-3010
5	0.589567	-7.88383	-984.7
5	0.597224	-7.91354	-404.2
5	0.604881	-7.94291	-184.9
5	0.612537	-7.97192	-87.65
5	0.620194	-8.00056	-40.86
5	0.627851	-8.02883	-18.93
5	0.635507	-8.05673	-12.01
5	0.643164	-8.08426	-17.12
5	0.650821	-8.11141	-35.68
5	0.658478	-8.13818	-74.07
5	0.666134	-8.16457	-147.4
5	0.673791	-8.19057	-290.8
5	0.681448	-8.21616	-590.7
5	0.689104	-8.24133	-1291
5	0.696761	-8.26603	-3198
5	0.704418	-8.29012	-9476
5	0.712075	-8.31321	-30680
5	0.719731	-8.33435	-45650
5	0.727388	-8.35332	-19340
5	0.735045	-8.37129	-7200
5	0.742701	-8.3887	-3607
5	0.750358	-8.40501	-3121
5	0.758015	-8.41527	-5821
5	0.758015	-8.41527	-5821
5	0.761843	-8.4098	-2439
5	0.765672	-8.39562	-415.4
5	0.7695	-8.37817	-100.8
5	0.773328	-8.35965	-36.75
5	0.777157	-8.3407	-17.29
5	0.780985	-8.32155	-9.358
5	0.784813	-8.30233	-5.349
5	0.788642	-8.28309	-2.93
5	0.79247	-8.26386	-1.203
5	0.796298	-8.24468	0.2591
5	0.800127	-8.22557	1.721
5	0.803955	-8.20655	3.405
5	0.807784	-8.18766	5.572
5	0.811612	-8.16891	8.596
5	0.81544	-8.15032	13.09
5	0.819269	-8.13194	20.17
5	0.823097	-8.11379	31.94
5	0.826925	-8.09591	52.8
5	0.830754	-8.07836	92.78
5	0.834582	-8.0612	177.4
5	0.83841	-8.04455	382.3
5	0.842239	-8.02865	975.8
5	0.846067	-8.01411	3077
5	0.849895	-8.00285	9279
5	0.853724	-7.9987	8354
5	0.857552	-8.00068	2895
5	0.861381	-8.00489	1083
5	0.865209	-8.00981	500.2
5	0.869037	-8.01497	271.5
5	0.872866	-8.0202	165.2
5	0.876694	-8.02543	109.3
5	0.880522	-8.03062	76.95
5	0.884351	-8.03575	56.87
5	0.888179	-8.04079	43.68
5	0.892007	-8.04576	34.61
5	0.895836	-8.05063	28.14
5	0.899664	-8.0554	23.38
5	0.903492	-8.06008	19.79
5	0.907321	-8.06466	17.01
5	0.911149	-8.06913	14.82
5	0.914978	-8.0735	13.07
5	0.918806	-8.07777	11.65
5	0.922634	-8.08193	10.48
5	0.926463	-8.08599	9.508
5	0.930291	-8.08995	8.69
5	0.934119	-8.09381	7.997
5	0.937948	-8.09757	7.404
5	0.941776	-8.10123	6.893
5	0.945604	-8.1048	6.45
5	0.949433	-8.10827	6.064
5	0.953261	-8.11166	5.725
5	0.957089	-8.11495	5.426
5	0.960918	-8.11816	5.161
5	0.964746	-8.12128	4.924
5	0.968575	-8.12432	4.713
5	0.972403	-8.12729	4.523
5	0.976231	-8.13018	4.351
5	0.98006	-8.13299	4.196
5	0.983888	-8.13573	4.055
5	0.987716	-8.1384	3.926
5	0.991545	-8.14101	3.808
5	0.995373	-8.14355	3.699
5	0.999201	-8.14603	3.598
5	1.00303	-8.14844	3.505
5	1.00686	-8.1508	3.419
5	1.01069	-8.15309	3.338
5	1.01451	-8.15533	3.262
5	1.01834	-8.15752	3.192
5	1.02217	-8.15964	3.125
5	1.026	-8.16171	3.062
5	1.02983	-8.16373	3.002
5	1.03366	-8.16569	2.946
5	1.03749	-8.1676	2.893
5	1.04131	-8.16945	2.842
5	1.04514	-8.17124	2.793
5	1.04897	-8.17298	2.747
5	1.0528	-8.17465	2.703
5	1.05663	-8.17627	2.662
5	1.06046	-8.17783	2.622
5	1.06428	-8.17933	2.584
5	1.06811	-8.18076	2.549
5	1.07194	-8.18213	2.515
5	1.07577	-8.18343	2.483
5	1.0796	-8.18467	2.453
5	1.08343	-8.18583	2.425
5	1.08725	-8.18693	2.398
5	1.09108	-8.18795	2.374
5	1.09491	-8.18889	2.351
5	1.09874	-8.18976	2.331
5	1.10257	-8.19055	2.312
5	1.1064	-8.19127	2.295
5	1.11022	-8.1919	2.28
5	1.11405	-8.19245	2.267
5	1.11788	-8.19292	2.256
5	1.12171	-8.1933	2.247
5	1.12554	-8.1936	2.24
5	1.12937	-8.19381	2.235
5	1.13319	-8.19394	2.232
5	1.13702	-8.19398	2.231
5	1.13702	-8.19398	2.231
5	1.14365	-8.195	2.195
5	1.15028	-8.19802	2.092
5	1.15692	-8.20291	1.934
5	1.16355	-8.2095	1.735
5	1.17018	-8.21756	1.51
5	1.17681	-8.22682	1.27
5	1.18344	-8.23697	1.017
5	1.19007	-8.24767	0.7476
5	1.1967	-8.25855	0.4471
5	1.20333	-8.26915	0.08986
5	1.20996	-8.27886	-0.362
5	1.21659	-8.28693	-0.9511
5	1.22322	-8.29232	-1.691
5	1.22986	-8.29377	-2.484
5	1.23649	-8.28999	-3.062
5	1.24312	-8.28014	-3.143
5	1.24975	-8.26427	-2.742
5	1.25638	-8.24325	-2.138
5	1.26301	-8.21825	-1.573
5	1.26964	-8.19033	-1.136
5	1.27627	-8.16031	-0.8235
5	1.2829	-8.12877	-0.6059
5	1.28953	-8.09611	-0.4546
5	1.29616	-8.06261	-0.3484
5	1.3028	-8.02846	-0.2728
5	1.30943	-7.99381	-0.2179
5	1.31606	-7.95877	-0.1776
5	1.32269	-7.92341	-0.1474
5	1.32932	-7.88782	-0.1246
5	1.33595	-7.85204	-0.1072
5	1.34258	-7.81612	-0.09361
5	1.34921	-7.78011	-0.08297
5	1.35584	-7.74405	-0.07447
5	1.36247	-7.70797	-0.06752
5	1.3691	-7.67192	-0.0616
5	1.37574	-7.63592	-0.05618
5	1.38237	-7.60003	-0.05065
5	1.389	-7.56427	-0.04412
5	1.39563	-7.52869	-0.03501
5	1.40226	-7.49332	-0.02019
5	1.40889	-7.45822	0.007733
5	1.41552	-7.42342	0.06937
5	1.42215	-7.38898	0.2386
5	1.42878	-7.35497	0.9169
5	1.43541	-7.32152	7.516
5	1.44204	-7.29323	-1169
5	1.44868	-7.30498	-4.973
5	1.45531	-7.3191	-0.6524
5	1.46194	-7.33317	-0.1937
5	1.46857	-7.34709	-0.08214
5	1.4752	-7.36084	-0.04238
5	1.48183	-7.37441	-0.02455
5	1.48846	-7.38778	-0.01522
5	1.49509	-7.40094	-0.009756
5	1.50172	-7.41388	-0.006286
5	1.50835	-7.42658	-0.003942
5	1.51498	-7.43905	-0.002284
5	1.52162	-7.45126	-0.001068
5	1.52825	-7.46321	-0.0001543
5	1.53488	-7.4749	0.0005465
5	1.54151	-7.48632	0.001092
5	1.54814	-7.49746	0.00152
5	1.55477	-7.50832	0.001859
5	1.5614	-7.51889	0.002129
5	1.56803	-7.52918	0.002345
5	1.57466	-7.53917	0.002518
5	1.58129	-7.54887	0.002657
5	1.58792	-7.55828	0.00277
5	1.59456	-7.5674	0.002861
5	1.60119	-7.57623	0.002936
5	1.60782	-7.58477	0.002999
5	1.61445	-7.59302	0.003052
5	1.62108	-7.60099	0.003098
5	1.62771	-7.60867	0.00314
5	1.63434	-7.61606	0.003179
5	1.64097	-7.62318	0.003216
5	1.6476	-7.63001	0.003254
5	1.65423	-7.63657	0.003291
5	1.66086	-7.64285	0.00333
5	1.6675	-7.64884	0.003369
5	1.67413	-7.65456	0.003411
5	1.68076	-7.66	0.003453
5	1.68739	-7.66515	0.003497
5	1.69402	-7.67002	0.003542
5	1.70065	-7.67461	0.003587
5	1.70728	-7.6789	0.003633
5	1.71391	-7.68289	0.003678
5	1.72054	-7.68659	0.003722
5	1.72717	-7.68998	0.003765
5	1.7338	-7.69307	0.003805
5	1.74044	-7.69585	0.003843
5	1.74707	-7.69831	0.003878
5	1.7537	-7.70045	0.003909
5	1.76033	-7.70227	0.003936
5	1.76696	-7.70376	0.003959
5	1.77359	-7.70493	0.003977
5	1.78022	-7.70576	0.00399
5	1.78685	-7.70626	0.003997
5	1.79348	-7.70643	0.004
6	0	-7.70623	-0.003999
6	0.00765672	-7.706	-0.003994
6	0.0153134	-7.70534	-0.003978
6	0.0229702	-7.70423	-0.003952
6	0.0306269	-7.70268	-0.003918
6	0.0382836	-7.70069	-0.003877
6	0.0459403	-7.69827	-0.003832
6	0.053597	-7.69543	-0.003786
6	0.0612537	-7.69217	-0.003741
6	0.0689104	-7.68849	-0.0037
6	0.0765672	-7.6844	-0.003668
6	0.0842239	-7.67992	-0.003645
6	0.0918806	-7.67504	-0.003637
6	0.0995373	-7.66977	-0.003644
6	0.107194	-7.66411	-0.00367
6	0.114851	-7.65807	-0.003716
6	0.122507	-7.65166	-0.003782
6	0.130164	-7.64487	-0.00387
6	0.137821	-7.63771	-0.003978
6	0.145478	-7.63017	-0.004105
6	0.153134	-7.62225	-0.004249
6	0.160791	-7.61396	-0.004406
6	0.168448	-7.60528	-0.004573
6	0.176104	-7.59622	-0.004744
6	0.183761	-7.58677	-0.004914
6	0.191418	-7.57693	-0.005076
6	0.199075	-7.5667	-0.005223
6	0.206731	-7.55607	-0.005347
6	0.214388	-7.54504	-0.005438
6	0.222045	-7.53361	-0.005489
6	0.229701	-7.52179	-0.005489
6	0.237358	-7.50957	-0.005427
6	0.245015	-7.49696	-0.005291
6	0.252672	-7.48397	-0.00507
6	0.260328	-7.4706	-0.004748
6	0.267985	-7.45687	-0.004309
6	0.275642	-7.44279	-0.003734
6	0.283298	-7.42836	-0.003003
6	0.290955	-7.41361	-0.002093
6	0.298612	-7.39855	-0.0009877
6	0.306269	-7.3832	0.0003154
6	0.313925	-7.36757	0.001766
6	0.321582	-7.35169	0.00317
6	0.329239	-7.33558	0.003939
6	0.336896	-7.31925	0.002364
6	0.344552	-7.30272	-0.006723
6	0.352209	-7.28601	-0.04046
6	0.359866	-7.26915	-0.1659
6	0.367522	-7.25216	-0.729
6	0.375179	-7.23506	-4.751
6	0.382836	-7.21797	-125.9
6	0.390493	-7.21722	571.3
6	0.398149	-7.24112	20.85
6	0.405806	-7.26545	7.131
6	0.413463	-7.29003	4.923
6	0.421119	-7.31482	4.628
6	0.428776	-7.33979	5.009
6	0.436433	-7.36491	5.812
6	0.44409	-7.39016	7.011
6	0.451746	-7.41552	8.68
6	0.459403	-7.44096	10.97
6	0.46706	-7.46645	14.14
6	0.474716	-7.49198	18.6
6	0.482373	-7.51751	25.02
6	0.49003	-7.54303	34.54
6	0.497687	-7.56849	49.19
6	0.505343	-7.59389	72.81
6	0.513	-7.61919	113.1
6	0.520657	-7.64435	187.2
6	0.528313	-7.66936	337.7
6	0.53597	-7.69418	689.6
6	0.543627	-7.71878	1710
6	0.551284	-7.74318	5952
6	0.55894	-7.76755	39050
6	0.566597	-7.79369	121200
6	0.574254	-7.82338	14590
6	0.58191	-7.85361	3010
6	0.589567	-7.88363	984.7
6	0.597224	-7.91334	404.2
6	0.604881	-7.94271	184.9
6	0.612537	-7.97172	87.65
6	0.620194	-8.00036	40.86
6	0.627851	-8.02863	18.93
6	0.635507	-8.05653	12.01
6	0.643164	-8.08406	17.12
6	0.650821	-8.11121	35.68
6	0.658478	-8.13798	74.07
6	0.666134	-8.16437	147.4
6	0.673791	-8.19037	290.8
6	0.681448	-8.21596	590.7
6	0.689104	-8.24113	1291
6	0.696761	-8.26583	3198
6	0.704418	-8.28992	9476
6	0.712075	-8.31301	30680
6	0.719731	-8.33415	45650
6	0.727388	-8.35312	19340
6	0.735045	-8.37109	7200
6	0.742701	-8.3885	3607
6	0.750358	-8.40481	3121
6	0.758015	-8.41507	5821
6	0.758015	-8.41507	5821
6	0.761843	-8.4096	2439
6	0.765672	-8.39542	415.4
6	0.7695	-8.37797	100.8
6	0.773328	-8.35945	36.75
6	0.777157	-8.3405	17.29
6	0.780985	-8.32135	9.358
6	0.784813	-8.30213	5.349
6	0.788642	-8.28289	2.93
6	0.79247	-8.26366	1.203
6	0.796298	-8.24448	-0.2591
6	0.800127	-8.22537	-1.721
6	0.803955	-8.20635	-3.405
6	0.807784	-8.18746	-5.572
6	0.811612	-8.16871	-8.596
6	0.81544	-8.15012	-13.09
6	0.819269	-8.13174	-20.17
6	0.823097	-8.11359	-31.94
6	0.826925	-8.09571	-52.81
6	0.830754	-8.07816	-92.78
6	0.834582	-8.061	-177.4
6	0.83841	-8.04435	-382.3
6	0.842239	-8.02845	-975.9
6	0.846067	-8.01391	-3077
6	0.849895	-8.00265	-9279
6	0.853724	-7.9985	-8354
6	0.857552	-8.00048	-2895
6	0.861381	-8.00469	-1083
6	0.865209	-8.00961	-500.2
6	0.869037	-8.01477	-271.5
6	0.872866	-8.02	-165.2
6	0.876694	-8.02523	-109.3
6	0.880522	-8.03042	-76.95
6	0.884351	-8.03555	-56.87
6	0.888179	-8.04059	-43.68
6	0.892007	-8.04556	-34.61
6	0.895836	-8.05043	-28.14
6	0.899664	-8.0552	-23.38
6	0.903492	-8.05988	-19.79
6	0.907321	-8.06446	-17.01
6	0.911149	-8.06893	-14.82
6	0.914978	-8.0733	-13.07
6	0.918806	-8.07757	-11.65
6	0.922634	-8.08173	-10.48
6	0.926463	-8.08579	-9.508
6	0.930291	-8.08975	-8.69
6	0.934119	-8.09361	-7.997
6	0.937948	-8.09737	-7.404
6	0.941776	-8.10103	-6.893
6	0.945604	-8.1046	-6.451
6	0.949433	-8.10807	-6.064
6	0.953261	-8.11146	-5.725
6	0.957089	-8.11475	-5.426
6	0.960918	-8.11796	-5.161
6	0.964746	-8.12108	-4.924
6	0.968575	-8.12412	-4.713
6	0.972403	-8.12709	-4.523
6	0.976231	-8.12998	-4.351
6	0.98006	-8.13279	-4.196
6	0.983888	-8.13553	-4.055
6	0.987716	-8.1382	-3.926
6	0.991545	-8.14081	-3.808
6	0.995373	-8.14335	-3.699
6	0.999201	-8.14583	-3.598
6	1.00303	-8.14824	-3.505
6	1.00686	-8.1506	-3.419
6	1.01069	-8.15289	-3.338
6	1.01451	-8.15513	-3.262
6	1.01834	-8.15732	-3.192
6	1.02217	-8.15944	-3.125
6	1.026	-8.16151	-3.062
6	1.02983	-8.16353	-3.002
6	1.03366	-8.16549	-2.946
6	1.03749	-8.1674	-2.893
6	1.04131	-8.16925	-2.842
6	1.04514	-8.17104	-2.793
6	1.04897	-8.17278	-2.747
6	1.0528	-8.17445	-2.703
6	1.05663	-8.17607	-2.662
6	1.06046	-8.17763	-2.622
6	1.06428	-8.17913	-2.585
6	1.06811	-8.18056	-2.549
6	1.07194	-8.18193	-2.515
6	1.07577	-8.18323	-2.483
6	1.0796	-8.18447	-2.453
6	1.08343	-8.18563	-2.425
6	1.08725	-8.18673	-2.398
6	1.09108	-8.18775	-2.374
6	1.09491	-8.18869	-2.351
6	1.09874	-8.18956	-2.331
6	1.10257	-8.19035	-2.312
6	1.1064	-8.19107	-2.295
6	1.11022	-8.1917	-2.28
6	1.11405	-8.19225	-2.267
6	1.11788	-8.19272	-2.256
6	1.12171	-8.1931	-2.247
6	1.12554	-8.1934	-2.24
6	1.12937	-8.19361	-2.235
6	1.13319	-8.19374	-2.232
6	1.13702	-8.19378	-2.231
6	1.13702	-8.19378	-2.231
6	1.14365	-8.1948	-2.195
6	1.15028	-8.19782	-2.092
6	1.15692	-8.20271	-1.934
6	1.16355	-8.2093	-1.735
6	1.17018	-8.21736	-1.51
6	1.17681	-8.22662	-1.27
6	1.18344	-8.23677	-1.017
6	1.19007	-8.24747	-0.7476
6	1.1967	-8.25835	-0.4471
6	1.20333	-8.26895	-0.08986
6	1.20996	-8.27866	0.362
6	1.21659	-8.28673	0.9511
6	1.22322	-8.29212	1.691
6	1.22986	-8.29357	2.484
6	1.23649	-8.28979	3.062
6	1.24312	-8.27994	3.143
6	1.24975	-8.26407	2.742
6	1.25638	-8.24305	2.138
6	1.26301	-8.21805	1.573
6	1.26964	-8.19013	1.136
6	1.27627	-8.16011	0.8235
6	1.2829	-8.12857	0.6059
6	1.28953	-8.09591	0.4546
6	1.29616	-8.06241	0.3484
6	1.3028	-8.02826	0.2728
6	1.30943	-7.99361	0.2179
6	1.31606	-7.95857	0.1776
6	1.32269	-7.92321	0.1474
6	1.32932	-7.88762	0.1246
6	1.33595	-7.85184	0.1072
6	1.34258	-7.81592	0.0936
6	1.34921	-7.77991	0.08296
6	1.35584	-7.74385	0.07446
6	1.36247	-7.70777	0.06751
6	1.3691	-7.67172	0.06158
6	1.37574	-7.63573	0.05615
6	1.38237	-7.59983	0.05061
6	1.389	-7.56407	0.04406
6	1.39563	-7.52849	0.03491
6	1.40226	-7.49312	0.02001
6	1.40889	-7.45802	-0.008102
6	1.41552	-7.42322	-0.07023
6	1.42215	-7.38878	-0.2412
6	1.42878	-7.35477	-0.9296
6	1.43541	-7.32132	-7.713
6	1.44204	-7.29317	1215
6	1.44868	-7.30479	5.091
6	1.45531	-7.3189	0.6602
6	1.46194	-7.33297	0.1952
6	1.46857	-7.34689	0.0826
6	1.4752	-7.36064	0.04256
6	1.48183	-7.37421	0.02464
6	1.48846	-7.38758	0.01526
6	1.49509	-7.40074	0.009785
6	1.50172	-7.41368	0.006305
6	1.50835	-7.42638	0.003956
6	1.51498	-7.43885	0.002293
6	1.52162	-7.45106	0.001076
6	1.52825	-7.46301	0.0001601
6	1.53488	-7.4747	-0.0005418
6	1.54151	-7.48612	-0.001088
6	1.54814	-7.49726	-0.001517
6	1.55477	-7.50812	-0.001856
6	1.5614	-7.51869	-0.002127
6	1.56803	-7.52898	-0.002343
6	1.57466	-7.53897	-0.002516
6	1.58129	-7.54867	-0.002656
6	1.58792	-7.55808	-0.002768
6	1.59456	-7.5672	-0.00286
6	1.60119	-7.57603	-0.002935
6	1.60782	-7.58457	-0.002997
6	1.61445	-7.59282	-0.00305
6	1.62108	-7.60079	-0.003097
6	1.62771	-7.60847	-0.003139
6	1.63434	-7.61586	-0.003178
6	1.64097	-7.62298	-0.003215
6	1.6476	-7.62981	-0.003253
6	1.65423	-7.63637	-0.00329
6	1.66086	-7.64265	-0.003329
6	1.6675	-7.64864	-0.003369
6	1.67413	-7.65436	-0.00341
6	1.68076	-7.6598	-0.003452
6	1.68739	-7.66495	-0.003496
6	1.69402	-7.66982	-0.003541
6	1.70065	-7.67441	-0.003587
6	1.70728	-7.6787	-0.003632
6	1.71391	-7.68269	-0.003677
6	1.72054	-7.68639	-0.003721
6	1.72717	-7.68978	-0.003764
6	1.7338	-7.69287	-0.003805
6	1.74044	-7.69565	-0.003842
6	1.74707	-7.69811	-0.003877
6	1.7537	-7.70025	-0.003908
6	1.76033	-7.70207	-0.003935
6	1.76696	-7.70356	-0.003958
6	1.77359	-7.70473	-0.003976
6	1.78022	-7.70556	-0.003989
6	1.78685	-7.70606	-0.003997
6	1.79348	-7.70623	-0.003999
7	0	-6.60397	0.04219
7	0.00765672	-6.60417	0.04202
7	0.0153134	-6.60475	0.0415
7	0.0229702	-6.60571	0.04063
7	0.0306269	-6.60707	0.03941
7	0.0382836	-6.60882	0.03783
7	0.0459403	-6.61097	0.03588
7	0.053597	-6.61353	0.03354
7	0.0612537	-6.61649	0.03082
7	0.0689104	-6.61986	0.02768
7	0.0765672	-6.62366	0.02412
7	0.0842239	-6.62789	0.02011
7	0.0918806	-6.63255	0.01563
7	0.0995373	-6.63767	0.01066
7	0.107194	-6.64324	0.005167
7	0.114851	-6.64928	-0.0008726
7	0.122507	-6.65579	-0.007487
7	0.130164	-6.66279	-0.0147
7	0.137821	-6.6703	-0.02255
7	0.145478	-6.6783	-0.03104
7	0.153134	-6.68683	-0.04022
7	0.160791	-6.69589	-0.05009
7	0.168448	-6.70548	-0.06067
7	0.176104	-6.71562	-0.07198
7	0.183761	-6.72631	-0.08403
7	0.191418	-6.73756	-0.09681
7	0.199075	-6.74938	-0.1103
7	0.206731	-6.76176	-0.1246
7	0.214388	-6.77472	-0.1396
7	0.222045	-6.78825	-0.1553
7	0.229701	-6.80236	-0.1718
7	0.237358	-6.81704	-0.1891
7	0.245015	-6.83229	-0.2072
7	0.252672	-6.84811	-0.2262
7	0.260328	-6.86449	-0.2463
7	0.267985	-6.88143	-0.2677
7	0.275642	-6.89891	-0.2906
7	0.283298	-6.91692	-0.3155
7	0.290955	-6.93546	-0.3428
7	0.298612	-6.95451	-0.3734
7	0.306269	-6.97406	-0.4081
7	0.313925	-6.99409	-0.4481
7	0.321582	-7.01458	-0.4949
7	0.329239	-7.03553	-0.5499
7	0.336896	-7.05691	-0.6143
7	0.344552	-7.07871	-0.6865
7	0.352209	-7.10089	-0.7546
7	0.359866	-7.12345	-0.7586
7	0.367522	-7.14636	-0.3636
7	0.375179	-7.16958	3.433
7	0.382836	-7.19302	124.3
7	0.390493	-7.20034	-569.1
7	0.398149	-7.18328	-17.79
7	0.405806	-7.16619	-1.438
7	0.413463	-7.15016	19.23
7	0.421119	-7.15204	-7.385
7	0.428776	-7.1848	7.358
7	0.436433	-7.22012	6.583
7	0.44409	-7.25563	7.243
7	0.451746	-7.29105	8.691
7	0.459403	-7.3263	10.88
7	0.46706	-7.36136	13.99
7	0.474716	-7.39619	18.41
7	0.482373	-7.43077	24.8
7	0.49003	-7.46511	34.29
7	0.497687	-7.49917	48.93
7	0.505343	-7.53295	72.52
7	0.513	-7.56643	112.8
7	0.520657	-7.5996	186.9
7	0.528313	-7.63246	337.3
7	0.53597	-7.66498	689.2
7	0.543627	-7.69714	1710
7	0.551284	-7.72888	5952
7	0.55894	-7.75996	39050
7	0.566597	-7.78852	121200
7	0.574254	-7.81268	14590
7	0.58191	-7.83537	3008
7	0.589567	-7.85719	983
7	0.597224	-7.87809	401.9
7	0.604881	-7.89791	181.7
7	0.612537	-7.91638	82.99
7	0.620194	-7.93317	33.95
7	0.627851	-7.94785	8.336
7	0.635507	-7.95993	-4.812
7	0.643164	-7.96886	-10.61
7	0.650821	-7.97421	-11.76
7	0.658478	-7.97574	-9.998
7	0.666134	-7.97352	-6.591
7	0.673791	-7.96795	-2.397
7	0.681448	-7.95958	2.233
7	0.689104	-7.94904	7.459
7	0.696761	-7.93691	13.97
7	0.704418	-7.92365	23.21
7	0.712075	-7.90966	38.11
7	0.719731	-7.89524	65.49
7	0.727388	-7.88065	123.6
7	0.735045	-7.86614	272.4
7	0.742701	-7.8521	772.6
7	0.750358	-7.83958	3176
7	0.758015	-7.83317	9645
7	0.758015	-7.83317	9645
7	0.761843	-7.83499	6709
7	0.765672	-7.83946	3187
7	0.7695	-7.84521	1514
7	0.773328	-7.85153	793.8
7	0.777157	-7.85812	458.7
7	0.780985	-7.86485	286.9
7	0.784813	-7.87164	191
7	0.788642	-7.87846	133.5
7	0.79247	-7.88528	96.83
7	0.796298	-7.89208	72.22
7	0.800127	-7.89886	54.83
7	0.803955	-7.9056	41.83
7	0.807784	-7.9123	31.4
7	0.811612	-7.91895	22.2
7	0.81544	-7.92554	13
7	0.819269	-7.93206	2.283
7	0.823097	-7.93849	-12.36
7	0.826925	-7.94483	-35.52
7	0.830754	-7.95104	-77.35
7	0.834582	-7.95708	-163.5
7	0.83841	-7.96286	-369.6
7	0.842239	-7.96817	-964.3
7	0.846067	-7.97244	-3066
7	0.849895	-7.97377	-9270
7	0.853724	-7.96838	-8345
7	0.857552	-7.95727	-2887
7	0.861381	-7.94436	-1075
7	0.865209	-7.93121	-493
7	0.869037	-7.91831	-264.9
7	0.872866	-7.90584	-159.3
7	0.876694	-7.89389	-103.9
7	0.880522	-7.88251	-72.1
7	0.884351	-7.87172	-52.55
7	0.888179	-7.86152	-39.87
7	0.892007	-7.85191	-31.27
7	0.895836	-7.84289	-25.25
7	0.899664	-7.83442	-20.89
7	0.903492	-7.8265	-17.67
7	0.907321	-7.81909	-15.23
7	0.911149	-7.81216	-13.34
7	0.914978	-7.80569	-11.85
7	0.918806	-7.79965	-10.65
7	0.922634	-7.79401	-9.683
7	0.926463	-7.78874	-8.881
7	0.930291	-7.78382	-8.211
7	0.934119	-7.77921	-7.643
7	0.937948	-7.77491	-7.158
7	0.941776	-7.77088	-6.738
7	0.945604	-7.76711	-6.373
7	0.949433	-7.76357	-6.052
7	0.953261	-7.76026	-5.768
7	0.957089	-7.75715	-5.515
7	0.960918	-7.75424	-5.289
7	0.964746	-7.7515	-5.085
7	0.968575	-7.74894	-4.901
7	0.972403	-7.74653	-4.733
7	0.976231	-7.74427	-4.58
7	0.98006	-7.74215	-4.44
7	0.983888	-7.74016	-4.311
7	0.987716	-7.7383	-4.191
7	0.991545	-7.73655	-4.08
7	0.995373	-7.73491	-3.977
7	0.999201	-7.73338	-3.881
7	1.00303	-7.73194	-3.79
7	1.00686	-7.7306	-3.705
7	1.01069	-7.72935	-3.624
7	1.01451	-7.72818	-3.548
7	1.01834	-7.72709	-3.476
7	1.02217	-7.72607	-3.407
7	1.026	-7.72513	-3.341
7	1.02983	-7.72426	-3.278
7	1.03366	-7.72345	-3.218
7	1.03749	-7.7227	-3.161
7	1.04131	-7.72201	-3.106
7	1.04514	-7.72137	-3.053
7	1.04897	-7.72079	-3.002
7	1.0528	-7.72025	-2.954
7	1.05663	-7.71976	-2.907
7	1.06046	-7.71931	-2.863
7	1.06428	-7.7189	-2.82
7	1.06811	-7.71853	-2.78
7	1.07194	-7.7182	-2.741
7	1.07577	-7.71789	-2.705
7	1.0796	-7.71762	-2.67
7	1.08343	-7.71738	-2.638
7	1.08725	-7.71716	-2.607
7	1.09108	-7.71696	-2.579
7	1.09491	-7.71679	-2.553
7	1.09874	-7.71664	-2.529
7	1.10257	-7.71651	-2.507
7	1.1064	-7.7164	-2.487
7	1.11022	-7.7163	-2.47
7	1.11405	-7.71622	-2.455
7	1.11788	-7.71615	-2.442
7	1.12171	-7.71609	-2.431
7	1.12554	-7.71605	-2.423
7	1.12937	-7.71602	-2.417
[truncated: 33,402 more rows]

## Sheet: band density map for CEC
Band index	kx	ky	Energy
	Inverse angstrom	Inverse angstrom	eV
57	-0.4	0.358015	0.0955983
57	-0.4	0.361824	0.0975948
57	-0.4	0.365634	0.0992864
57	-0.4	0.369443	0.100642
57	-0.4	0.373253	0.101632
57	-0.4	0.377062	0.102233
57	-0.4	0.380872	0.102432
57	-0.4	0.384682	0.102229
57	-0.4	0.388491	0.101639
57	-0.4	0.392301	0.100693
57	-0.4	0.39611	0.0994304
57	-0.4	0.39992	0.0978982
57	-0.4	0.403729	0.0961447
57	-0.4	0.407539	0.0942159
57	-0.4	0.411348	0.0921536
57	-0.4	0.415158	0.0899951
57	-0.4	0.418967	0.0877729
57	-0.4	0.422777	0.0855148
57	-0.4	0.426586	0.0832448
57	-0.4	0.430396	0.0809842
57	-0.4	0.434205	0.0787517
57	-0.4	0.438015	0.076563
57	-0.4	0.441824	0.0744329
57	-0.4	0.445634	0.0723747
57	-0.4	0.449443	0.0703997
57	-0.4	0.453253	0.0685192
57	-0.4	0.457062	0.0667416
57	-0.4	0.460872	0.0650756
57	-0.4	0.464682	0.0635271
57	-0.4	0.468491	0.0621013
57	-0.4	0.472301	0.0608007
57	-0.4	0.47611	0.0596264
57	-0.4	0.47992	0.0585774
57	-0.4	0.483729	0.0576515
57	-0.4	0.487539	0.0568445
57	-0.4	0.491348	0.0561524
57	-0.4	0.495158	0.0555703
57	-0.4	0.498967	0.0550964
57	-0.4	0.502777	0.0547296
57	-0.4	0.506586	0.0544722
57	-0.4	0.510396	0.0543297
57	-0.4	0.514205	0.0543098
57	-0.4	0.518015	0.0544233
57	-0.4	0.521824	0.0546795
57	-0.4	0.525634	0.0550885
57	-0.4	0.529443	0.0556578
57	-0.4	0.533253	0.0563894
57	-0.4	0.537062	0.0572801
57	-0.4	0.540872	0.0583171
57	-0.4	0.544682	0.0594732
57	-0.4	0.548491	0.0607003
57	-0.4	0.552301	0.0619134
57	-0.4	0.55611	0.0629655
57	-0.4	0.55992	0.0636148
57	-0.4	0.563729	0.0635232
57	-0.4	0.567539	0.0623936
57	-0.4	0.571348	0.0601946
57	-0.4	0.575158	0.0571533
57	-0.4	0.578967	0.0535416
57	-0.4	0.582777	0.0495573
57	-0.4	0.586586	0.045324
57	-0.4	0.590396	0.040917
57	-0.4	0.594205	0.0363832
57	-0.4	0.598015	0.0317535
57	-0.4	0.601824	0.0270497
57	-0.4	0.605634	0.0222868
57	-0.4	0.609443	0.0174779
57	-0.4	0.613253	0.0126311
57	-0.4	0.617062	0.00775474
57	-0.4	0.620872	0.00285539
57	-0.4	0.624682	-0.00206109
57	-0.4	0.628491	-0.00699053
57	-0.4	0.632301	-0.011928
57	-0.4	0.63611	-0.0168703
57	-0.4	0.63992	-0.0218137
57	-0.4	0.643729	-0.0267547
57	-0.4	0.647539	-0.0316911
57	-0.4	0.651348	-0.0366198
57	-0.4	0.655158	-0.0415394
57	-0.4	0.658967	-0.0464467
57	-0.4	0.662777	-0.0513408
57	-0.4	0.666586	-0.0562197
57	-0.4	0.670396	-0.0610817
57	-0.4	0.674205	-0.065926
57	-0.4	0.678015	-0.0707511
57	-0.4	0.681824	-0.0755565
57	-0.4	0.685634	-0.0803409
57	-0.4	0.689443	-0.0851037
57	-0.4	0.693253	-0.0898443
57	-0.4	0.697062	-0.0945629
57	-0.4	0.700872	-0.0992583
57	-0.4	0.704682	-0.103932
57	-0.4	0.708491	-0.108581
57	-0.4	0.712301	-0.113207
57	-0.4	0.71611	-0.117811
57	-0.4	0.71992	-0.122392
57	-0.4	0.723729	-0.126952
57	-0.4	0.727539	-0.131489
57	-0.4	0.731348	-0.136005
57	-0.4	0.735158	-0.140501
57	-0.4	0.738967	-0.144976
57	-0.4	0.742777	-0.149432
57	-0.4	0.746586	-0.153869
57	-0.4	0.750396	-0.158289
57	-0.4	0.754205	-0.162693
57	-0.4	0.758015	-0.167081
57	-0.4	0.761824	-0.171454
57	-0.4	0.765634	-0.175815
57	-0.4	0.769443	-0.180163
57	-0.4	0.773253	-0.1845
57	-0.4	0.777062	-0.188827
57	-0.4	0.780872	-0.193146
57	-0.4	0.784682	-0.197456
57	-0.4	0.788491	-0.201762
57	-0.4	0.792301	-0.206062
57	-0.4	0.79611	-0.210358
57	-0.4	0.79992	-0.214651
57	-0.4	0.803729	-0.218943
57	-0.4	0.807539	-0.223235
57	-0.4	0.811348	-0.227528
57	-0.4	0.815158	-0.231822
57	-0.4	0.818967	-0.236119
57	-0.4	0.822777	-0.240419
57	-0.4	0.826586	-0.244723
57	-0.4	0.830396	-0.249032
57	-0.4	0.834205	-0.253346
57	-0.4	0.838015	-0.257666
57	-0.4	0.841824	-0.261992
57	-0.4	0.845634	-0.266324
57	-0.4	0.849443	-0.270662
57	-0.4	0.853253	-0.275007
57	-0.4	0.857062	-0.279358
57	-0.4	0.860872	-0.283715
57	-0.4	0.864682	-0.288077
57	-0.4	0.868491	-0.292444
57	-0.4	0.872301	-0.296815
57	-0.4	0.87611	-0.301189
57	-0.4	0.87992	-0.305566
57	-0.4	0.883729	-0.309943
57	-0.4	0.887539	-0.314322
57	-0.4	0.891348	-0.318699
57	-0.4	0.895158	-0.323074
57	-0.4	0.898967	-0.327445
57	-0.4	0.902777	-0.331811
57	-0.4	0.906586	-0.336169
57	-0.4	0.910396	-0.340519
57	-0.4	0.914205	-0.34486
57	-0.4	0.918015	-0.349187
57	-0.4	0.921824	-0.353501
57	-0.4	0.925634	-0.3578
57	-0.4	0.929443	-0.362081
57	-0.4	0.933253	-0.366344
57	-0.4	0.937062	-0.370586
57	-0.4	0.940872	-0.374805
57	-0.4	0.944682	-0.379001
57	-0.4	0.948491	-0.383171
57	-0.4	0.952301	-0.387313
57	-0.4	0.95611	-0.391427
57	-0.4	0.95992	-0.395512
57	-0.4	0.963729	-0.399566
57	-0.4	0.967539	-0.403586
57	-0.4	0.971348	-0.407574
57	-0.4	0.975158	-0.411527
57	-0.4	0.978967	-0.415444
57	-0.4	0.982777	-0.419326
57	-0.4	0.986586	-0.423171
57	-0.4	0.990396	-0.426979
57	-0.4	0.994205	-0.430749
57	-0.4	0.998015	-0.43448
57	-0.4	1.00182	-0.438173
57	-0.4	1.00563	-0.441826
57	-0.4	1.00944	-0.44544
57	-0.4	1.01325	-0.449014
57	-0.4	1.01706	-0.452548
57	-0.4	1.02087	-0.456042
57	-0.4	1.02468	-0.459495
57	-0.4	1.02849	-0.462907
57	-0.4	1.0323	-0.466276
57	-0.4	1.03611	-0.469603
57	-0.4	1.03992	-0.472887
57	-0.4	1.04373	-0.476126
57	-0.4	1.04754	-0.479321
57	-0.4	1.05135	-0.482467
57	-0.4	1.05516	-0.485567
57	-0.4	1.05897	-0.488614
57	-0.4	1.06278	-0.491608
57	-0.4	1.06659	-0.494547
57	-0.4	1.0704	-0.497425
57	-0.4	1.07421	-0.500239
57	-0.4	1.07801	-0.502985
57	-0.4	1.08182	-0.505656
57	-0.4	1.08563	-0.508244
57	-0.4	1.08944	-0.510745
57	-0.4	1.09325	-0.513146
57	-0.4	1.09706	-0.515438
57	-0.4	1.10087	-0.517608
57	-0.4	1.10468	-0.519642
57	-0.4	1.10849	-0.521524
57	-0.4	1.1123	-0.523236
57	-0.4	1.11611	-0.524757
57	-0.4	1.11992	-0.52607
57	-0.4	1.12373	-0.527152
57	-0.4	1.12754	-0.527982
57	-0.4	1.13135	-0.528545
57	-0.4	1.13516	-0.528828
57	-0.4	1.13897	-0.528825
57	-0.4	1.14278	-0.528536
57	-0.4	1.14659	-0.527967
57	-0.4	1.1504	-0.527131
57	-0.4	1.15421	-0.526045
57	-0.4	1.15801	-0.524728
57	-0.39619	0.358015	0.087882
57	-0.39619	0.361824	0.0902091
57	-0.39619	0.365634	0.0923003
57	-0.39619	0.369443	0.0941333
57	-0.39619	0.373253	0.0956837
57	-0.39619	0.377062	0.0969269
57	-0.39619	0.380872	0.0978416
57	-0.39619	0.384682	0.0984096
57	-0.39619	0.388491	0.0986203
57	-0.39619	0.392301	0.0984735
57	-0.39619	0.39611	0.0979811
57	-0.39619	0.39992	0.0971655
57	-0.39619	0.403729	0.0960583
57	-0.39619	0.407539	0.094698
57	-0.39619	0.411348	0.0931251
57	-0.39619	0.415158	0.0913807
57	-0.39619	0.418967	0.0895027
57	-0.39619	0.422777	0.0875268
57	-0.39619	0.426586	0.0854837
57	-0.39619	0.430396	0.0834016
57	-0.39619	0.434205	0.081304
57	-0.39619	0.438015	0.0792134
57	-0.39619	0.441824	0.0771475
57	-0.39619	0.445634	0.0751229
57	-0.39619	0.449443	0.0731549
57	-0.39619	0.453253	0.0712558
57	-0.39619	0.457062	0.0694375
57	-0.39619	0.460872	0.06771
57	-0.39619	0.464682	0.0660821
57	-0.39619	0.468491	0.0645608
57	-0.39619	0.472301	0.0631517
57	-0.39619	0.47611	0.061859
57	-0.39619	0.47992	0.0606852
57	-0.39619	0.483729	0.0596319
57	-0.39619	0.487539	0.0586983
57	-0.39619	0.491348	0.0578845
57	-0.39619	0.495158	0.0571894
57	-0.39619	0.498967	0.0566122
57	-0.39619	0.502777	0.0561534
57	-0.39619	0.506586	0.0558153
57	-0.39619	0.510396	0.0556013
57	-0.39619	0.514205	0.0555168
57	-0.39619	0.518015	0.0555683
57	-0.39619	0.521824	0.0557636
57	-0.39619	0.525634	0.0561081
57	-0.39619	0.529443	0.0566067
57	-0.39619	0.533253	0.0572598
57	-0.39619	0.537062	0.0580618
57	-0.39619	0.540872	0.0589966
57	-0.39619	0.544682	0.0600339
57	-0.39619	0.548491	0.0611157
57	-0.39619	0.552301	0.0621386
57	-0.39619	0.55611	0.0629185
57	-0.39619	0.55992	0.0631605
57	-0.39619	0.563729	0.0625123
57	-0.39619	0.567539	0.0607938
57	-0.39619	0.571348	0.058145
57	-0.39619	0.575158	0.0548461
57	-0.39619	0.578967	0.0511288
57	-0.39619	0.582777	0.0471389
57	-0.39619	0.586586	0.0429634
57	-0.39619	0.590396	0.0386548
57	-0.39619	0.594205	0.0342466
57	-0.39619	0.598015	0.029762
57	-0.39619	0.601824	0.0252167
57	-0.39619	0.605634	0.0206235
57	-0.39619	0.609443	0.0159915
57	-0.39619	0.613253	0.0113283
57	-0.39619	0.617062	0.00664042
57	-0.39619	0.620872	0.00193419
57	-0.39619	0.624682	-0.00278639
57	-0.39619	0.628491	-0.00751696
57	-0.39619	0.632301	-0.0122536
57	-0.39619	0.63611	-0.0169932
57	-0.39619	0.63992	-0.0217327
57	-0.39619	0.643729	-0.0264687
57	-0.39619	0.647539	-0.0311996
57	-0.39619	0.651348	-0.0359238
57	-0.39619	0.655158	-0.0406377
57	-0.39619	0.658967	-0.0453407
57	-0.39619	0.662777	-0.0500311
57	-0.39619	0.666586	-0.0547076
57	-0.39619	0.670396	-0.0593689
57	-0.39619	0.674205	-0.064014
57	-0.39619	0.678015	-0.068642
57	-0.39619	0.681824	-0.0732525
57	-0.39619	0.685634	-0.0778449
57	-0.39619	0.689443	-0.0824185
57	-0.39619	0.693253	-0.0869729
57	-0.39619	0.697062	-0.0915083
57	-0.39619	0.700872	-0.0960247
57	-0.39619	0.704682	-0.100522
57	-0.39619	0.708491	-0.105
57	-0.39619	0.712301	-0.109459
57	-0.39619	0.71611	-0.113899
57	-0.39619	0.71992	-0.118321
57	-0.39619	0.723729	-0.122726
57	-0.39619	0.727539	-0.127114
57	-0.39619	0.731348	-0.131485
57	-0.39619	0.735158	-0.135841
57	-0.39619	0.738967	-0.140181
57	-0.39619	0.742777	-0.144506
57	-0.39619	0.746586	-0.148819
57	-0.39619	0.750396	-0.153118
57	-0.39619	0.754205	-0.157407
57	-0.39619	0.758015	-0.161685
57	-0.39619	0.761824	-0.165953
57	-0.39619	0.765634	-0.170213
57	-0.39619	0.769443	-0.174466
57	-0.39619	0.773253	-0.178713
57	-0.39619	0.777062	-0.182954
57	-0.39619	0.780872	-0.187192
57	-0.39619	0.784682	-0.191426
57	-0.39619	0.788491	-0.195659
57	-0.39619	0.792301	-0.199892
57	-0.39619	0.79611	-0.204124
57	-0.39619	0.79992	-0.208359
57	-0.39619	0.803729	-0.212596
57	-0.39619	0.807539	-0.216837
57	-0.39619	0.811348	-0.221082
57	-0.39619	0.815158	-0.225332
57	-0.39619	0.818967	-0.229588
57	-0.39619	0.822777	-0.233852
57	-0.39619	0.826586	-0.238123
57	-0.39619	0.830396	-0.242401
57	-0.39619	0.834205	-0.246687
57	-0.39619	0.838015	-0.250982
57	-0.39619	0.841824	-0.255286
57	-0.39619	0.845634	-0.259598
57	-0.39619	0.849443	-0.263919
57	-0.39619	0.853253	-0.26825
57	-0.39619	0.857062	-0.272587
57	-0.39619	0.860872	-0.276933
57	-0.39619	0.864682	-0.281286
57	-0.39619	0.868491	-0.285646
57	-0.39619	0.872301	-0.290011
57	-0.39619	0.87611	-0.294381
57	-0.39619	0.87992	-0.298755
57	-0.39619	0.883729	-0.303132
57	-0.39619	0.887539	-0.307509
57	-0.39619	0.891348	-0.311888
57	-0.39619	0.895158	-0.316264
57	-0.39619	0.898967	-0.320638
57	-0.39619	0.902777	-0.325007
57	-0.39619	0.906586	-0.32937
57	-0.39619	0.910396	-0.333725
57	-0.39619	0.914205	-0.338071
57	-0.39619	0.918015	-0.342405
57	-0.39619	0.921824	-0.346726
57	-0.39619	0.925634	-0.351032
57	-0.39619	0.929443	-0.355321
57	-0.39619	0.933253	-0.359591
57	-0.39619	0.937062	-0.363841
57	-0.39619	0.940872	-0.368069
57	-0.39619	0.944682	-0.372273
57	-0.39619	0.948491	-0.376452
57	-0.39619	0.952301	-0.380604
57	-0.39619	0.95611	-0.384727
57	-0.39619	0.95992	-0.388821
57	-0.39619	0.963729	-0.392884
57	-0.39619	0.967539	-0.396914
57	-0.39619	0.971348	-0.400912
57	-0.39619	0.975158	-0.404876
57	-0.39619	0.978967	-0.408804
57	-0.39619	0.982777	-0.412696
57	-0.39619	0.986586	-0.416552
57	-0.39619	0.990396	-0.42037
57	-0.39619	0.994205	-0.424152
57	-0.39619	0.998015	-0.427895
57	-0.39619	1.00182	-0.4316
57	-0.39619	1.00563	-0.435266
57	-0.39619	1.00944	-0.438892
57	-0.39619	1.01325	-0.442479
57	-0.39619	1.01706	-0.446027
57	-0.39619	1.02087	-0.449534
57	-0.39619	1.02468	-0.453002
57	-0.39619	1.02849	-0.456428
57	-0.39619	1.0323	-0.459813
57	-0.39619	1.03611	-0.463156
57	-0.39619	1.03992	-0.466457
57	-0.39619	1.04373	-0.469713
57	-0.39619	1.04754	-0.472925
57	-0.39619	1.05135	-0.476089
57	-0.39619	1.05516	-0.479206
57	-0.39619	1.05897	-0.482272
57	-0.39619	1.06278	-0.485286
57	-0.39619	1.06659	-0.488243
57	-0.39619	1.0704	-0.491141
57	-0.39619	1.07421	-0.493974
57	-0.39619	1.07801	-0.49674
57	-0.39619	1.08182	-0.49943
57	-0.39619	1.08563	-0.502037
57	-0.39619	1.08944	-0.504556
57	-0.39619	1.09325	-0.506976
57	-0.39619	1.09706	-0.509284
57	-0.39619	1.10087	-0.511471
57	-0.39619	1.10468	-0.513521
57	-0.39619	1.10849	-0.515417
57	-0.39619	1.1123	-0.517141
57	-0.39619	1.11611	-0.518673
57	-0.39619	1.11992	-0.519994
57	-0.39619	1.12373	-0.521082
57	-0.39619	1.12754	-0.521918
57	-0.39619	1.13135	-0.522485
57	-0.39619	1.13516	-0.522769
57	-0.39619	1.13897	-0.522766
57	-0.39619	1.14278	-0.522475
57	-0.39619	1.14659	-0.521904
57	-0.39619	1.1504	-0.521061
57	-0.39619	1.15421	-0.519968
57	-0.39619	1.15801	-0.518643
57	-0.392381	0.358015	0.0798128
57	-0.392381	0.361824	0.0823631
57	-0.392381	0.365634	0.0847226
57	-0.392381	0.369443	0.0868762
57	-0.392381	0.373253	0.0888073
57	-0.392381	0.377062	0.0904979
57	-0.392381	0.380872	0.0919292
57	-0.392381	0.384682	0.0930827
57	-0.392381	0.388491	0.0939419
57	-0.392381	0.392301	0.094493
57	-0.392381	0.39611	0.094729
57	-0.392381	0.39992	0.0946486
57	-0.392381	0.403729	0.09426
57	-0.392381	0.407539	0.0935808
57	-0.392381	0.411348	0.0926344
57	-0.392381	0.415158	0.091452
57	-0.392381	0.418967	0.0900677
57	-0.392381	0.422777	0.0885166
57	-0.392381	0.426586	0.086833
57	-0.392381	0.430396	0.0850499
57	-0.392381	0.434205	0.0831969
57	-0.392381	0.438015	0.0813016
57	-0.392381	0.441824	0.0793871
57	-0.392381	0.445634	0.0774753
57	-0.392381	0.449443	0.0755847
57	-0.392381	0.453253	0.0737328
57	-0.392381	0.457062	0.0719339
57	-0.392381	0.460872	0.0702006
57	-0.392381	0.464682	0.0685451
57	-0.392381	0.468491	0.066977
57	-0.392381	0.472301	0.0655037
57	-0.392381	0.47611	0.0641339
57	-0.392381	0.47992	0.0628716
57	-0.392381	0.483729	0.0617215
57	-0.392381	0.487539	0.0606872
57	-0.392381	0.491348	0.0597705
57	-0.392381	0.495158	0.0589729
57	-0.392381	0.498967	0.0582967
57	-0.392381	0.502777	0.0577435
57	-0.392381	0.506586	0.0573156
57	-0.392381	0.510396	0.057017
57	-0.392381	0.514205	0.0568512
57	-0.392381	0.518015	0.0568239
57	-0.392381	0.521824	0.0569395
57	-0.392381	0.525634	0.0572027
57	-0.392381	0.529443	0.0576156
57	-0.392381	0.533253	0.0581761
57	-0.392381	0.537062	0.0588769
57	-0.392381	0.540872	0.0596985
57	-0.392381	0.544682	0.0606027
57	-0.392381	0.548491	0.0615183
57	-0.392381	0.552301	0.0623106
57	-0.392381	0.55611	0.0627411
57	-0.392381	0.55992	0.0624599
57	-0.392381	0.563729	0.0611711
57	-0.392381	0.567539	0.0588937
57	-0.392381	0.571348	0.0558935
57	-0.392381	0.575158	0.0524317
57	-0.392381	0.578967	0.0486772
57	-0.392381	0.582777	0.0447286
57	-0.392381	0.586586	0.0406432
57	-0.392381	0.590396	0.0364569
57	-0.392381	0.594205	0.0321935
57	-0.392381	0.598015	0.0278687
57	-0.392381	0.601824	0.0234954
57	-0.392381	0.605634	0.0190829
57	-0.392381	0.609443	0.0146386
57	-0.392381	0.613253	0.0101691
57	-0.392381	0.617062	0.00567916
57	-0.392381	0.620872	0.00117427
57	-0.392381	0.624682	-0.00334221
57	-0.392381	0.628491	-0.00786624
57	-0.392381	0.632301	-0.0123947
57	-0.392381	0.63611	-0.0169245
57	-0.392381	0.63992	-0.0214534
57	-0.392381	0.643729	-0.0259788
57	-0.392381	0.647539	-0.0304991
57	-0.392381	0.651348	-0.0350123
57	-0.392381	0.655158	-0.0395162
57	-0.392381	0.658967	-0.0440109
57	-0.392381	0.662777	-0.0484938
57	-0.392381	0.666586	-0.0529649
57	-0.392381	0.670396	-0.0574222
57	-0.392381	0.674205	-0.0618664
57	-0.392381	0.678015	-0.0662958
57	-0.392381	0.681824	-0.0707101
57	-0.392381	0.685634	-0.0751099
57	-0.392381	0.689443	-0.0794944
57	-0.392381	0.693253	-0.0838633
57	-0.392381	0.697062	-0.0882172
57	-0.392381	0.700872	-0.0925557
57	-0.392381	0.704682	-0.0968788
57	-0.392381	0.708491	-0.101187
57	-0.392381	0.712301	-0.105482
57	-0.392381	0.71611	-0.109762
57	-0.392381	0.71992	-0.114029
57	-0.392381	0.723729	-0.118284
57	-0.392381	0.727539	-0.122526
57	-0.392381	0.731348	-0.126757
57	-0.392381	0.735158	-0.130977
57	-0.392381	0.738967	-0.135186
57	-0.392381	0.742777	-0.139387
57	-0.392381	0.746586	-0.143579
57	-0.392381	0.750396	-0.147765
57	-0.392381	0.754205	-0.151943
57	-0.392381	0.758015	-0.156116
57	-0.392381	0.761824	-0.160285
57	-0.392381	0.765634	-0.16445
57	-0.392381	0.769443	-0.168613
57	-0.392381	0.773253	-0.172774
57	-0.392381	0.777062	-0.176935
57	-0.392381	0.780872	-0.181097
57	-0.392381	0.784682	-0.18526
57	-0.392381	0.788491	-0.189426
57	-0.392381	0.792301	-0.193596
57	-0.392381	0.79611	-0.19777
57	-0.392381	0.79992	-0.20195
57	-0.392381	0.803729	-0.206137
57	-0.392381	0.807539	-0.21033
57	-0.392381	0.811348	-0.214532
57	-0.392381	0.815158	-0.218743
57	-0.392381	0.818967	-0.222963
57	-0.392381	0.822777	-0.227192
57	-0.392381	0.826586	-0.231432
57	-0.392381	0.830396	-0.235683
57	-0.392381	0.834205	-0.239946
57	-0.392381	0.838015	-0.244218
57	-0.392381	0.841824	-0.248503
57	-0.392381	0.845634	-0.252798
57	-0.392381	0.849443	-0.257104
57	-0.392381	0.853253	-0.26142
57	-0.392381	0.857062	-0.265748
57	-0.392381	0.860872	-0.270085
57	-0.392381	0.864682	-0.27443
57	-0.392381	0.868491	-0.278785
57	-0.392381	0.872301	-0.283146
57	-0.392381	0.87611	-0.287513
57	-0.392381	0.87992	-0.291885
57	-0.392381	0.883729	-0.296262
57	-0.392381	0.887539	-0.300641
57	-0.392381	0.891348	-0.30502
57	-0.392381	0.895158	-0.3094
57	-0.392381	0.898967	-0.313778
57	-0.392381	0.902777	-0.318152
57	-0.392381	0.906586	-0.322519
57	-0.392381	0.910396	-0.32688
57	-0.392381	0.914205	-0.331232
57	-0.392381	0.918015	-0.335572
57	-0.392381	0.921824	-0.339901
57	-0.392381	0.925634	-0.344214
57	-0.392381	0.929443	-0.34851
57	-0.392381	0.933253	-0.352789
57	-0.392381	0.937062	-0.357047
57	-0.392381	0.940872	-0.361284
57	-0.392381	0.944682	-0.365497
57	-0.392381	0.948491	-0.369684
57	-0.392381	0.952301	-0.373845
57	-0.392381	0.95611	-0.377978
57	-0.392381	0.95992	-0.382082
57	-0.392381	0.963729	-0.386154
57	-0.392381	0.967539	-0.390194
57	-0.392381	0.971348	-0.394202
57	-0.392381	0.975158	-0.398175
57	-0.392381	0.978967	-0.402114
57	-0.392381	0.982777	-0.406016
57	-0.392381	0.986586	-0.409883
57	-0.392381	0.990396	-0.413713
57	-0.392381	0.994205	-0.417505
57	-0.392381	0.998015	-0.42126
57	-0.392381	1.00182	-0.424977
57	-0.392381	1.00563	-0.428654
57	-0.392381	1.00944	-0.432294
57	-0.392381	1.01325	-0.435894
57	-0.392381	1.01706	-0.439455
57	-0.392381	1.02087	-0.442977
57	-0.392381	1.02468	-0.446458
57	-0.392381	1.02849	-0.4499
57	-0.392381	1.0323	-0.4533
57	-0.392381	1.03611	-0.456658
57	-0.392381	1.03992	-0.459975
57	-0.392381	1.04373	-0.463248
57	-0.392381	1.04754	-0.466477
57	-0.392381	1.05135	-0.469659
57	-0.392381	1.05516	-0.472794
57	-0.392381	1.05897	-0.475878
57	-0.392381	1.06278	-0.47891
57	-0.392381	1.06659	-0.481886
57	-0.392381	1.0704	-0.484801
57	-0.392381	1.07421	-0.487654
57	-0.392381	1.07801	-0.490437
57	-0.392381	1.08182	-0.493146
57	-0.392381	1.08563	-0.495772
57	-0.392381	1.08944	-0.498309
57	-0.392381	1.09325	-0.500744
57	-0.392381	1.09706	-0.50307
57	-0.392381	1.10087	-0.505271
57	-0.392381	1.10468	-0.507334
57	-0.392381	1.10849	-0.509242
57	-0.392381	1.1123	-0.510977
57	-0.392381	1.11611	-0.512518
57	-0.392381	1.11992	-0.513847
57	-0.392381	1.12373	-0.51494
57	-0.392381	1.12754	-0.51578
57	-0.392381	1.13135	-0.516349
57	-0.392381	1.13516	-0.516635
57	-0.392381	1.13897	-0.516632
57	-0.392381	1.14278	-0.51634
57	-0.392381	1.14659	-0.515765
57	-0.392381	1.1504	-0.514921
57	-0.392381	1.15421	-0.513821
57	-0.392381	1.15801	-0.512488
57	-0.388571	0.358015	0.0715336
57	-0.388571	0.361824	0.0742401
57	-0.388571	0.365634	0.076786
57	-0.388571	0.369443	0.0791611
57	-0.388571	0.373253	0.0813535
57	-0.388571	0.377062	0.0833506
57	-0.388571	0.380872	0.0851403
57	-0.388571	0.384682	0.0867078
57	-0.388571	0.388491	0.0880395
57	-0.388571	0.392301	0.0891208
57	-0.388571	0.39611	0.0899406
57	-0.388571	0.39992	0.0904891
57	-0.388571	0.403729	0.0907598
57	-0.388571	0.407539	0.0907523
57	-0.388571	0.411348	0.0904722
57	-0.388571	0.415158	0.0899319
57	-0.388571	0.418967	0.0891504
57	-0.388571	0.422777	0.0881509
57	-0.388571	0.426586	0.0869614
57	-0.388571	0.430396	0.0856124
57	-0.388571	0.434205	0.0841331
57	-0.388571	0.438015	0.0825539
57	-0.388571	0.441824	0.080902
57	-0.388571	0.445634	0.0792041
57	-0.388571	0.449443	0.0774831
57	-0.388571	0.453253	0.0757609
57	-0.388571	0.457062	0.0740559
57	-0.388571	0.460872	0.0723851
57	-0.388571	0.464682	0.0707635
57	-0.388571	0.468491	0.0692042
57	-0.388571	0.472301	0.0677187
57	-0.388571	0.47611	0.0663167
57	-0.388571	0.47992	0.0650064
57	-0.388571	0.483729	0.0637959
57	-0.388571	0.487539	0.0626906
57	-0.388571	0.491348	0.061695
57	-0.388571	0.495158	0.0608145
57	-0.388571	0.498967	0.060052
57	-0.388571	0.502777	0.0594111
57	-0.388571	0.506586	0.0588956
57	-0.388571	0.510396	0.0585104
57	-0.388571	0.514205	0.0582578
57	-0.388571	0.518015	0.0581434
57	-0.388571	0.521824	0.0581712
57	-0.388571	0.525634	0.0583432
57	-0.388571	0.529443	0.0586614
57	-0.388571	0.533253	0.0591208
57	-0.388571	0.537062	0.0597114
57	-0.388571	0.540872	0.0604087
57	-0.388571	0.544682	0.0611634
57	-0.388571	0.548491	0.0618791
57	-0.388571	0.552301	0.0623727
57	-0.388571	0.55611	0.0623286
57	-0.388571	0.55992	0.0613855
57	-0.388571	0.563729	0.059435
57	-0.388571	0.567539	0.0567035
57	-0.388571	0.571348	0.0534758
57	-0.388571	0.575158	0.0499429
57	-0.388571	0.578967	0.0462129
57	-0.388571	0.582777	0.042347
57	-0.388571	0.586586	0.0383812
57	-0.388571	0.590396	0.0343397
57	-0.388571	0.594205	0.0302379
57	-0.388571	0.598015	0.0260885
57	-0.388571	0.601824	0.0219
57	-0.388571	0.605634	0.0176797
57	-0.388571	0.609443	0.0134334
57	-0.388571	0.613253	0.00916699
57	-0.388571	0.617062	0.00488393
57	-0.388571	0.620872	0.00058908
57	-0.388571	0.624682	-0.00371503
57	-0.388571	0.628491	-0.00802485
57	-0.388571	0.632301	-0.0123375
57	-0.388571	0.63611	-0.0166516
57	-0.388571	0.63992	-0.020964
57	-0.388571	0.643729	-0.0252732
57	-0.388571	0.647539	-0.0295773
57	-0.388571	0.651348	-0.0338757
57	-0.388571	0.655158	-0.0381662
57	-0.388571	0.658967	-0.0424486
57	-0.388571	0.662777	-0.0467212
57	-0.388571	0.666586	-0.0509841
57	-0.388571	0.670396	-0.0552368
57	-0.388571	0.674205	-0.059478
57	-0.388571	0.678015	-0.0637082
57	-0.388571	0.681824	-0.067927
57	-0.388571	0.685634	-0.0721346
57	-0.388571	0.689443	-0.0763306
57	-0.388571	0.693253	-0.0805153
57	-0.388571	0.697062	-0.084689
57	-0.388571	0.700872	-0.0888517
57	-0.388571	0.704682	-0.0930045
57	-0.388571	0.708491	-0.0971472
57	-0.388571	0.712301	-0.101281
57	-0.388571	0.71611	-0.105405
57	-0.388571	0.71992	-0.109521
57	-0.388571	0.723729	-0.11363
57	-0.388571	0.727539	-0.117731
57	-0.388571	0.731348	-0.121825
57	-0.388571	0.735158	-0.125915
57	-0.388571	0.738967	-0.13
57	-0.388571	0.742777	-0.134081
57	-0.388571	0.746586	-0.138158
57	-0.388571	0.750396	-0.142234
57	-0.388571	0.754205	-0.146308
57	-0.388571	0.758015	-0.150382
57	-0.388571	0.761824	-0.154456
57	-0.388571	0.765634	-0.158531
57	-0.388571	0.769443	-0.16261
57	-0.388571	0.773253	-0.166691
57	-0.388571	0.777062	-0.170777
57	-0.388571	0.780872	-0.174868
57	-0.388571	0.784682	-0.178964
57	-0.388571	0.788491	-0.183068
57	-0.388571	0.792301	-0.18718
57	-0.388571	0.79611	-0.1913
57	-0.388571	0.79992	-0.19543
57	-0.388571	0.803729	-0.19957
57	-0.388571	0.807539	-0.20372
57	-0.388571	0.811348	-0.207883
57	-0.388571	0.815158	-0.212057
57	-0.388571	0.818967	-0.216243
57	-0.388571	0.822777	-0.220443
57	-0.388571	0.826586	-0.224656
57	-0.388571	0.830396	-0.228883
57	-0.388571	0.834205	-0.233123
57	-0.388571	0.838015	-0.237376
57	-0.388571	0.841824	-0.241644
57	-0.388571	0.845634	-0.245924
57	-0.388571	0.849443	-0.250218
57	-0.388571	0.853253	-0.254523
57	-0.388571	0.857062	-0.258842
57	-0.388571	0.860872	-0.263172
57	-0.388571	0.864682	-0.267512
57	-0.388571	0.868491	-0.271861
57	-0.388571	0.872301	-0.27622
57	-0.388571	0.87611	-0.280586
57	-0.388571	0.87992	-0.284959
57	-0.388571	0.883729	-0.289336
57	-0.388571	0.887539	-0.293716
57	-0.388571	0.891348	-0.298099
57	-0.388571	0.895158	-0.302482
57	-0.388571	0.898967	-0.306864
57	-0.388571	0.902777	-0.311242
57	-0.388571	0.906586	-0.315616
57	-0.388571	0.910396	-0.319983
57	-0.388571	0.914205	-0.324341
57	-0.388571	0.918015	-0.328689
57	-0.388571	0.921824	-0.333024
57	-0.388571	0.925634	-0.337345
57	-0.388571	0.929443	-0.34165
57	-0.388571	0.933253	-0.345936
57	-0.388571	0.937062	-0.350204
57	-0.388571	0.940872	-0.354448
57	-0.388571	0.944682	-0.35867
57	-0.388571	0.948491	-0.362867
57	-0.388571	0.952301	-0.367037
57	-0.388571	0.95611	-0.371179
57	-0.388571	0.95992	-0.375292
57	-0.388571	0.963729	-0.379374
57	-0.388571	0.967539	-0.383424
57	-0.388571	0.971348	-0.387442
57	-0.388571	0.975158	-0.391425
57	-0.388571	0.978967	-0.395374
57	-0.388571	0.982777	-0.399288
57	-0.388571	0.986586	-0.403165
57	-0.388571	0.990396	-0.407006
57	-0.388571	0.994205	-0.41081
57	-0.388571	0.998015	-0.414576
57	-0.388571	1.00182	-0.418305
57	-0.388571	1.00563	-0.421995
57	-0.388571	1.00944	-0.425647
57	-0.388571	1.01325	-0.42926
57	-0.388571	1.01706	-0.432835
57	-0.388571	1.02087	-0.43637
57	-0.388571	1.02468	-0.439866
57	-0.388571	1.02849	-0.443322
57	-0.388571	1.0323	-0.446737
57	-0.388571	1.03611	-0.450112
57	-0.388571	1.03992	-0.453444
57	-0.388571	1.04373	-0.456733
57	-0.388571	1.04754	-0.459979
57	-0.388571	1.05135	-0.463178
57	-0.388571	1.05516	-0.46633
57	-0.388571	1.05897	-0.469432
57	-0.388571	1.06278	-0.472482
57	-0.388571	1.06659	-0.475476
57	-0.388571	1.0704	-0.47841
57	-0.388571	1.07421	-0.481281
57	-0.388571	1.07801	-0.484081
57	-0.388571	1.08182	-0.486808
57	-0.388571	1.08563	-0.489452
57	-0.388571	1.08944	-0.492004
57	-0.388571	1.09325	-0.494455
57	-0.388571	1.09706	-0.496795
57	-0.388571	1.10087	-0.499011
57	-0.388571	1.10468	-0.501085
57	-0.388571	1.10849	-0.503004
57	-0.388571	1.1123	-0.504748
57	-0.388571	1.11611	-0.506297
57	-0.388571	1.11992	-0.507632
57	-0.388571	1.12373	-0.50873
57	-0.388571	1.12754	-0.509572
57	-0.388571	1.13135	-0.510143
57	-0.388571	1.13516	-0.51043
57	-0.388571	1.13897	-0.510427
57	-0.388571	1.14278	-0.510134
57	-0.388571	1.14659	-0.509558
57	-0.388571	1.1504	-0.508709
57	-0.388571	1.15421	-0.507607
57	-0.388571	1.15801	-0.506267
57	-0.384762	0.358015	0.0631311
57	-0.384762	0.361824	0.0659523
57	-0.384762	0.365634	0.068633
57	-0.384762	0.369443	0.0711659
57	-0.384762	0.373253	0.0735433
57	-0.384762	0.377062	0.0757564
57	-0.384762	0.380872	0.0777965
57	-0.384762	0.384682	0.0796536
57	-0.384762	0.388491	0.0813179
57	-0.384762	0.392301	0.0827792
57	-0.384762	0.39611	0.0840275
57	-0.384762	0.39992	0.0850524
57	-0.384762	0.403729	0.0858458
57	-0.384762	0.407539	0.0864004
57	-0.384762	0.411348	0.0867125
57	-0.384762	0.415158	0.0867815
57	-0.384762	0.418967	0.0866116
57	-0.384762	0.422777	0.0862118
57	-0.384762	0.426586	0.0855956
57	-0.384762	0.430396	0.0847818
57	-0.384762	0.434205	0.0837924
57	-0.384762	0.438015	0.0826515
57	-0.384762	0.441824	0.0813852
57	-0.384762	0.445634	0.0800197
57	-0.384762	0.449443	0.0785806
57	-0.384762	0.453253	0.077092
57	-0.384762	0.457062	0.0755762
57	-0.384762	0.460872	0.0740548
57	-0.384762	0.464682	0.0725461
57	-0.384762	0.468491	0.071067
57	-0.384762	0.472301	0.0696325
57	-0.384762	0.47611	0.0682558
57	-0.384762	0.47992	0.0669497
57	-0.384762	0.483729	0.0657231
57	-0.384762	0.487539	0.0645856
57	-0.384762	0.491348	0.0635453
57	-0.384762	0.495158	0.0626084
57	-0.384762	0.498967	0.0617818
57	-0.384762	0.502777	0.0610701
57	-0.384762	0.506586	0.060479
57	-0.384762	0.510396	0.0600138
57	-0.384762	0.514205	0.0596785
57	-0.384762	0.518015	0.0594784
57	-0.384762	0.521824	0.0594168
57	-0.384762	0.525634	0.0594958
57	-0.384762	0.529443	0.059715
57	-0.384762	0.533253	0.0600685
57	-0.384762	0.537062	0.0605421
57	-0.384762	0.540872	0.0611019
57	-0.384762	0.544682	0.0616804
57	-0.384762	0.548491	0.0621374
57	-0.384762	0.552301	0.0622052
57	-0.384762	0.55611	0.0615002
57	-0.384762	0.55992	0.0598045
57	-0.384762	0.563729	0.057293
57	-0.384762	0.567539	0.0542684
57	-0.384762	0.571348	0.0509379
57	-0.384762	0.575158	0.0474154
57	-0.384762	0.578967	0.0437626
57	-0.384762	0.582777	0.0400155
57	-0.384762	0.586586	0.0361964
57	-0.384762	0.590396	0.0323196
57	-0.384762	0.594205	0.028397
57	-0.384762	0.598015	0.0244367
57	-0.384762	0.601824	0.020445
57	-0.384762	0.605634	0.0164281
57	-0.384762	0.609443	0.0123908
57	-0.384762	0.613253	0.00833668
57	-0.384762	0.617062	0.00426917
57	-0.384762	0.620872	0.00019271
57	-0.384762	0.624682	-0.00389128
57	-0.384762	0.628491	-0.00798001
57	-0.384762	0.632301	-0.012071
57	-0.384762	0.63611	-0.0161625
57	-0.384762	0.63992	-0.0202529
57	-0.384762	0.643729	-0.0243411
57	-0.384762	0.647539	-0.0284249
57	-0.384762	0.651348	-0.0325043
57	-0.384762	0.655158	-0.0365782
57	-0.384762	0.658967	-0.0406456
57	-0.384762	0.662777	-0.0447063
57	-0.384762	0.666586	-0.0487603
57	-0.384762	0.670396	-0.0528067
57	-0.384762	0.674205	-0.0568453
57	-0.384762	0.678015	-0.0608768
57	-0.384762	0.681824	-0.0649007
57	-0.384762	0.685634	-0.0689171
57	-0.384762	0.689443	-0.0729269
57	-0.384762	0.693253	-0.0769295
57	-0.384762	0.697062	-0.0809263
57	-0.384762	0.700872	-0.0849172
57	-0.384762	0.704682	-0.0889029
57	-0.384762	0.708491	-0.0928831
57	-0.384762	0.712301	-0.0968592
57	-0.384762	0.71611	-0.100832
57	-0.384762	0.71992	-0.104801
57	-0.384762	0.723729	-0.108769
57	-0.384762	0.727539	-0.112734
57	-0.384762	0.731348	-0.116698
57	-0.384762	0.735158	-0.120663
57	-0.384762	0.738967	-0.124627
57	-0.384762	0.742777	-0.128594
57	-0.384762	0.746586	-0.132562
57	-0.384762	0.750396	-0.136533
57	-0.384762	0.754205	-0.140508
57	-0.384762	0.758015	-0.144488
57	-0.384762	0.761824	-0.148473
57	-0.384762	0.765634	-0.152464
57	-0.384762	0.769443	-0.156463
57	-0.384762	0.773253	-0.160469
57	-0.384762	0.777062	-0.164484
57	-0.384762	0.780872	-0.168509
57	-0.384762	0.784682	-0.172544
57	-0.384762	0.788491	-0.17659
57	-0.384762	0.792301	-0.180648
57	-0.384762	0.79611	-0.184718
57	-0.384762	0.79992	-0.188801
57	-0.384762	0.803729	-0.192898
57	-0.384762	0.807539	-0.197009
57	-0.384762	0.811348	-0.201136
57	-0.384762	0.815158	-0.205277
57	-0.384762	0.818967	-0.209434
57	-0.384762	0.822777	-0.213607
57	-0.384762	0.826586	-0.217796
57	-0.384762	0.830396	-0.222001
57	-0.384762	0.834205	-0.226222
57	-0.384762	0.838015	-0.230458
57	-0.384762	0.841824	-0.234711
57	-0.384762	0.845634	-0.238979
57	-0.384762	0.849443	-0.243261
57	-0.384762	0.853253	-0.247559
57	-0.384762	0.857062	-0.25187
57	-0.384762	0.860872	-0.256194
57	-0.384762	0.864682	-0.26053
57	-0.384762	0.868491	-0.264877
57	-0.384762	0.872301	-0.269234
57	-0.384762	0.87611	-0.2736
57	-0.384762	0.87992	-0.277973
57	-0.384762	0.883729	-0.282352
57	-0.384762	0.887539	-0.286736
57	-0.384762	0.891348	-0.291123
57	-0.384762	0.895158	-0.295509
57	-0.384762	0.898967	-0.299896
57	-0.384762	0.902777	-0.30428
57	-0.384762	0.906586	-0.308661
57	-0.384762	0.910396	-0.313034
57	-0.384762	0.914205	-0.317399
57	-0.384762	0.918015	-0.321754
57	-0.384762	0.921824	-0.326097
57	-0.384762	0.925634	-0.330426
57	-0.384762	0.929443	-0.334739
57	-0.384762	0.933253	-0.339034
57	-0.384762	0.937062	-0.34331
57	-0.384762	0.940872	-0.347564
57	-0.384762	0.944682	-0.351795
57	-0.384762	0.948491	-0.356001
57	-0.384762	0.952301	-0.36018
57	-0.384762	0.95611	-0.364332
57	-0.384762	0.95992	-0.368454
57	-0.384762	0.963729	-0.372546
57	-0.384762	0.967539	-0.376606
57	-0.384762	0.971348	-0.380633
57	-0.384762	0.975158	-0.384627
57	-0.384762	0.978967	-0.388586
57	-0.384762	0.982777	-0.39251
57	-0.384762	0.986586	-0.396399
57	-0.384762	0.990396	-0.400251
57	-0.384762	0.994205	-0.404066
57	-0.384762	0.998015	-0.407845
57	-0.384762	1.00182	-0.411584
57	-0.384762	1.00563	-0.415287
57	-0.384762	1.00944	-0.418952
57	-0.384762	1.01325	-0.422579
57	-0.384762	1.01706	-0.426167
57	-0.384762	1.02087	-0.429716
57	-0.384762	1.02468	-0.433225
57	-0.384762	1.02849	-0.436696
57	-0.384762	1.0323	-0.440127
57	-0.384762	1.03611	-0.443517
57	-0.384762	1.03992	-0.446865
57	-0.384762	1.04373	-0.450171
57	-0.384762	1.04754	-0.453433
57	-0.384762	1.05135	-0.456649
57	-0.384762	1.05516	-0.459818
57	-0.384762	1.05897	-0.462938
57	-0.384762	1.06278	-0.466005
57	-0.384762	1.06659	-0.469016
57	-0.384762	1.0704	-0.471968
57	-0.384762	1.07421	-0.474857
57	-0.384762	1.07801	-0.477675
57	-0.384762	1.08182	-0.480417
57	-0.384762	1.08563	-0.483077
57	-0.384762	1.08944	-0.485645
57	-0.384762	1.09325	-0.488111
57	-0.384762	1.09706	-0.490464
57	-0.384762	1.10087	-0.492691
57	-0.384762	1.10468	-0.494777
57	-0.384762	1.10849	-0.496705
57	-0.384762	1.1123	-0.498457
57	-0.384762	1.11611	-0.500012
57	-0.384762	1.11992	-0.501351
57	-0.384762	1.12373	-0.502452
57	-0.384762	1.12754	-0.503297
57	-0.384762	1.13135	-0.50387
57	-0.384762	1.13516	-0.504158
57	-0.384762	1.13897	-0.504154
57	-0.384762	1.14278	-0.50386
57	-0.384762	1.14659	-0.503282
57	-0.384762	1.1504	-0.502432
57	-0.384762	1.15421	-0.501325
57	-0.384762	1.15801	-0.499982
57	-0.380952	0.358015	0.0546602
57	-0.380952	0.361824	0.0575684
57	-0.380952	0.365634	0.0603506
57	-0.380952	0.369443	0.0630012
57	-0.380952	0.373253	0.0655148
57	-0.380952	0.377062	0.0678851
57	-0.380952	0.380872	0.0701058
57	-0.380952	0.384682	0.0721706
57	-0.380952	0.388491	0.0740724
57	-0.380952	0.392301	0.0758042
57	-0.380952	0.39611	0.0773586
57	-0.380952	0.39992	0.0787284
57	-0.380952	0.403729	0.0799065
57	-0.380952	0.407539	0.0808862
57	-0.380952	0.411348	0.0816618
57	-0.380952	0.415158	0.0822294
57	-0.380952	0.418967	0.0825861
57	-0.380952	0.422777	0.0827319
57	-0.380952	0.426586	0.0826708
57	-0.380952	0.430396	0.0824085
57	-0.380952	0.434205	0.081956
57	-0.380952	0.438015	0.0813268
57	-0.380952	0.441824	0.0805383
57	-0.380952	0.445634	0.0796102
57	-0.380952	0.449443	0.0785634
57	-0.380952	0.453253	0.0774206
57	-0.380952	0.457062	0.0762041
57	-0.380952	0.460872	0.0749364
57	-0.380952	0.464682	0.0736383
57	-0.380952	0.468491	0.0723301
57	-0.380952	0.472301	0.0710295
57	-0.380952	0.47611	0.0697538
57	-0.380952	0.47992	0.0685182
57	-0.380952	0.483729	0.0673359
57	-0.380952	0.487539	0.06622
57	-0.380952	0.491348	0.0651807
57	-0.380952	0.495158	0.0642278
57	-0.380952	0.498967	0.0633704
57	-0.380952	0.502777	0.0626158
57	-0.380952	0.506586	0.061972
57	-0.380952	0.510396	0.0614447
57	-0.380952	0.514205	0.0610401
57	-0.380952	0.518015	0.0607636
57	-0.380952	0.521824	0.0606194
57	-0.380952	0.525634	0.0606087
57	-0.380952	0.529443	0.0607305
57	-0.380952	0.533253	0.0609761
57	-0.380952	0.537062	0.061324
57	-0.380952	0.540872	0.0617253
57	-0.380952	0.544682	0.062074
57	-0.380952	0.548491	0.0621445
57	-0.380952	0.552301	0.0615587
57	-0.380952	0.55611	0.0600222
57	-0.380952	0.55992	0.0576664
57	-0.380952	0.563729	0.0548059
57	-0.380952	0.567539	0.0516566
57	-0.380952	0.571348	0.0483304
57	-0.380952	0.575158	0.0448857
57	-0.380952	0.578967	0.0413546
57	-0.380952	0.582777	0.0377575
57	-0.380952	0.586586	0.0341079
57	-0.380952	0.590396	0.0304153
57	-0.380952	0.594205	0.0266871
57	-0.380952	0.598015	0.0229293
57	-0.380952	0.601824	0.0191474
57	-0.380952	0.605634	0.0153445
57	-0.380952	0.609443	0.0115255
57	-0.380952	0.613253	0.00769315
57	-0.380952	0.617062	0.00384997
57	-0.380952	0.620872	-9.6e-07
57	-0.380952	0.624682	-0.00385778
57	-0.380952	0.628491	-0.00771866
57	-0.380952	0.632301	-0.0115815
57	-0.380952	0.63611	-0.0154456
57	-0.380952	0.63992	-0.0193096
57	-0.380952	0.643729	-0.0231718
57	-0.380952	0.647539	-0.0270326
57	-0.380952	0.651348	-0.0308905
57	-0.380952	0.655158	-0.0347452
57	-0.380952	0.658967	-0.0385969
57	-0.380952	0.662777	-0.0424449
57	-0.380952	0.666586	-0.0462885
57	-0.380952	0.670396	-0.0501294
57	-0.380952	0.674205	-0.0539665
57	-0.380952	0.678015	-0.0578002
57	-0.380952	0.681824	-0.0616307
57	-0.380952	0.685634	-0.0654589
57	-0.380952	0.689443	-0.069285
57	-0.380952	0.693253	-0.073109
57	-0.380952	0.697062	-0.0769324
57	-0.380952	0.700872	-0.0807545
57	-0.380952	0.704682	-0.0845766
57	-0.380952	0.708491	-0.0883994
57	-0.380952	0.712301	-0.092223
57	-0.380952	0.71611	-0.0960489
57	-0.380952	0.71992	-0.0998765
57	-0.380952	0.723729	-0.103708
57	-0.380952	0.727539	-0.107542
57	-0.380952	0.731348	-0.111382
57	-0.380952	0.735158	-0.115226
57	-0.380952	0.738967	-0.119077
57	-0.380952	0.742777	-0.122934
57	-0.380952	0.746586	-0.126798
57	-0.380952	0.750396	-0.13067
57	-0.380952	0.754205	-0.134551
57	-0.380952	0.758015	-0.138442
57	-0.380952	0.761824	-0.142343
57	-0.380952	0.765634	-0.146255
57	-0.380952	0.769443	-0.150178
57	-0.380952	0.773253	-0.154114
57	-0.380952	0.777062	-0.158063
57	-0.380952	0.780872	-0.162026
57	-0.380952	0.784682	-0.166004
57	-0.380952	0.788491	-0.169996
57	-0.380952	0.792301	-0.174004
57	-0.380952	0.79611	-0.178028
57	-0.380952	0.79992	-0.182069
57	-0.380952	0.803729	-0.186127
57	-0.380952	0.807539	-0.190202
57	-0.380952	0.811348	-0.194296
57	-0.380952	0.815158	-0.198408
57	-0.380952	0.818967	-0.202537
57	-0.380952	0.822777	-0.206686
57	-0.380952	0.826586	-0.210853
57	-0.380952	0.830396	-0.215039
57	-0.380952	0.834205	-0.219243
57	-0.380952	0.838015	-0.223465
57	-0.380952	0.841824	-0.227705
57	-0.380952	0.845634	-0.231963
57	-0.380952	0.849443	-0.236237
57	-0.380952	0.853253	-0.240527
57	-0.380952	0.857062	-0.244832
57	-0.380952	0.860872	-0.249153
57	-0.380952	0.864682	-0.253487
57	-0.380952	0.868491	-0.257832
57	-0.380952	0.872301	-0.262189
57	-0.380952	0.87611	-0.266556
57	-0.380952	0.87992	-0.270931
57	-0.380952	0.883729	-0.275313
57	-0.380952	0.887539	-0.2797
57	-0.380952	0.891348	-0.284091
57	-0.380952	0.895158	-0.288483
57	-0.380952	0.898967	-0.292876
57	-0.380952	0.902777	-0.297266
57	-0.380952	0.906586	-0.301652
57	-0.380952	0.910396	-0.306033
57	-0.380952	0.914205	-0.310406
57	-0.380952	0.918015	-0.314769
57	-0.380952	0.921824	-0.31912
57	-0.380952	0.925634	-0.323457
57	-0.380952	0.929443	-0.327779
57	-0.380952	0.933253	-0.332083
57	-0.380952	0.937062	-0.336367
57	-0.380952	0.940872	-0.34063
57	-0.380952	0.944682	-0.34487
57	-0.380952	0.948491	-0.349086
57	-0.380952	0.952301	-0.353274
57	-0.380952	0.95611	-0.357435
57	-0.380952	0.95992	-0.361567
57	-0.380952	0.963729	-0.365669
57	-0.380952	0.967539	-0.369739
57	-0.380952	0.971348	-0.373777
57	-0.380952	0.975158	-0.377781
57	-0.380952	0.978967	-0.381751
57	-0.380952	0.982777	-0.385686
57	-0.380952	0.986586	-0.389585
57	-0.380952	0.990396	-0.393448
57	-0.380952	0.994205	-0.397275
57	-0.380952	0.998015	-0.401065
57	-0.380952	1.00182	-0.404817
57	-0.380952	1.00563	-0.408533
57	-0.380952	1.00944	-0.41221
57	-0.380952	1.01325	-0.41585
57	-0.380952	1.01706	-0.419452
57	-0.380952	1.02087	-0.423015
57	-0.380952	1.02468	-0.426539
57	-0.380952	1.02849	-0.430025
57	-0.380952	1.0323	-0.43347
57	-0.380952	1.03611	-0.436875
57	-0.380952	1.03992	-0.44024
57	-0.380952	1.04373	-0.443562
57	-0.380952	1.04754	-0.446841
57	-0.380952	1.05135	-0.450074
57	-0.380952	1.05516	-0.453259
57	-0.380952	1.05897	-0.456396
57	-0.380952	1.06278	-0.45948
57	-0.380952	1.06659	-0.462509
57	-0.380952	1.0704	-0.465478
57	-0.380952	1.07421	-0.468383
57	-0.380952	1.07801	-0.471218
57	-0.380952	1.08182	-0.473976
57	-0.380952	1.08563	-0.476651
57	-0.380952	1.08944	-0.479234
57	-0.380952	1.09325	-0.481713
57	-0.380952	1.09706	-0.484079
57	-0.380952	1.10087	-0.486317
57	-0.380952	1.10468	-0.488412
57	-0.380952	1.10849	-0.490349
57	-0.380952	1.1123	-0.492107
57	-0.380952	1.11611	-0.493668
57	-0.380952	1.11992	-0.49501
57	-0.380952	1.12373	-0.496113
57	-0.380952	1.12754	-0.49696
57	-0.380952	1.13135	-0.497533
57	-0.380952	1.13516	-0.497821
57	-0.380952	1.13897	-0.497818
57	-0.380952	1.14278	-0.497524
57	-0.380952	1.14659	-0.496945
57	-0.380952	1.1504	-0.496093
57	-0.380952	1.15421	-0.494984
57	-0.380952	1.15801	-0.493636
57	-0.377143	0.358015	0.0461573
57	-0.377143	0.361824	0.0491341
57	-0.377143	0.365634	0.0519954
57	-0.377143	0.369443	0.0547373
57	-0.377143	0.373253	0.0573552
57	-0.377143	0.377062	0.0598444
57	-0.377143	0.380872	0.0622006
57	-0.377143	0.384682	0.0644195
57	-0.377143	0.388491	0.066496
57	-0.377143	0.392301	0.0684253
57	-0.377143	0.39611	0.0702018
57	-0.377143	0.39992	0.0718215
57	-0.377143	0.403729	0.0732787
57	-0.377143	0.407539	0.074569
57	-0.377143	0.411348	0.0756877
57	-0.377143	0.415158	0.0766306
57	-0.377143	0.418967	0.0773949
57	-0.377143	0.422777	0.0779776
57	-0.377143	0.426586	0.0783785
57	-0.377143	0.430396	0.0785986
57	-0.377143	0.434205	0.0786403
57	-0.377143	0.438015	0.0785094
57	-0.377143	0.441824	0.0782133
57	-0.377143	0.445634	0.0777634
57	-0.377143	0.449443	0.0771725
57	-0.377143	0.453253	0.0764561
57	-0.377143	0.457062	0.0756307
57	-0.377143	0.460872	0.0747158
57	-0.377143	0.464682	0.0737298
57	-0.377143	0.468491	0.072693
57	-0.377143	0.472301	0.0716236
57	-0.377143	0.47611	0.0705405
57	-0.377143	0.47992	0.0694612
57	-0.377143	0.483729	0.0684019
57	-0.377143	0.487539	0.0673783
57	-0.377143	0.491348	0.0664039
57	-0.377143	0.495158	0.0654913
57	-0.377143	0.498967	0.0646525
57	-0.377143	0.502777	0.0638976
57	-0.377143	0.506586	0.0632363
57	-0.377143	0.510396	0.0626773
57	-0.377143	0.514205	0.0622277
57	-0.377143	0.518015	0.0618944
57	-0.377143	0.521824	0.0616818
57	-0.377143	0.525634	0.0615912
57	-0.377143	0.529443	0.0616197
57	-0.377143	0.533253	0.0617522
57	-0.377143	0.537062	0.0619544
57	-0.377143	0.540872	0.0621415
57	-0.377143	0.544682	0.062122
57	-0.377143	0.548491	0.0615332
57	-0.377143	0.552301	0.0600501
57	-0.377143	0.55611	0.0577871
57	-0.377143	0.55992	0.0550607
57	-0.377143	0.563729	0.0520786
57	-0.377143	0.567539	0.0489429
57	-0.377143	0.571348	0.0457038
57	-0.377143	0.575158	0.0423892
57	-0.377143	0.578967	0.0390164
57	-0.377143	0.582777	0.0355963
57	-0.377143	0.586586	0.0321373
57	-0.377143	0.590396	0.0286454
57	-0.377143	0.594205	0.0251261
57	-0.377143	0.598015	0.0215838
57	-0.377143	0.601824	0.0180223
57	-0.377143	0.605634	0.0144446
57	-0.377143	0.609443	0.0108536
57	-0.377143	0.613253	0.00725121
57	-0.377143	0.617062	0.00364029
57	-0.377143	0.620872	2.22e-05
57	-0.377143	0.624682	-0.00360088
57	-0.377143	0.628491	-0.00722854
57	-0.377143	0.632301	-0.0108586
57	-0.377143	0.63611	-0.0144907
57	-0.377143	0.63992	-0.0181241
57	-0.377143	0.643729	-0.0217586
57	-0.377143	0.647539	-0.025393
57	-0.377143	0.651348	-0.029028
57	-0.377143	0.655158	-0.0326626
57	-0.377143	0.658967	-0.0362972
57	-0.377143	0.662777	-0.0399322
57	-0.377143	0.666586	-0.0435673
57	-0.377143	0.670396	-0.0472035
57	-0.377143	0.674205	-0.0508403
57	-0.377143	0.678015	-0.0544788
57	-0.377143	0.681824	-0.058119
57	-0.377143	0.685634	-0.0617623
57	-0.377143	0.689443	-0.0654076
57	-0.377143	0.693253	-0.069057
57	-0.377143	0.697062	-0.0727102
57	-0.377143	0.700872	-0.0763685
57	-0.377143	0.704682	-0.0800324
57	-0.377143	0.708491	-0.0837019
57	-0.377143	0.712301	-0.0873782
57	-0.377143	0.71611	-0.0910616
57	-0.377143	0.71992	-0.0947532
57	-0.377143	0.723729	-0.0984536
57	-0.377143	0.727539	-0.102163
57	-0.377143	0.731348	-0.105882
57	-0.377143	0.735158	-0.109612
57	-0.377143	0.738967	-0.113353
57	-0.377143	0.742777	-0.117106
57	-0.377143	0.746586	-0.120871
57	-0.377143	0.750396	-0.12465
57	-0.377143	0.754205	-0.128442
57	-0.377143	0.758015	-0.132249
57	-0.377143	0.761824	-0.13607
57	-0.377143	0.765634	-0.139908
57	-0.377143	0.769443	-0.143761
57	-0.377143	0.773253	-0.147632
57	-0.377143	0.777062	-0.151519
57	-0.377143	0.780872	-0.155424
57	-0.377143	0.784682	-0.159348
57	-0.377143	0.788491	-0.16329
57	-0.377143	0.792301	-0.167252
57	-0.377143	0.79611	-0.171234
57	-0.377143	0.79992	-0.175236
57	-0.377143	0.803729	-0.179258
57	-0.377143	0.807539	-0.183301
57	-0.377143	0.811348	-0.187365
57	-0.377143	0.815158	-0.19145
57	-0.377143	0.818967	-0.195556
57	-0.377143	0.822777	-0.199683
57	-0.377143	0.826586	-0.203831
57	-0.377143	0.830396	-0.208
57	-0.377143	0.834205	-0.212189
57	-0.377143	0.838015	-0.216399
57	-0.377143	0.841824	-0.220629
57	-0.377143	0.845634	-0.224878
57	-0.377143	0.849443	-0.229144
57	-0.377143	0.853253	-0.23343
57	-0.377143	0.857062	-0.237731
57	-0.377143	0.860872	-0.242049
57	-0.377143	0.864682	-0.246381
57	-0.377143	0.868491	-0.250727
57	-0.377143	0.872301	-0.255085
57	-0.377143	0.87611	-0.259454
57	-0.377143	0.87992	-0.263832
57	-0.377143	0.883729	-0.268218
57	-0.377143	0.887539	-0.272609
57	-0.377143	0.891348	-0.277005
57	-0.377143	0.895158	-0.281403
57	-0.377143	0.898967	-0.285802
57	-0.377143	0.902777	-0.2902
57	-0.377143	0.906586	-0.294593
57	-0.377143	0.910396	-0.298981
57	-0.377143	0.914205	-0.303362
57	-0.377143	0.918015	-0.307733
57	-0.377143	0.921824	-0.312093
57	-0.377143	0.925634	-0.316439
57	-0.377143	0.929443	-0.320769
57	-0.377143	0.933253	-0.325082
57	-0.377143	0.937062	-0.329375
57	-0.377143	0.940872	-0.333648
57	-0.377143	0.944682	-0.337897
57	-0.377143	0.948491	-0.342122
57	-0.377143	0.952301	-0.34632
57	-0.377143	0.95611	-0.350491
57	-0.377143	0.95992	-0.354633
57	-0.377143	0.963729	-0.358745
57	-0.377143	0.967539	-0.362825
57	-0.377143	0.971348	-0.366873
57	-0.377143	0.975158	-0.370888
57	-0.377143	0.978967	-0.374868
57	-0.377143	0.982777	-0.378814
57	-0.377143	0.986586	-0.382725
57	-0.377143	0.990396	-0.386599
57	-0.377143	0.994205	-0.390438
57	-0.377143	0.998015	-0.39424
57	-0.377143	1.00182	-0.398005
57	-0.377143	1.00563	-0.401733
57	-0.377143	1.00944	-0.405423
57	-0.377143	1.01325	-0.409076
57	-0.377143	1.01706	-0.412692
57	-0.377143	1.02087	-0.416269
57	-0.377143	1.02468	-0.419808
57	-0.377143	1.02849	-0.423308
57	-0.377143	1.0323	-0.426769
57	-0.377143	1.03611	-0.43019
57	-0.377143	1.03992	-0.43357
57	-0.377143	1.04373	-0.436908
57	-0.377143	1.04754	-0.440203
57	-0.377143	1.05135	-0.443453
57	-0.377143	1.05516	-0.446656
57	-0.377143	1.05897	-0.449809
57	-0.377143	1.06278	-0.452911
57	-0.377143	1.06659	-0.455956
57	-0.377143	1.0704	-0.458941
57	-0.377143	1.07421	-0.461863
57	-0.377143	1.07801	-0.464713
57	-0.377143	1.08182	-0.467486
57	-0.377143	1.08563	-0.470176
57	-0.377143	1.08944	-0.472772
57	-0.377143	1.09325	-0.475264
57	-0.377143	1.09706	-0.477641
57	-0.377143	1.10087	-0.479889
57	-0.377143	1.10468	-0.481994
57	-0.377143	1.10849	-0.483937
57	-0.377143	1.1123	-0.4857
57	-0.377143	1.11611	-0.487265
57	-0.377143	1.11992	-0.488611
57	-0.377143	1.12373	-0.489716
57	-0.377143	1.12754	-0.490563
57	-0.377143	1.13135	-0.491137
57	-0.377143	1.13516	-0.491425
57	-0.377143	1.13897	-0.491422
57	-0.377143	1.14278	-0.491127
57	-0.377143	1.14659	-0.490548
57	-0.377143	1.1504	-0.489695
57	-0.377143	1.15421	-0.488585
57	-0.377143	1.15801	-0.487234
57	-0.373333	0.358015	0.0376474
57	-0.373333	0.361824	0.0406801
57	-0.373333	0.365634	0.0436053
57	-0.373333	0.369443	0.0464203
57	-0.373333	0.373253	0.0491207
57	-0.373333	0.377062	0.0517039
57	-0.373333	0.380872	0.0541659
57	-0.373333	0.384682	0.0565039
57	-0.373333	0.388491	0.0587139
57	-0.373333	0.392301	0.0607927
57	-0.373333	0.39611	0.0627362
57	-0.373333	0.39992	0.0645416
57	-0.373333	0.403729	0.0662056
57	-0.373333	0.407539	0.0677243
57	-0.373333	0.411348	0.0690953
57	-0.373333	0.415158	0.0703152
57	-0.373333	0.418967	0.0713821
57	-0.373333	0.422777	0.072294
57	-0.373333	0.426586	0.0730489
57	-0.373333	0.430396	0.073647
57	-0.373333	0.434205	0.0740883
57	-0.373333	0.438015	0.0743753
57	-0.373333	0.441824	0.0745104
57	-0.373333	0.445634	0.0744992
57	-0.373333	0.449443	0.0743475
57	-0.373333	0.453253	0.0740646
57	-0.373333	0.457062	0.0736602
57	-0.373333	0.460872	0.0731466
57	-0.373333	0.464682	0.0725378
57	-0.373333	0.468491	0.0718481
57	-0.373333	0.472301	0.0710937
57	-0.373333	0.47611	0.0702915
57	-0.373333	0.47992	0.0694573
57	-0.373333	0.483729	0.068608
57	-0.373333	0.487539	0.0677602
57	-0.373333	0.491348	0.0669285
57	-0.373333	0.495158	0.0661283
57	-0.373333	0.498967	0.0653729
57	-0.373333	0.502777	0.0646754
57	-0.373333	0.506586	0.0640471
57	-0.373333	0.510396	0.063499
57	-0.373333	0.514205	0.0630395
57	-0.373333	0.518015	0.0626766
57	-0.373333	0.521824	0.0624139
57	-0.373333	0.525634	0.062252
57	-0.373333	0.529443	0.0621802
57	-0.373333	0.533253	0.0621697
57	-0.373333	0.537062	0.0621483
57	-0.373333	0.540872	0.0619449
57	-0.373333	0.544682	0.0612342
57	-0.373333	0.548491	0.0597311
57	-0.373333	0.552301	0.0575473
57	-0.373333	0.55611	0.0549639
57	-0.373333	0.55992	0.0521603
57	-0.373333	0.563729	0.0492238
57	-0.373333	0.567539	0.0461976
57	-0.373333	0.571348	0.0431055
57	-0.373333	0.575158	0.0399616
57	-0.373333	0.578967	0.0367757
57	-0.373333	0.582777	0.0335549
57	-0.373333	0.586586	0.0303047
57	-0.373333	0.590396	0.0270293
57	-0.373333	0.594205	0.0237324
57	-0.373333	0.598015	0.0204177
57	-0.373333	0.601824	0.0170873
57	-0.373333	0.605634	0.0137439
57	-0.373333	0.609443	0.0103894
57	-0.373333	0.613253	0.00702555
57	-0.373333	0.617062	0.00365344
57	-0.373333	0.620872	0.00027513
57	-0.373333	0.624682	-0.00310903
57	-0.373333	0.628491	-0.00649821
57	-0.373333	0.632301	-0.00989111
57	-0.373333	0.63611	-0.0132881
57	-0.373333	0.63992	-0.0166888
57	-0.373333	0.643729	-0.0200924
57	-0.373333	0.647539	-0.0235
57	-0.373333	0.651348	-0.0269108
57	-0.373333	0.655158	-0.0303254
57	-0.373333	0.658967	-0.0337438
57	-0.373333	0.662777	-0.0371674
57	-0.373333	0.666586	-0.0405952
57	-0.373333	0.670396	-0.0440292
57	-0.373333	0.674205	-0.0474687
57	-0.373333	0.678015	-0.0509148
57	-0.373333	0.681824	-0.0543685
57	-0.373333	0.685634	-0.0578297
57	-0.373333	0.689443	-0.0612994
57	-0.373333	0.693253	-0.0647779
57	-0.373333	0.697062	-0.0682666
57	-0.373333	0.700872	-0.0717657
57	-0.373333	0.704682	-0.0752757
57	-0.373333	0.708491	-0.0787974
57	-0.373333	0.712301	-0.0823312
57	-0.373333	0.71611	-0.0858781
57	-0.373333	0.71992	-0.0894384
57	-0.373333	0.723729	-0.0930132
57	-0.373333	0.727539	-0.0966026
57	-0.373333	0.731348	-0.100207
57	-0.373333	0.735158	-0.103828
57	-0.373333	0.738967	-0.107465
57	-0.373333	0.742777	-0.111119
57	-0.373333	0.746586	-0.11479
57	-0.373333	0.750396	-0.11848
57	-0.373333	0.754205	-0.122188
57	-0.373333	0.758015	-0.125915
57	-0.373333	0.761824	-0.129663
57	-0.373333	0.765634	-0.133429
57	-0.373333	0.769443	-0.137217
57	-0.373333	0.773253	-0.141025
57	-0.373333	0.777062	-0.144855
57	-0.373333	0.780872	-0.148707
57	-0.373333	0.784682	-0.152581
57	-0.373333	0.788491	-0.156478
57	-0.373333	0.792301	-0.160397
57	-0.373333	0.79611	-0.16434
57	-0.373333	0.79992	-0.168306
57	-0.373333	0.803729	-0.172295
57	-0.373333	0.807539	-0.176308
57	-0.373333	0.811348	-0.180345
57	-0.373333	0.815158	-0.184406
57	-0.373333	0.818967	-0.188491
57	-0.373333	0.822777	-0.192599
57	-0.373333	0.826586	-0.19673
57	-0.373333	0.830396	-0.200885
57	-0.373333	0.834205	-0.205062
57	-0.373333	0.838015	-0.209261
57	-0.373333	0.841824	-0.213482
57	-0.373333	0.845634	-0.217724
57	-0.373333	0.849443	-0.221985
57	-0.373333	0.853253	-0.226267
57	-0.373333	0.857062	-0.230566
57	-0.373333	0.860872	-0.234882
57	-0.373333	0.864682	-0.239215
57	-0.373333	0.868491	-0.243562
57	-0.373333	0.872301	-0.247922
57	-0.373333	0.87611	-0.252294
57	-0.373333	0.87992	-0.256676
57	-0.373333	0.883729	-0.261066
57	-0.373333	0.887539	-0.265463
57	-0.373333	0.891348	-0.269865
57	-0.373333	0.895158	-0.27427
57	-0.373333	0.898967	-0.278676
57	-0.373333	0.902777	-0.28308
57	-0.373333	0.906586	-0.287482
57	-0.373333	0.910396	-0.291878
57	-0.373333	0.914205	-0.296267
57	-0.373333	0.918015	-0.300647
57	-0.373333	0.921824	-0.305015
57	-0.373333	0.925634	-0.30937
57	-0.373333	0.929443	-0.313709
57	-0.373333	0.933253	-0.318031
57	-0.373333	0.937062	-0.322334
57	-0.373333	0.940872	-0.326616
57	-0.373333	0.944682	-0.330875
57	-0.373333	0.948491	-0.33511
57	-0.373333	0.952301	-0.339318
57	-0.373333	0.95611	-0.343499
57	-0.373333	0.95992	-0.347651
57	-0.373333	0.963729	-0.351773
57	-0.373333	0.967539	-0.355864
57	-0.373333	0.971348	-0.359922
57	-0.373333	0.975158	-0.363948
57	-0.373333	0.978967	-0.36794
57	-0.373333	0.982777	-0.371896
57	-0.373333	0.986586	-0.375819
57	-0.373333	0.990396	-0.379704
57	-0.373333	0.994205	-0.383555
57	-0.373333	0.998015	-0.387369
57	-0.373333	1.00182	-0.391147
57	-0.373333	1.00563	-0.394888
57	-0.373333	1.00944	-0.398592
57	-0.373333	1.01325	-0.402258
57	-0.373333	1.01706	-0.405888
57	-0.373333	1.02087	-0.40948
57	-0.373333	1.02468	-0.413033
57	-0.373333	1.02849	-0.416548
57	-0.373333	1.0323	-0.420025
57	-0.373333	1.03611	-0.423461
57	-0.373333	1.03992	-0.426857
57	-0.373333	1.04373	-0.430212
57	-0.373333	1.04754	-0.433523
57	-0.373333	1.05135	-0.436789
57	-0.373333	1.05516	-0.440009
57	-0.373333	1.05897	-0.443179
57	-0.373333	1.06278	-0.446297
57	-0.373333	1.06659	-0.449359
57	-0.373333	1.0704	-0.452361
57	-0.373333	1.07421	-0.455297
57	-0.373333	1.07801	-0.458162
57	-0.373333	1.08182	-0.460952
57	-0.373333	1.08563	-0.463655
57	-0.373333	1.08944	-0.466264
57	-0.373333	1.09325	-0.468768
57	-0.373333	1.09706	-0.471155
57	-0.373333	1.10087	-0.473413
57	-0.373333	1.10468	-0.475524
57	-0.373333	1.10849	-0.477474
57	-0.373333	1.1123	-0.479242
57	-0.373333	1.11611	-0.48081
57	-0.373333	1.11992	-0.482157
57	-0.373333	1.12373	-0.483264
57	-0.373333	1.12754	-0.484111
57	-0.373333	1.13135	-0.484686
57	-0.373333	1.13516	-0.484973
57	-0.373333	1.13897	-0.48497
57	-0.373333	1.14278	-0.484675
57	-0.373333	1.14659	-0.484096
57	-0.373333	1.1504	-0.483242
57	-0.373333	1.15421	-0.482131
57	-0.373333	1.15801	-0.480779
57	-0.369524	0.358015	0.0291485
57	-0.369524	0.361824	0.0322282
57	-0.369524	0.365634	0.0352067
57	-0.369524	0.369443	0.0380819
57	-0.369524	0.373253	0.0408509
57	-0.369524	0.377062	0.0435104
57	-0.369524	0.380872	0.0460583
57	-0.369524	0.384682	0.0484919
57	-0.369524	0.388491	0.0508079
57	-0.369524	0.392301	0.0530045
57	-0.369524	0.39611	0.0550783
57	-0.369524	0.39992	0.0570276
57	-0.369524	0.403729	0.0588493
57	-0.369524	0.407539	0.0605417
57	-0.369524	0.411348	0.0621032
57	-0.369524	0.415158	0.0635311
57	-0.369524	0.418967	0.0648247
57	-0.369524	0.422777	0.0659817
57	-0.369524	0.426586	0.0670019
57	-0.369524	0.430396	0.0678849
57	-0.369524	0.434205	0.0686308
57	-0.369524	0.438015	0.0692404
57	-0.369524	0.441824	0.0697151
57	-0.369524	0.445634	0.0700581
57	-0.369524	0.449443	0.0702727
57	-0.369524	0.453253	0.0703643
57	-0.369524	0.457062	0.0703376
57	-0.369524	0.460872	0.070201
57	-0.369524	0.464682	0.0699626
57	-0.369524	0.468491	0.0696321
57	-0.369524	0.472301	0.0692208
57	-0.369524	0.47611	0.0687412
57	-0.369524	0.47992	0.0682051
57	-0.369524	0.483729	0.0676271
57	-0.369524	0.487539	0.067021
57	-0.369524	0.491348	0.0664003
57	-0.369524	0.495158	0.0657793
57	-0.369524	0.498967	0.0651724
57	-0.369524	0.502777	0.0645912
57	-0.369524	0.506586	0.0640487
57	-0.369524	0.510396	0.0635552
57	-0.369524	0.514205	0.0631191
57	-0.369524	0.518015	0.0627459
57	-0.369524	0.521824	0.0624356
57	-0.369524	0.525634	0.0621777
57	-0.369524	0.529443	0.0619427
57	-0.369524	0.533253	0.0616611
57	-0.369524	0.537062	0.0611872
57	-0.369524	0.540872	0.060291
57	-0.369524	0.544682	0.0587989
57	-0.369524	0.548491	0.0567768
57	-0.369524	0.552301	0.0544082
57	-0.369524	0.55611	0.0518332
57	-0.369524	0.55992	0.0491291
57	-0.369524	0.563729	0.0463372
57	-0.369524	0.567539	0.043482
57	-0.369524	0.571348	0.0405781
57	-0.369524	0.575158	0.0376351
57	-0.369524	0.578967	0.0346596
57	-0.369524	0.582777	0.0316571
57	-0.369524	0.586586	0.028632
57	-0.369524	0.590396	0.0255868
57	-0.369524	0.594205	0.0225248
57	-0.369524	0.598015	0.0194482
57	-0.369524	0.601824	0.016359
57	-0.369524	0.605634	0.0132585
57	-0.369524	0.609443	0.0101486
57	-0.369524	0.613253	0.00702996
57	-0.369524	0.617062	0.00390336
57	-0.369524	0.620872	0.00076991
57	-0.369524	0.624682	-0.00237051
57	-0.369524	0.628491	-0.00551751
57	-0.369524	0.632301	-0.00867037
57	-0.369524	0.63611	-0.0118302
57	-0.369524	0.63992	-0.0149961
57	-0.369524	0.643729	-0.0181691
57	-0.369524	0.647539	-0.0213488
57	-0.369524	0.651348	-0.0245363
57	-0.369524	0.655158	-0.0277317
57	-0.369524	0.658967	-0.0309365
57	-0.369524	0.662777	-0.0341503
57	-0.369524	0.666586	-0.037374
57	-0.369524	0.670396	-0.0406082
57	-0.369524	0.674205	-0.0438539
57	-0.369524	0.678015	-0.0471121
57	-0.369524	0.681824	-0.0503825
57	-0.369524	0.685634	-0.0536666
57	-0.369524	0.689443	-0.0569646
57	-0.369524	0.693253	-0.0602777
57	-0.369524	0.697062	-0.0636065
57	-0.369524	0.700872	-0.0669515
57	-0.369524	0.704682	-0.0703129
57	-0.369524	0.708491	-0.0736918
57	-0.369524	0.712301	-0.0770889
57	-0.369524	0.71611	-0.0805047
57	-0.369524	0.71992	-0.0839391
57	-0.369524	0.723729	-0.0873934
57	-0.369524	0.727539	-0.0908681
57	-0.369524	0.731348	-0.0943632
57	-0.369524	0.735158	-0.0978797
57	-0.369524	0.738967	-0.101418
57	-0.369524	0.742777	-0.104978
57	-0.369524	0.746586	-0.10856
57	-0.369524	0.750396	-0.112166
57	-0.369524	0.754205	-0.115794
57	-0.369524	0.758015	-0.119447
57	-0.369524	0.761824	-0.123123
57	-0.369524	0.765634	-0.126824
57	-0.369524	0.769443	-0.13055
57	-0.369524	0.773253	-0.134301
57	-0.369524	0.777062	-0.138077
57	-0.369524	0.780872	-0.141879
57	-0.369524	0.784682	-0.145707
57	-0.369524	0.788491	-0.149561
57	-0.369524	0.792301	-0.153441
57	-0.369524	0.79611	-0.157347
57	-0.369524	0.79992	-0.161281
57	-0.369524	0.803729	-0.16524
57	-0.369524	0.807539	-0.169226
57	-0.369524	0.811348	-0.17324
57	-0.369524	0.815158	-0.177278
57	-0.369524	0.818967	-0.181344
57	-0.369524	0.822777	-0.185435
57	-0.369524	0.826586	-0.189552
57	-0.369524	0.830396	-0.193694
57	-0.369524	0.834205	-0.197861
57	-0.369524	0.838015	-0.202052
57	-0.369524	0.841824	-0.206266
57	-0.369524	0.845634	-0.210502
57	-0.369524	0.849443	-0.21476
57	-0.369524	0.853253	-0.219039
57	-0.369524	0.857062	-0.223337
57	-0.369524	0.860872	-0.227654
57	-0.369524	0.864682	-0.231987
57	-0.369524	0.868491	-0.236336
57	-0.369524	0.872301	-0.2407
57	-0.369524	0.87611	-0.245076
57	-0.369524	0.87992	-0.249462
57	-0.369524	0.883729	-0.253859
57	-0.369524	0.887539	-0.258261
57	-0.369524	0.891348	-0.26267
57	-0.369524	0.895158	-0.267081
57	-0.369524	0.898967	-0.271495
57	-0.369524	0.902777	-0.275907
57	-0.369524	0.906586	-0.280317
57	-0.369524	0.910396	-0.284722
57	-0.369524	0.914205	-0.28912
57	-0.369524	0.918015	-0.293509
57	-0.369524	0.921824	-0.297887
57	-0.369524	0.925634	-0.302251
57	-0.369524	0.929443	-0.3066
57	-0.369524	0.933253	-0.310931
57	-0.369524	0.937062	-0.315244
57	-0.369524	0.940872	-0.319536
57	-0.369524	0.944682	-0.323805
57	-0.369524	0.948491	-0.32805
57	-0.369524	0.952301	-0.332268
57	-0.369524	0.95611	-0.336459
57	-0.369524	0.95992	-0.340622
57	-0.369524	0.963729	-0.344754
57	-0.369524	0.967539	-0.348856
57	-0.369524	0.971348	-0.352925
57	-0.369524	0.975158	-0.356962
57	-0.369524	0.978967	-0.360965
57	-0.369524	0.982777	-0.364933
57	-0.369524	0.986586	-0.368867
57	-0.369524	0.990396	-0.372765
57	-0.369524	0.994205	-0.376628
57	-0.369524	0.998015	-0.380455
57	-0.369524	1.00182	-0.384245
57	-0.369524	1.00563	-0.388
57	-0.369524	1.00944	-0.391717
57	-0.369524	1.01325	-0.395398
57	-0.369524	1.01706	-0.399041
57	-0.369524	1.02087	-0.402647
57	-0.369524	1.02468	-0.406216
57	-0.369524	1.02849	-0.409746
57	-0.369524	1.0323	-0.413238
57	-0.369524	1.03611	-0.416691
57	-0.369524	1.03992	-0.420103
57	-0.369524	1.04373	-0.423473
57	-0.369524	1.04754	-0.426801
57	-0.369524	1.05135	-0.430084
57	-0.369524	1.05516	-0.43332
57	-0.369524	1.05897	-0.436507
57	-0.369524	1.06278	-0.439641
57	-0.369524	1.06659	-0.44272
57	-0.369524	1.0704	-0.445738
57	-0.369524	1.07421	-0.44869
57	-0.369524	1.07801	-0.451571
57	-0.369524	1.08182	-0.454373
57	-0.369524	1.08563	-0.457089
57	-0.369524	1.08944	-0.459711
57	-0.369524	1.09325	-0.462227
57	-0.369524	1.09706	-0.464623
57	-0.369524	1.10087	-0.466889
57	-0.369524	1.10468	-0.469008
57	-0.369524	1.10849	-0.470962
57	-0.369524	1.1123	-0.472734
57	-0.369524	1.11611	-0.474305
57	-0.369524	1.11992	-0.475654
57	-0.369524	1.12373	-0.47676
57	-0.369524	1.12754	-0.477608
57	-0.369524	1.13135	-0.478182
57	-0.369524	1.13516	-0.47847
57	-0.369524	1.13897	-0.478466
57	-0.369524	1.14278	-0.478172
57	-0.369524	1.14659	-0.477593
57	-0.369524	1.1504	-0.476739
57	-0.369524	1.15421	-0.475628
57	-0.369524	1.15801	-0.474274
57	-0.365714	0.358015	0.0206736
57	-0.365714	0.361824	0.0237932
57	-0.365714	0.365634	0.0268179
57	-0.365714	0.369443	0.0297447
57	-0.365714	0.373253	0.0325714
57	-0.365714	0.377062	0.0352958
57	-0.365714	0.380872	0.0379153
57	-0.365714	0.384682	0.0404283
57	-0.365714	0.388491	0.0428325
57	-0.365714	0.392301	0.045125
57	-0.365714	0.39611	0.0473048
57	-0.365714	0.39992	0.0493696
57	-0.365714	0.403729	0.0513178
57	-0.365714	0.407539	0.053148
57	-0.365714	0.411348	0.0548583
57	-0.365714	0.415158	0.0564482
57	-0.365714	0.418967	0.057916
57	-0.365714	0.422777	0.0592611
57	-0.365714	0.426586	0.0604835
57	-0.365714	0.430396	0.0615828
57	-0.365714	0.434205	0.0625591
57	-0.365714	0.438015	0.0634132
57	-0.365714	0.441824	0.0641467
57	-0.365714	0.445634	0.0647616
57	-0.365714	0.449443	0.0652598
57	-0.365714	0.453253	0.0656449
57	-0.365714	0.457062	0.0659206
57	-0.365714	0.460872	0.0660918
57	-0.365714	0.464682	0.0661642
57	-0.365714	0.468491	0.0661444
57	-0.365714	0.472301	0.0660394
57	-0.365714	0.47611	0.0658579
57	-0.365714	0.47992	0.065609
57	-0.365714	0.483729	0.0653019
57	-0.365714	0.487539	0.0649475
57	-0.365714	0.491348	0.0645561
57	-0.365714	0.495158	0.0641384
57	-0.365714	0.498967	0.0637049
57	-0.365714	0.502777	0.0632661
57	-0.365714	0.506586	0.0628301
57	-0.365714	0.510396	0.0624041
57	-0.365714	0.514205	0.061991
57	-0.365714	0.518015	0.0615884
57	-0.365714	0.521824	0.0611835
57	-0.365714	0.525634	0.060747
57	-0.365714	0.529443	0.0602225
57	-0.365714	0.533253	0.0595181
57	-0.365714	0.537062	0.0585169
57	-0.365714	0.540872	0.0571324
57	-0.365714	0.544682	0.0553698
57	-0.365714	0.548491	0.0533056
57	-0.365714	0.552301	0.0510291
57	-0.365714	0.55611	0.0486078
57	-0.365714	0.55992	0.0460867
57	-0.365714	0.563729	0.043494
57	-0.365714	0.567539	0.0408483
57	-0.365714	0.571348	0.0381607
57	-0.365714	0.575158	0.0354412
57	-0.365714	0.578967	0.0326949
57	-0.365714	0.582777	0.0299271
57	-0.365714	0.586586	0.0271408
57	-0.365714	0.590396	0.0243382
57	-0.365714	0.594205	0.0215219
57	-0.365714	0.598015	0.0186932
57	-0.365714	0.601824	0.0158542
57	-0.365714	0.605634	0.0130049
57	-0.365714	0.609443	0.0101462
57	-0.365714	0.613253	0.00727856
57	-0.365714	0.617062	0.00440237
57	-0.365714	0.620872	0.00151801
57	-0.365714	0.624682	-0.00137541
57	-0.365714	0.628491	-0.00427795
57	-0.365714	0.632301	-0.00718893
57	-0.365714	0.63611	-0.0101099
57	-0.365714	0.63992	-0.0130414
57	-0.365714	0.643729	-0.0159836
57	-0.365714	0.647539	-0.0189372
57	-0.365714	0.651348	-0.021903
57	-0.365714	0.655158	-0.0248819
57	-0.365714	0.658967	-0.027875
57	-0.365714	0.662777	-0.0308821
57	-0.365714	0.666586	-0.0339055
57	-0.365714	0.670396	-0.0369443
57	-0.365714	0.674205	-0.0400004
57	-0.365714	0.678015	-0.0430741
57	-0.365714	0.681824	-0.0461669
57	-0.365714	0.685634	-0.0492791
57	-0.365714	0.689443	-0.0524108
57	-0.365714	0.693253	-0.0555636
57	-0.365714	0.697062	-0.0587371
57	-0.365714	0.700872	-0.0619336
57	-0.365714	0.704682	-0.0651518
57	-0.365714	0.708491	-0.0683936
57	-0.365714	0.712301	-0.0716591
57	-0.365714	0.71611	-0.0749484
57	-0.365714	0.71992	-0.078263
57	-0.365714	0.723729	-0.0816025
57	-0.365714	0.727539	-0.0849672
57	-0.365714	0.731348	-0.0883577
[truncated: 87,044 more rows]
