# Supplementary material for: Spin Berry curvature-enhanced orbital Zeeman effect in a kagome metal
Source: Springer Nature journal article supplement (doi:10.1038/s41567-024-02487-z), 2024-04-22
Supplement: MOESM3 [file 41567_2024_2487_MOESM3_ESM.xlsx]

## Sheet: magnetization
Magnetic Field	M
T	muB/Tb
3.717e-06	0.01138
0.101413	2.57289		B parallel to c
0.304376	7.28831
0.507271	8.5725
0.710179	8.5883
0.913086	8.59478
1.11599	8.5984
1.31888	8.6008
1.52179	8.60191
1.72468	8.60238
1.92758	8.60399
2.13048	8.60586
2.33337	8.60496
2.53626	8.6087
2.73914	8.61128
2.94207	8.61334
3.14497	8.61483
3.34785	8.61563
3.55075	8.61716
3.75365	8.61882
3.95654	8.61857
4.15946	8.61941
4.36235	8.61971
4.56526	8.62031
4.76816	8.62059
4.97106	8.62092
5.17396	8.61952
5.37686	8.62047
5.57973	8.61988
5.78265	8.62228
5.98553	8.62164
6.18843	8.62188
6.39133	8.62106
6.59419	8.6216
6.79714	8.62288
7.00002	8.6239

## Sheet: 2K
B	E*
T	meV
0	190.577
0.2	190.523
0.5	175.697
1	169.756
2	161.661
4	161.805
6	161.191

## Sheet: 4.2K
B	E*
T	meV
0	191.009
0.2	190.97
0.4	186.483
0.6	184.287
0.7	179.029
0.8	177.507
1	175.866
1.2	172.884
1.4	170.851
1.6	167.698
1.8	166.794
2	165.571
2.2	164.215
2.4	164.29
2.6	162.6
2.8	162.444
3	162.672
3.5	161.772
4	162.008
4.5	161.053
5	160.836
5.5	160.622
6	161.138

## Sheet: 10K
B	E*
T	meV
0	203.768
2	185.102
4	177.653
6	174.891
