# Supplementary material for: Spin Berry curvature-enhanced orbital Zeeman effect in a kagome metal
Source: Springer Nature journal article supplement (doi:10.1038/s41567-024-02487-z), 2024-04-22
Supplement: MOESM4 [file 41567_2024_2487_MOESM4_ESM.xlsx]

## Sheet: (a)
Energy	dI/dV
meV	a.u.
300	9.90654
298	9.91276
296	9.94764
294	9.95827
292	9.98044
290	10.015
288	9.9912
286	10.0125
284	10.0426
282	10.0435
280	10.0626
278	10.0603
276	10.0743
274	10.0525
272	10.0426
270	10.0399
268	10.0332
266	10.0308
264	10.002
262	9.96391
260	9.92973
258	9.87882
256	9.83866
254	9.80056
252	9.73627
250	9.66057
248	9.60416
246	9.55642
244	9.51229
242	9.4484
240	9.40659
238	9.37471
236	9.35299
234	9.34357
232	9.35202
230	9.35417
228	9.38519
226	9.41834
224	9.45179
222	9.48991
220	9.52166
218	9.56473
216	9.61832
214	9.64265
212	9.66618
210	9.68335
208	9.71227
206	9.73529
204	9.74226
202	9.73467
200	9.70713
198	9.68197
196	9.64356
194	9.59804
192	9.54326
190	9.44801
188	9.32844
186	9.16673
184	8.91536
182	8.56664
180	8.10564
178	7.50797
176	6.78214
174	5.98876
172	5.20074
170	4.48971
168	3.8887
166	3.39263
164	2.98762
162	2.66508
160	2.41142
158	2.20921
156	2.04754
154	1.90522
152	1.78944
150	1.69424
148	1.61388
146	1.54461
144	1.48151
142	1.42546
140	1.38503
138	1.351
136	1.32405
134	1.30158
132	1.28615
130	1.28231
128	1.2858
126	1.29158
124	1.30446
122	1.32368
120	1.34783
118	1.36809
116	1.39928
114	1.44147
112	1.469
110	1.50506
108	1.53171
106	1.56016
104	1.57952
102	1.59444
100	1.60163

## Sheet: (b)
Energy	dI/dV
meV	a.u.
300	9.25695
298	9.23859
296	9.27741
294	9.28667
292	9.29023
290	9.32622
288	9.30291
286	9.30677
284	9.32797
282	9.34205
280	9.33212
278	9.32622
276	9.35312
274	9.31314
272	9.31574
270	9.32963
268	9.3177
266	9.32079
264	9.31621
262	9.30712
260	9.28384
258	9.28219
256	9.27433
254	9.26276
252	9.26078
250	9.23141
248	9.21099
246	9.21638
244	9.2015
242	9.16308
240	9.13757
238	9.12825
236	9.10119
234	9.07155
232	9.04987
230	9.0062
228	8.98455
226	8.97352
224	8.95315
222	8.91461
220	8.88163
218	8.85762
216	8.83184
214	8.79565
212	8.75667
210	8.70239
208	8.65423
206	8.59786
204	8.52979
202	8.44731
200	8.33641
198	8.22569
196	8.07298
194	7.89897
192	7.70454
190	7.49647
188	7.2983
186	7.09281
184	6.89656
182	6.72867
180	6.58353
178	6.45192
176	6.33558
174	6.23015
172	6.1365
170	6.05166
168	5.98244
166	5.90911
164	5.83173
162	5.74711
160	5.66483
158	5.56761
156	5.45511
154	5.30272
152	5.11738
150	4.89411
148	4.62978
146	4.32289
144	3.98795
142	3.64961
140	3.331
138	3.03636
136	2.77847
134	2.55547
132	2.36422
130	2.21319
128	2.09199
126	1.99417
124	1.92064
122	1.85872
120	1.82036
118	1.78457
116	1.7664
114	1.76231
112	1.75086
110	1.74962
108	1.74804
106	1.74516
104	1.73824
102	1.73275
100	1.72096

## Sheet: (c)
B(T)	0	1	2	4	6
Energy	QPI linecut	QPI linecut	QPI linecut	QPI linecut	QPI linecut
meV	a.u.	a.u.	a.u.	a.u.	a.u.
300	1.51309	1.34688	1.45934	1.20501	1.3173
298	1.51309	1.34688	1.45934	1.20501	1.29211
296	1.51309	1.36516	1.50167	1.21092	1.27811
294	1.53147	1.3615	1.47345	1.21092	1.26132
292	1.54374	1.35419	1.47345	1.21387	1.26132
290	1.58665	1.34322	1.47345	1.19911	1.26692
288	1.58665	1.35054	1.50167	1.1873	1.26692
286	1.58052	1.35785	1.4805	1.17549	1.24453
284	1.56826	1.37978	1.45229	1.16073	1.24173
282	1.54374	1.36516	1.43818	1.15778	1.20814
280	1.51922	1.33591	1.43466	1.15778	1.20814
278	1.51922	1.32495	1.4276	1.16073	1.18855
276	1.51922	1.31764	1.42407	1.16959	1.18015
274	1.50083	1.31033	1.4135	1.16369	1.17735
272	1.46405	1.32495	1.41702	1.14007	1.18015
270	1.44566	1.32495	1.42408	1.13122	1.18015
268	1.43339	1.33957	1.44171	1.12826	1.16616
266	1.42113	1.34688	1.39939	1.12826	1.16616
264	1.37822	1.36881	1.37823	1.13417	1.15776
262	1.33531	1.34323	1.37823	1.14302	1.16056
260	1.31079	1.33957	1.38176	1.14302	1.16056
258	1.29853	1.34688	1.39234	1.14598	1.17175
256	1.28627	1.35419	1.36059	1.14893	1.17735
254	1.24949	1.37612	1.36412	1.15778	1.19415
252	1.24949	1.3944	1.36412	1.16664	1.19415
250	1.23109	1.39074	1.39939	1.19026	1.20814
248	1.26174	1.39074	1.39939	1.19911	1.21094
246	1.24335	1.41999	1.37118	1.21387	1.21933
244	1.23722	1.44558	1.37118	1.22568	1.22773
242	1.24336	1.48213	1.37118	1.24634	1.23333
240	1.24336	1.49676	1.37471	1.25815	1.25292
238	1.24949	1.50041	1.34296	1.27291	1.26972
236	1.28627	1.54062	1.33943	1.28767	1.27811
234	1.32305	1.55159	1.30769	1.30538	1.28371
232	1.39048	1.58083	1.31122	1.32014	1.29211
230	1.46405	1.59911	1.31122	1.329	1.3089
228	1.52535	1.65394	1.36412	1.33195	1.3145
226	1.60504	1.71974	1.36765	1.35556	1.3229
224	1.66022	1.7965	1.4135	1.39098	1.32849
222	1.76443	1.8623	1.46992	1.4264	1.35648
220	1.86865	1.90982	1.50872	1.44117	1.37608
218	1.95447	1.97196	1.62863	1.45888	1.39007
216	2.07708	2.04141	1.72032	1.4943	1.39287
214	2.1629	2.11818	1.7838	1.55924	1.41526
212	2.27325	2.18764	1.81907	1.60943	1.46844
210	2.35294	2.22419	1.85434	1.66256	1.52162
208	2.46329	2.24978	1.91782	1.70684	1.5804
206	2.59815	2.2644	1.97778	1.77473	1.63918
204	2.72689	2.31192	2.04126	1.82491	1.68956
202	2.86789	2.3631	2.02715	1.84558	1.71755
200	3.04567	2.35944	1.96014	1.81311	1.69236
198	3.24797	2.32654	1.86139	1.74226	1.61958
196	3.4564	2.28268	1.69917	1.6419	1.53002
194	3.68935	2.22419	1.59689	1.5622	1.45445
192	3.90391	2.17301	1.48755	1.50611	1.41246
190	4.17978	2.13646	1.44171	1.46183	1.37328
188	4.48629	2.1328	1.38881	1.40279	1.3229
186	4.87863	2.1328	1.34296	1.32309	1.25292
184	5.24032	2.14011	1.31827	1.25225	1.15776
182	5.48553	2.18398	1.30417	1.19025	1.07379
180	5.63879	2.29729	1.30769	1.13417	0.998218
178	5.77979	2.45448	1.32885	1.06037	0.939441
176	5.89013	2.71402	1.3747	1.00724	0.891858
174	5.84109	2.99914	1.52283	0.971814	0.852672
172	5.4978	3.28061	1.7168	0.971814	0.821884
170	5.05028	3.5109	2.00951	0.974766	0.821884
168	4.60889	3.67905	2.35514	1.00429	0.838678
166	4.25334	3.78871	2.71487	1.07218	0.891858
164	3.99587	3.73388	3.13808	1.21387	1.00662
162	3.85487	3.67174	3.33204	1.38803	1.18295
160	3.76905	3.61691	3.40611	1.62418	1.40966
158	3.72613	3.58036	3.45196	1.87805	1.65877
156	3.70161	3.55477	3.46959	2.11125	1.88828
154	3.70161	3.53283	3.48017	2.29427	2.10661
152	3.72613	3.49263	3.56129	2.40053	2.26615
150	3.75066	3.44876	3.70941	2.48614	2.3753
148	3.79357	3.40124	3.87164	2.61308	2.43128
146	3.81809	3.32813	3.94218	2.79905	2.53485
144	3.76291	3.23674	3.79758	3.0411	2.73077
142	3.68935	3.11612	3.61771	3.26544	2.96029
140	3.58513	2.98817	3.42727	3.4278	3.1842
138	3.43188	2.85292	3.22978	3.36876	3.29056
136	3.27249	2.70305	3.04991	3.19755	3.1814
134	3.07632	2.54952	2.86299	2.97911	2.95749
132	2.88628	2.37772	2.69723	2.76657	2.72517
130	2.65333	2.21687	2.56322	2.56584	2.52365
128	2.43877	2.0597	2.41862	2.38873	2.35291
126	2.21195	1.91713	2.29871	2.24113	2.19337
124	1.99738	1.76726	2.17528	2.12601	2.05063
122	1.80734	1.63566	2.04126	2.00203	1.91907
120	1.62343	1.48213	1.93898	1.90461	1.82111
118	1.45178	1.3615	1.80849	1.80425	1.71475
116	1.30466	1.22625	1.70269	1.71569	1.63638
114	1.15753	1.1239	1.56515	1.63009	1.54682
112	1.02879	1.01058	1.45934	1.54743	1.48244
110	0.912315	0.926504	1.35707	1.47659	1.41806
108	0.826491	0.84974	1.25832	1.39394	1.36208
106	0.759057	0.787597	1.17015	1.32014	1.29491
104	0.703885	0.732766	1.08551	1.23749	1.22493
102	0.667103	0.6889	1.03613	1.17254	1.16616
100	0.667103	0.6889	1.03613	1.17254	1.16616

## Sheet: (d)
B(T)	0	1	2	4	6
Energy	-dI^3/dV^3	-dI^3/dV^4	-dI^3/dV^5	-dI^3/dV^6	-dI^3/dV^7
meV	a.u.	a.u.	a.u.	a.u.	a.u.
100	0.00145629	0.000969199	0.00089067	0.000120848	0.000130777
102	0.00165453	0.0010516	0.000898454	0.000154764	0.000167217
104	0.00185271	0.001134	0.000925465	0.000115723	8.72095e-05
106	0.00195429	0.00121638	0.000960259	7.66796e-05	3.64225e-05
108	0.00225199	0.00129874	0.000921805	3.7633e-05	5.14058e-05
110	0.00254952	0.00140801	0.000849308	-1.41659e-06	-0.000152889
112	0.00181307	0.00151725	0.000720966	-0.0010259	-0.00178979
114	0.000838189	0.000654157	0.000592592	-0.00205243	-0.0034319
116	-0.000138455	-0.000210378	-0.00103897	-0.00440867	-0.00581321
118	-0.00115597	-0.00107636	-0.00267564	-0.00677568	-0.00813559
120	-0.00216427	-0.0019438	-0.00431745	-0.00915352	-0.0102332
122	-0.00283988	-0.00282861	-0.00596441	-0.0115423	-0.0116728
124	-0.00354912	-0.00365284	-0.00785558	-0.0129758	-0.0131164
126	-0.00423729	-0.00447838	-0.00931234	-0.0144132	-0.014564
128	-0.00492633	-0.00509519	-0.0107731	-0.0155545	-0.015873
130	-0.00558774	-0.00571272	-0.0131605	-0.0161999	-0.0156034
132	-0.0060868	-0.00644536	-0.0155476	-0.0160723	-0.0151917
134	-0.00642978	-0.00704574	-0.0172784	-0.0159447	-0.0138752
136	-0.00700869	-0.00753219	-0.0182826	-0.0145504	-0.012562
138	-0.00758821	-0.00864946	-0.0192765	-0.0131166	-0.0102137
140	-0.00793739	-0.00990953	-0.0196757	-0.0109348	-0.00787591
142	-0.00845418	-0.0111023	-0.019947	-0.00876205	-0.00465935
144	-0.00888769	-0.0122977	-0.0186282	-0.00565945	-0.00146259
146	-0.00932153	-0.0145071	-0.0171206	-0.00250778	0.00203895
148	-0.0106596	-0.0167259	-0.0143671	0.00098272	0.00622282
150	-0.0144194	-0.018954	-0.011564	0.00498766	0.0103727
152	-0.0182049	-0.0207222	-0.00758526	0.00896144	0.0135769
154	-0.0220166	-0.0210948	-0.00363631	0.0123869	0.0167608
156	-0.0258161	-0.0209981	0.00104755	0.0157893	0.0179422
158	-0.0270453	-0.019592	0.00607199	0.0171216	0.0191209
160	-0.0282386	-0.0181897	0.0114129	0.0184503	0.0207644
162	-0.0289798	-0.0152043	0.0171905	0.0194929	0.0179397
164	-0.0287775	-0.0122358	0.0229031	0.0167242	0.013624
166	-0.0254442	-0.00795786	0.0257005	0.0131193	0.00972965
168	-0.0211988	-0.0032824	0.0284824	0.00948848	0.0065777
170	-0.016008	0.00135128	0.0279824	0.00649191	0.00387
172	-0.0104132	0.00697823	0.0249921	0.00347761	0.00126491
174	-0.00150442	0.0125439	0.0206869	0.00145926	-0.00135343
176	0.00769747	0.0162375	0.0170188	-0.000567053	-0.00251584
178	0.0172448	0.0199042	0.0136252	-0.00120968	-0.00368086
180	0.0266223	0.021396	0.0102089	-0.0018531	-0.00405831
182	0.0363271	0.0214435	0.00676967	-0.00142793	-0.00405478
184	0.0458516	0.0207576	0.00518924	-0.0010031	-0.00321534
186	0.0512802	0.0192072	0.00360397	-0.000226881	-0.00199752
188	0.0532851	0.0179674	0.00345915	0.00105925	1.45545e-06
190	0.0533737	0.0168033	0.00331429	0.0030259	0.00199271
192	0.0494717	0.0157732	0.00503586	0.00514699	0.0040553
194	0.0448309	0.014741	0.00675172	0.0072593	0.00610961
196	0.0387324	0.0138005	0.00840407	0.00881248	0.00783699
198	0.0332768	0.0133111	0.0100511	0.0103609	0.00955852
200	0.0277627	0.0130996	0.0116929	0.0116079	0.0111784
202	0.0228537	0.0132404	0.0133295	0.0128517	0.0116914
204	0.0178983	0.0133812	0.013413	0.0130183	0.0122038
206	0.0139689	0.0129323	0.0134965	0.0124066	0.0124908
208	0.0106249	0.0122585	0.0134957	0.0112958	0.0112111
210	0.00838997	0.0115837	0.0125319	0.0101826	0.00992827
212	0.00701219	0.0109081	0.0109436	0.0090199	0.00864215
214	0.00563085	0.0102316	0.00935042	0.00785458	0.00758634
216	0.00437779	0.0087449	0.00745827	0.00663846	0.00653471
218	0.0032553	0.00725384	0.00573582	0.00548297	0.00548091
220	0.00213045	0.00583058	0.00400761	0.00437534	0.00442494
222	0.00122575	0.00456745	0.00242027	0.00359517	0.00369043
224	0.000408045	0.00356643	0.000828063	0.00286445	0.00295486
226	-0.000410904	0.00256345	-7.08146e-05	0.00213268	0.00237914
228	-0.00180575	0.00160006	-0.000971245	0.00144089	0.00180277
230	-0.00320419	0.000882358	-0.00136761	0.00116832	0.00148973
232	-0.00434598	0.000344762	-0.00173948	0.000936666	0.00131252
234	-0.00477185	-9.82504e-05	-0.00165841	0.000836766	0.00117509
236	-0.00519805	-0.000401993	-0.00155258	0.000736848	0.00116988
238	-0.00549402	-0.000417927	-0.00143566	0.000840708	0.00116656
240	-0.00521405	-0.000433861	-0.00100752	0.000944546	0.00121156
242	-0.00493423	-0.000210354	-0.000579725	0.00113089	0.00136013
244	-0.00350462	1.3056e-05	0.000197657	0.00131717	0.00149119
246	-0.00207877	0.000236369	0.000973881	0.00150338	0.00156059
248	-0.00119993	0.000665172	0.00120128	0.00168953	0.00160843
250	-0.000322518	0.00119566	0.00142858	0.00160908	0.00165626
252	0.000661131	0.00176818	0.00165577	0.00153176	0.00159402
254	0.00185683	0.00234006	0.00188287	0.00145444	0.00154059
256	0.00304988	0.0024073	0.00190254	0.0013771	0.00153033
258	0.00355635	0.00233267	0.00192221	0.00129975	0.0015027
260	0.00406234	0.00227352	0.00199757	0.00123321	0.00147507
262	0.00443269	0.00222333	0.00209816	0.00124095	0.00144744
264	0.00465281	0.00216691	0.00219874	0.00124869	0.00141981
266	0.00474731	0.00211048	0.00224277	0.00112399	0.00137536
268	0.00484179	0.002064	0.00238333	0.0011432	0.00138823
270	0.00465822	0.00203622	0.00252385	0.00124886	0.0014011
272	0.00451441	0.00203313	0.00251831	0.00127531	0.00152425
274	0.00437057	0.00203005	0.00268166	0.00130176	0.00164738
276	0.00398285	0.00202697	0.00284875	0.00141759	0.00177047
278	0.00387365	0.00199193	0.00286596	0.00157683	0.00189353
280	0.00389893	0.00202562	0.00288317	0.00180217	0.00203899
282	0.00344081	0.00205931	0.00290038	0.00197959	0.0021844
284	0.00298229	0.00218429	0.00291759	0.00215695	0.0023798
286	0.00252338	0.00237146	0.00279187	0.00233425	0.00268257
288	0.00216532	0.00255855	0.00266612	0.00251149	0.00298516
290	0.00188006	0.00237882	0.00242785	0.00213758	0.00263701
292	0.00159466	0.00271818	0.00212958	0.00176339	0.00228862
294	0.0013091	0.00305731	0.00186111	0.00138894	0.00193999
296	0.00114434	0.00264618	0.0015925	0.00121711	0.00159113
298	0.000984139	0.00223471	0.00153953	0.00114949	0.00157783
300	0.00097952	0.00223471	0.00156602	0.00108185	0.00158448

## Sheet: (e)
Method	extracted from QPI linecut	extracted from QPI linecut	extracted from dI^3/dV^3	extracted from dI^3/dV^3
B	band bottom: E2(q=0)	band bottom: E1(q=0)	band bottom: E*	band bottom: E**
T	meV	meV	meV	meV
0	178.37	178.37	190.186	190.186
1	167.173	201.442	181.077	202.345
2	162.078	205.295	169.25	204.993
4	152.655	205.194	160.316	204.46
6	153.497	204.635	157.998	204.841

## Sheet: (h)
q	E1(q)-E0(q)
Å^(-1)	meV
-0.165347	-14
-0.154324	-14
-0.143301	-10
-0.132278	-8
-0.121254	-4
-0.110231	2
-0.0992082	6
-0.0881851	8
-0.0771619	12
-0.0661388	16
-0.0551157	14
-0.0440925	18
-0.0330694	18
0.0330694	18
0.0440925	18
0.0551157	14
0.0661388	16
0.0771619	12
0.0881851	8
0.0992082	6
0.110231	2
0.121254	-4
0.132278	-8
0.143301	-10
0.154324	-14
0.165347	-14

## Sheet: (i)
q	E2-E0
Å^(-1)	meV
-0.165347	-54
-0.154324	-50
-0.143301	-48
-0.132278	-48
-0.121254	-46
-0.110231	-42
-0.0992082	-40
-0.0881851	-38
-0.0771619	-36
-0.0661388	-36
-0.0551157	-36
-0.0440925	-30
0.0440925	-30
0.0551157	-36
0.0661388	-36
0.0771619	-36
0.0881851	-38
0.0992082	-40
0.110231	-42
0.121254	-46
0.132278	-48
0.143301	-48
0.154324	-50
0.165347	-54

## Sheet: (j)
Δ	m(k=0)
meV	meV/T
1.09536	31.0374
1.53957	22.07
1.98307	17.1248
2.42583	13.9913
2.86786	11.828
3.30914	10.2448
3.74967	9.0359
4.18944	8.08259
4.62844	7.31157
5.06666	6.67511
5.5041	6.14081
5.94074	5.6859
6.37658	5.2939
6.81161	4.95262
7.2458	4.65279
7.67917	4.38731
8.11169	4.15058
8.54335	3.93818
8.97415	3.74653
9.40406	3.57274
9.83309	3.41443
10.2612	3.2696
10.6884	3.13661
11.1147	3.01406
11.54	2.90077
11.9644	2.79573
12.3878	2.69807
12.8102	2.60703
13.2316	2.52196
13.6519	2.4423
14.0713	2.36754
14.4896	2.29725
14.9068	2.23103
15.3229	2.16854
15.7379	2.10948
16.1517	2.05357
16.5644	2.00056
16.9759	1.95023
17.3862	1.90239
17.7953	1.85685
18.2031	1.81346
18.6097	1.77205
19.0149	1.73251
19.4188	1.6947
19.8214	1.65852
20.2225	1.62386
20.6223	1.59063
21.0205	1.55874
21.4173	1.5281
21.8126	1.49866
22.2062	1.47034
22.5983	1.44307
22.9887	1.4168
23.3775	1.39148
23.7645	1.36705
24.1497	1.34347
24.5331	1.32069
24.9147	1.29867
25.2943	1.27739
25.672	1.25679
26.0476	1.23685
26.4211	1.21753
26.7925	1.19881
27.1617	1.18067
27.5287	1.16306
27.8933	1.14598
28.2555	1.12939
28.6152	1.11328
28.9724	1.09762
29.327	1.0824
29.6789	1.0676
30.028	1.0532
30.3743	1.03918
30.7177	1.02553
31.058	1.01224
31.3953	0.999287
31.7294	0.986664
32.0602	0.974357
32.3876	0.962354
32.7116	0.950644
33.032	0.939216
33.3488	0.92806
33.6619	0.917167
33.9712	0.906526
34.2765	0.896131
34.5778	0.885971
34.8751	0.876039
35.1681	0.866328
35.4569	0.85683
35.7413	0.847538
36.0213	0.838446
36.2968	0.829546
36.5678	0.820834
36.8341	0.812302
37.0956	0.803946
37.3525	0.79576
37.6045	0.787739
37.8517	0.779878
38.094	0.772171
38.3314	0.764616
38.5638	0.757206
